# Supplementary material for: (Hetero)arylboration of alkynes: a strategy for the synthesis of α,α-bis(hetero)arylketones
Source: Royal Society of Chemistry journal article supplement (doi:10.1039/c9ob00961b), 2019-01-01

## (Hetero)arylboration of Alkynes: A Strategy for the Synthesis of $\alpha,\alpha$ -Bis(hetero)arylketones

Yuan Huang, Allison M. Bergmann, and M. Kevin Brown

**General.**  $^1\text{H}$  NMR spectra were recorded at room temperature on a Varian I400 (400 MHz), a Varian VXR400 (400 MHz), a Varian I500 (500 MHz), or a Varian I600 (600 MHz) spectrometer. Chemical shifts are reported in ppm from tetramethylsilane with the solvent resonance as the internal standard ( $\text{CHCl}_3$ :  $\delta$ 7.26 ppm). Data are reported as follows: chemical shift, multiplicity (s = singlet, d = doublet, t = triplet, q = quartet, br = broad, m = multiplet), coupling constants (Hz), and integration.  $^{13}\text{C}$  NMR spectra were recorded on a Varian I400 (100 MHz), a Varian VXR400 (100 MHz), or a Varian I500 (125 MHz) spectrometer with complete proton decoupling. Chemical shifts are reported in ppm from tetramethylsilane with the solvent resonance as the internal standard ( $\text{CDCl}_3$ :  $\delta$ 77.16 ppm) or ( $\text{C}_6\text{D}_6$ :  $\delta$ 128.06 ppm). High-resolution mass spectrometry was performed on either a Waters/Micromass LCT Classic (ESI-TOF) or a Thermo Electron Corporation MAT 95XP-Trap (GC/MS). Melting points were obtained on a Thomas Hoover capillary melting point apparatus without correction.

Unless otherwise noted, all reactions have been carried out with distilled and degassed solvents under an atmosphere of dry  $\text{N}_2$  in oven-(135 °C) and flame-dried glassware with standard vacuum-line techniques. Diethyl ether and tetrahydrofuran was purified under a positive pressure of dry argon by passage through two columns of activated alumina. Toluene was purified under a positive pressure of dry argon by passage through columns of activated alumina and Q5 (Grubbs apparatus). All work-up and purification procedures were carried out with reagent grade solvents (purchased from Sigma-Aldrich) in air. Standard column chromatography techniques using ZEOprep 60/40-63  $\mu\text{m}$  silica gel and a Teledyne ISCO CombiFlash NextGen Chromatography System were used for purification.

### Reagents and Catalysts:

**Alkynes** were prepared in accordance with literature procedures.<sup>1</sup>

**Aphos** ((4-(*N,N*-Dimethylamino)phenyl)di-*tert*-butyl phosphine) was purchased from Sigma-Aldrich and used as received.

**Barium hydroxide** was purchased from Alfa Aesar and used as received.

**Bis(pinacolato)diboron** was purchased from Oakwood Chemicals and recrystallized from pentane prior to use.

**3-Bromofuran** was purchased from Combi-Blocks and used as received.

**5-Bromo-2-methoxypyridine** was purchased from Combi-Blocks and used as received.

**Copper chloride (99.995% metals basis)** was purchased from Strem and purified by wash with 1M HCl ( $3 \times 3\text{mL}$ ), ethanol ( $3 \times 3\text{mL}$ ), and diethyl ether ( $3 \times 3\text{mL}$ ) and dried *in vacuo* before use.

**1-Chloro-2,4-dinitrobenzene** was purchased from Alfa Aesar and used as received.

**Diphenylacetylene** was purchased from Sigma Aldrich and used as received.

**3,5-Dibromopyridine** was purchased from Chem Impex and used as received.

**Hex-3-yne** was purchased from Ark Pharm and used as received.

**Mesitylamine** was purchased from Sigma-Aldrich and used as received.

<sup>1</sup> K. L. Wilson, A. R. Kennedy, J. Murray, B. Greatrex, C. Jamieson and A. J. B. Watson, *Beilstein J. Org. Chem.*, 2016, **12**, 2005.

**Mesityl boronic acid** was purchased from Combi-Blocks and used as received.  
**Pd(OAc)<sub>2</sub>** was purchased from Strem and used as received.  
**Pd-G3-Aphos** was prepared in accordance with literature procedures.<sup>2</sup>  
**Pd(PPh<sub>3</sub>)<sub>4</sub>** was purchased from Strem and used as received.  
**Prop-1-yn-1-ylbenzene** was purchased from Sigma-Aldrich and used as received.  
**Pent-1-yne** was purchased from Oakwood and used as received.  
**Sodium tert-Butoxide** was purchased from Strem and used as received.  
**Sodium perborate tetrahydrate** was purchased from EMD Millipore and used as received.  
**SIMes-CuCl** was prepared in accordance with literature procedures.<sup>3</sup>  
**Silver triflate** was purchased from Strem and used as received.  
**p-Toluenesulfonyl chloride** was purchased from Alfa Aesar and used as received.  
**(1,3,5-trimesityl-1λ 1-pyridin-2-yl)copper chloride** was prepared in accordance with literature procedures.<sup>4</sup>  
**Trimethyl(prop-1-yn-1-yl)silane** was purchased from Alfa Aesar and used as received.

### General Procedures:

#### General procedure A: Heteroarylboration of internal alkynes and heteroaryl bromides

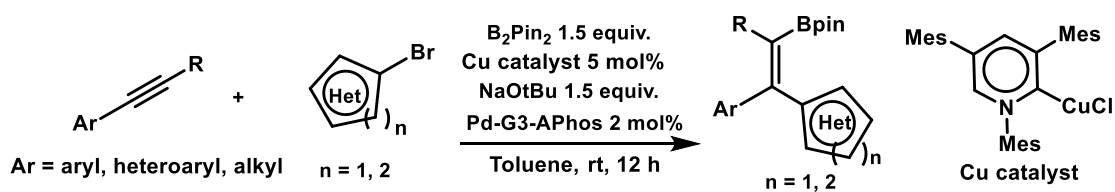

In an N<sub>2</sub>-filled glovebox, to a 13 x 100 mm screw-capped vial was added Cu catalyst (7.96 mg, 15.0 μmol, 5.00 mol %), Aphos-Pd-G3 (3.81 mg, .006 mmol, 2.00 mol %), bis(pinacolato)diboron (114.0 mg, 0.45 mmol, 1.50 equiv), and NaOt-Bu (43.0 mg, 0.45 mmol, 1.50 equiv). The vial was sealed with a septum and removed from the glovebox. In the N<sub>2</sub> atmosphere, toluene (3.00 mL) was added, followed by addition of alkynes (0.30 mmol, 1.00 equiv) and the heteroaryl bromide (1.50 equiv.). The septum was quickly exchanged for a Teflon-lined screw cap and the reaction was stirred at room temperature for 12 h. At this time, the reaction was quenched upon the addition of 1 M KOH (2.00 mL) and the mixture was extracted with EtOAc (3 x 2.00 mL). The combined organic layers were concentrated *in vacuo* and the crude material was purified by silica gel column chromatography using hexanes/EtOAc or dichloromethane/EtOAc as the eluent to obtain the desired product.

#### General procedure B: Oxidation of the vinylboronic esters to ketones

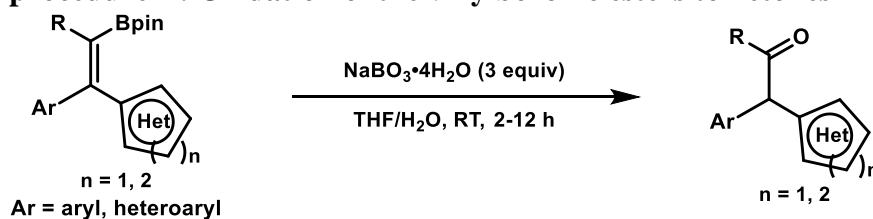

<sup>2</sup> J. H. Clotet, L. O. Viturro, S. R. Popero and P. D. Barjoan, WO2018115362, June 28, 2018.

<sup>3</sup> S. Diez-Gonzalez, E. C. Escudero-Adan, J. Benet-Buchholz, E. D. Stevens, A. M. Z. Slawinc and S. P. Nolan, *Dalton Trans.*, 2010, **39**, 7595.

<sup>4</sup> Y. Huang and M. K. Brown, *Angew. Chem. Int. Ed.*, 2019, **58**, 6048.

The purified tetrasubstituted alkene (0.20 mmol) was dissolved in THF (1.00 mL) and  $\text{NaBO}_3 \cdot 4\text{H}_2\text{O}$  (96.00 mg, 0.60 mmol, 3.0 equiv) was added, followed by addition of  $\text{H}_2\text{O}$  (1.00 mL). The reaction was allowed to stir at room temperature for 2-12 h until complete conversion was observed by TLC analysis then was quenched upon the addition of aqueous saturated  $\text{Na}_2\text{S}_2\text{O}_3$  (3 mL) and extracted with  $\text{Et}_2\text{O}$  (3 x 2 mL). The combined organic layers were washed with 2 M  $\text{HCl}$  (3 x 3 mL), dried over  $\text{Na}_2\text{SO}_4$ , gravity filtered, and concentrated *in vacuo*. The residue was purified via silica gel chromatography (hexanes/ $\text{EtOAc}$ ) to afford the desired ketone.

#### Characterization Data:

##### (E)-2-methoxy-5-(1-phenyl-2-(4,4,5,5-tetramethyl-1,3,2-dioxaborolan-2-yl)prop-1-en-1-yl)pyridine

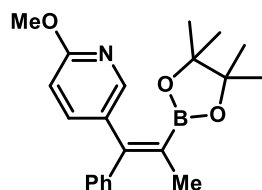

The title compound was prepared according to general procedure **A** to give a white solid in 95% average isolated yield. **M. P.**: 114-116 °C. **IR (neat)**: 2974 (w), 2941 (w), 2852 (w), 1599 (m), 1493 (m), 1286 (m), 1109 (m), 843 (m)  $\text{cm}^{-1}$ .  **$^1\text{H}$  NMR** (400 MHz,  $\text{CDCl}_3$ )  $\delta$  8.01 (dd,  $J$  = 2.4, 0.7 Hz, 1H), 7.34 – 7.19 (m, 4H), 7.10 (s, 2H), 6.57 (dd,  $J$  = 8.5, 0.7 Hz, 1H), 3.89 (s, 3H), 1.85 (s, 3H), 1.16 (s, 12H).  **$^{13}\text{C}$  NMR** (100 MHz,  $\text{CDCl}_3$ )  $\delta$  163.2, 148.1, 146.5, 141.4, 139.4, 133.6, 129.5, 127.9, 126.9, 109.5, 83.4, 53.3, 24.6, 19.2. **HRMS (EI+)**: Calcd for  $\text{C}_{21}\text{H}_{26}\text{O}_3\text{NB}$  ( $\text{M}^+$ ): 351.2006, Found 351.2005.

##### (E)-5-(1,2-diphenyl-2-(4,4,5,5-tetramethyl-1,3,2-dioxaborolan-2-yl)vinyl)-2-methoxy-pyridine

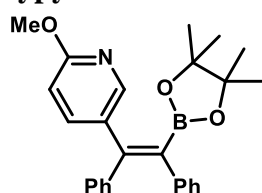

The title compound was prepared according to general procedure **A** to give a white solid in 79% average isolated yield. **M. P.**: 158-160 °C. **IR (neat)**: 2975 (w), 2923 (w), 2849 (w), 1596 (m), 1491 (m), 1109 (m), 825 (m)  $\text{cm}^{-1}$ .  **$^1\text{H}$  NMR** (400 MHz,  $\text{CDCl}_3$ )  $\delta$  8.21 (dd,  $J$  = 2.5, 0.7 Hz, 1H), 7.37 (dd,  $J$  = 8.5, 2.5 Hz, 1H), 7.15 – 6.98 (m, 8H), 6.98 – 6.83 (m, 2H), 6.64 (dd,  $J$  = 8.5, 0.7 Hz, 1H), 3.93 (s, 3H), 1.14 (s, 12H).  **$^{13}\text{C}$  NMR** (100 MHz,  $\text{CDCl}_3$ )  $\delta$  163.7, 148.1, 146.8, 141.4, 141.3, 139.8, 133.8, 130.8, 129.5, 127.9, 127.6, 127.0, 125.9, 109.9, 83.8, 53.4, 24.5. **HRMS (EI+)**: Calcd for  $\text{C}_{26}\text{H}_{28}\text{O}_3\text{NB}$  ( $\text{M}^+$ ): 413.2162, Found 413.2162.

##### (Z)-2-methoxy-5-(2-(4,4,5,5-tetramethyl-1,3,2-dioxaborolan-2-yl)-1-(trimethylsilyl)prop-1-en-1-yl)pyridine

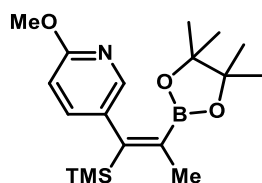

The title compound was prepared according to general procedure **A** to give a colourless liquid in 86% average isolated yield. **IR (neat)**: 2976 (w), 2949 (w), 2898 (w), 1597(m), 1486 (m), 1300 (m), 1117 (m), 837 (m)  $\text{cm}^{-1}$ .  **$^1\text{H}$  NMR** (400 MHz,  $\text{CDCl}_3$ )  $\delta$  7.73 – 7.47 (m, 1H), 7.13 (dd,  $J$  = 8.4, 2.5 Hz, 1H), 6.53 (dd,  $J$  = 8.4, 0.7 Hz, 1H), 3.81 (s, 3H), 1.93 (s, 3H), 0.93 (s, 12H), 0.00 (s, 9H).  **$^{13}\text{C}$  NMR** (100 MHz,  $\text{CDCl}_3$ )  $\delta$  162.2, 150.5, 144.5, 138.4, 135.5, 109.0, 83.1, 53.1, 24.4, 20.5, 0.21. **HRMS (EI+)**: Calcd for  $\text{C}_{18}\text{H}_{30}\text{O}_3\text{NBSi}$  ( $\text{M}^+$ ): 347.2088, Found 347.2083.

**(E)-2-methoxy-5-(4-(4,4,5,5-tetramethyl-1,3,2-dioxaborolan-2-yl)hex-3-en-3-yl)pyridine**

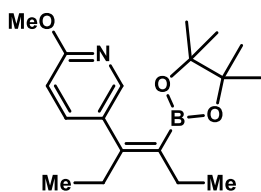

The title compound was prepared according to general procedure **A** to give a colorless liquid in 79% average isolated yield. **IR (neat)**: 2979 (w), 2932 (w), 2871 (w), 1598 (m), 1488 (m), 1359 (m), 1280 (m), 1028 (m), 829 (m), 731 (m)  $\text{cm}^{-1}$ .  **$^1\text{H}$  NMR** (400 MHz,  $\text{CDCl}_3$ )  $\delta$  7.90 (d,  $J$  = 2.4 Hz, 1H), 7.41 (dd,  $J$  = 8.4, 2.4 Hz, 1H), 6.63 (dd,  $J$  = 8.4, 0.7 Hz, 1H), 3.89 (s, 3H), 2.38 (q,  $J$  = 7.5 Hz, 2H), 2.27 (q,  $J$  = 7.5 Hz, 2H), 1.04 (s, 12H), 1.02 (t,  $J$  = 7.5 Hz, 3H), 0.85 (t,  $J$  = 7.5 Hz, 3H).  **$^{13}\text{C}$  NMR** (100 MHz,  $\text{CDCl}_3$ )  $\delta$  163.0, 148.7, 146.0, 138.5, 133.5, 109.3, 83.0, 53.3, 26.2, 24.5, 24.2, 14.5, 12.7. **HRMS (EI+)**: Calcd for  $\text{C}_{18}\text{H}_{28}\text{O}_3\text{NB}$  ( $\text{M}^+$ ): 317.2162, Found 317.2163

**tert-butyl-(E)-(3-(6-methoxypyridin-3-yl)-3-phenyl-2-(4,4,5,5-tetramethyl-1,3,2-dioxaborolan-2-yl)allyl)carbamate**

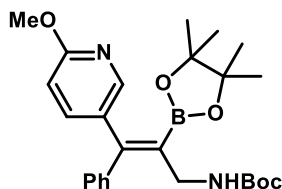

The title compound was prepared according to general procedure **A** (the reaction was run at 45 °C) to give a pale yellow solid in 56% average isolated yield. **M. P.**: 125-127 °C. **IR (neat)**: 3429 (w), 2976 (w), 2930 (w), 2879(w), 1705 (s), 1602 (m), 1487 (m), 1357 (m), 1116 (s), 1028 (m), 841 (m)  $\text{cm}^{-1}$ .  **$^1\text{H}$  NMR** (400 MHz,  $\text{CDCl}_3$ )  $\delta$  7.99 (d,  $J$  = 2.0 Hz, 1H), 7.36 – 7.12 (m, 4H), 7.10 – 6.91 (m, 2H), 6.53 (dd,  $J$  = 8.6, 1.6 Hz, 1H), 4.74 (s, 1H), 3.87 (s, 2H), 3.83 (s, 3H), 1.34 (s, 9H), 1.21 – 1.06 (m, 12H).  **$^{13}\text{C}$  NMR** (100 MHz,  $\text{CDCl}_3$ )  $\delta$  162.4, 154.2, 148.6, 145.4, 138.3, 131.6, 127.9, 127.2, 126.5, 108.6, 82.7, 77.8, 52.3, 41.9, 27.2, 23.5, 23.4. **HRMS (EI+)**: Calcd for  $\text{C}_{26}\text{H}_{36}\text{O}_5\text{N}_2\text{B}$  ( $\text{M}+\text{H}^+$ ): 467.2717, Found 467.2710.

**5,5'-(2-(4,4,5,5-tetramethyl-1,3,2-dioxaborolan-2-yl)pent-1-ene-1,1-diyl)bis(2-methoxypyridine)**

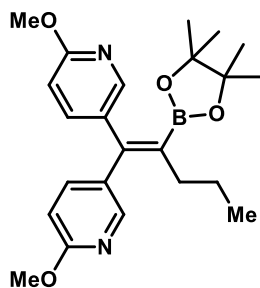

The title compound was prepared according to general procedure **A** to give a pale yellow liquid in 45% average isolated yield. **IR (neat)**: 2976 (w), 2932 (w), 2852 (w), 1599 (w), 1488 (s), 1279 (s), 1126 (s), 1020 (s), 870 (m)  $\text{cm}^{-1}$ .  **$^1\text{H}$  NMR** (400 MHz,  $\text{CDCl}_3$ )  $\delta$  7.98 (m, 2H), 7.34 – 7.07 (m, 2H), 6.77 – 6.63 (m, 1H), 6.61 – 6.48 (m, 1H), 3.90 (s, 3H), 3.87 (s, 3H), 2.44 – 2.10 (m, 2H), 1.66 – 1.37 (m, 2H), 1.13 (s, 12H), 0.87 (t,  $J$  = 7.3 Hz, 3H).  **$^{13}\text{C}$  NMR** (100 MHz,  $\text{CDCl}_3$ )  $\delta$  162.9, 146.5, 142.5, 140.9, 139.6, 136.0, 130.0, 128.9, 111.1, 110.1, 83.5, 53.3, 35.1, 24.7, 24.7, 23.3, 14.3. **HRMS (EI+)**: Calcd for  $\text{C}_{23}\text{H}_{31}\text{O}_4\text{N}_2\text{B}$  ( $\text{M}^+$ ): 410.2377, Found 410.2378.

**(E)-5-(1-(furan-3-yl)-2-(4,4,5,5-tetramethyl-1,3,2-dioxaborolan-2-yl)pent-1-en-1-yl)-2-methoxypyridine**

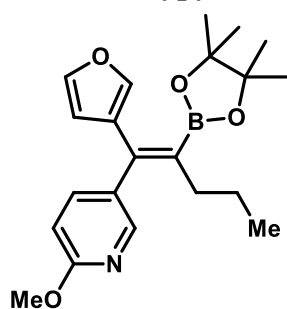

The title compound was prepared according to general procedure **A** to give a white solid in 64% average isolated yield. **M. P.**: 108-111 °C. **IR (neat)**: 2971 (w), 2932 (w), 2852 (w), 1598 (w), 1489 (s), 1282 (s), 1124 (s), 1015 (s), 836 (m)  $\text{cm}^{-1}$ .  **$^1\text{H}$  NMR** (400 MHz,  $\text{CDCl}_3$ )  $\delta$  7.99 (dd,  $J$  = 2.4, 0.8 Hz, 1H), 7.36 – 7.09 (m, 3H), 6.67 (dd,  $J$  = 8.5, 0.8 Hz, 1H), 6.23 (dd,  $J$  = 1.9, 0.8 Hz, 1H), 3.92 (s, 3H), 2.18 – 2.05 (m, 2H), 1.50 – 1.38 (m, 2H), 1.22 (s, 12H), 0.84 (t,  $J$  = 7.3 Hz, 3H).  **$^{13}\text{C}$  NMR** (100 MHz,  $\text{CDCl}_3$ )  $\delta$  163.3, 163.0, 146.7, 146.5, 143.4, 139.7, 139.3, 133.3, 130.3, 110.3, 109.7, 83.5, 53.4, 53.3, 35.7, 24.6, 23.5, 14.3. **HRMS (EI+)**: Calcd for  $\text{C}_{21}\text{H}_{28}\text{O}_4\text{NB}$  ( $\text{M}^+$ ): 369.2111, Found 369.2114.

**tert-butyl-(Z)-6-(3-(((tert-butyldiphenylsilyl)oxy)-1-(2-methoxypyridin-4-yl)-2-(4,4,5,5-tetramethyl-1,3,2-dioxaborolan-2-yl)prop-1-en-1-yl)-1H-indole-1-carboxylate**

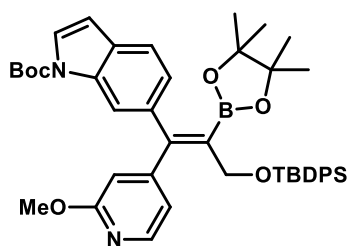

The title compound was prepared according to general procedure **A** to give a colorless oil containing product and 5% impurity (small peaks in 0.8-1.5 ppm region). **IR (neat)**: 2975 (w), 2918 (w), 2856 (w), 1732 (s), 1599 (m), 1305 (s), 1120 (s), 1042(s), 820 (m), 725 (s)  $\text{cm}^{-1}$ .  **$^1\text{H}$  NMR** (400 MHz,  $\text{CDCl}_3$ )  $\delta$  7.90 (m, 2H), 7.72 – 7.61 (m, 4H), 7.56 (d,  $J$  = 3.7 Hz, 1H), 7.49 – 7.27 (m, 7H), 7.10 (m, 1H), 6.58 – 6.35 (m, 3H), 4.30 (s, 2H), 3.86 (s, 3H), 1.56 (s, 9H), 1.10 (s, 12H), 1.03 (s, 9H).  **$^{13}\text{C}$  NMR** (100 MHz,  $\text{CDCl}_3$ )  $\delta$  164.0, 152.4, 149.6, 146.3, 138.5, 135.6, 134.7, 133.5, 130.1, 129.4, 127.4, 126.4, 124.0, 120.1, 117.5, 116.3, 110.9, 107.0, 83.5, 65.4, 53.2, 28.0, 26.9, 24.8, 19.2. **HRMS (ESI+)**: Calcd for  $\text{C}_{44}\text{H}_{53}\text{O}_6\text{N}_2\text{BSi}$  ( $\text{M}+\text{H}^+$ ): 745.3839, Found: 745.3847.

**(E)-2-methoxy-5-(1-(4-methoxyphenyl)-3-phenyl-2-(4,4,5,5-tetramethyl-1,3,2-dioxaborolan-2-yl)prop-1-en-1-yl)pyridine**

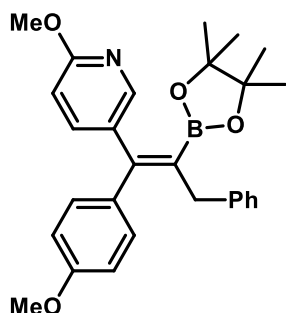

The title compound was prepared according to general procedure **A** to give a white solid in 73% average isolated yield. **M. P.**: 111-116 °C. **IR (neat)**: 3059 (w), 3026 (w), 2977 (m), 1600 (s), 1352 (s)  $\text{cm}^{-1}$ .  **$^1\text{H}$  NMR** (400 MHz,  $\text{CDCl}_3$ )  $\delta$  8.12 – 8.00 (m, 1H), 7.35 (dd,  $J$  = 8.5, 2.5 Hz, 1H), 7.26 (m, 4H), 7.16 (m, 1H), 7.11 – 7.05 (m, 2H), 6.85 – 6.74 (m, 2H), 6.64 – 6.57 (m, 1H), 3.90 (s, 3H), 3.76 (s, 3H), 3.65 (s, 2H), 0.91 (s, 12H).  **$^{13}\text{C}$  NMR** (100 MHz,  $\text{CDCl}_3$ )  $\delta$  163.4, 158.8, 148.6, 146.5, 141.3, 139.7, 133.8, 133.7, 130.3, 128.8, 128.2, 125.8, 113.5, 109.7, 83.4, 55.2, 53.4, 43.8, 39.5, 27.1, 24.4. **HRMS (EI+)**: Calcd for  $\text{C}_{28}\text{H}_{32}\text{BNO}_4$  ( $\text{M}^+$ ): 457.2424, Found: 457.2425.

***tert*-butyl-(*Z*)-3-(1-(6-methoxypyridin-3-yl)-3-phenyl-2-(4,4,5,5-tetramethyl-1,3,2-dioxaborolan-2-yl)prop-1-en-1-yl)-9H-carbazole-9-carboxylate**

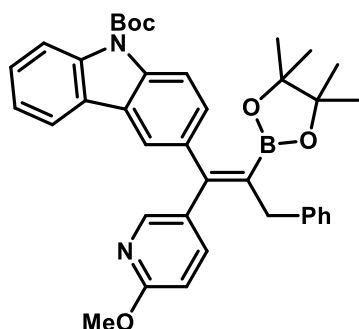

The title compound was prepared according to general procedure **A** to give a white solid in 54% average isolated yield. **M. P.**: 28.4-30.6 °C. **IR (neat)**: 3026 (w), 2976 (M), 1727 (s), 1600 (m), 1489 (m)  $\text{cm}^{-1}$ .  **$^1\text{H}$  NMR** (400 MHz,  $\text{CDCl}_3$ )  $\delta$  8.29 (d,  $J$  = 8.5 Hz, 1H), 8.20 – 8.07 (m, 2H), 7.96 – 7.81 (m, 2H), 7.44 (ddd,  $J$  = 8.5, 7.3, 1.3 Hz, 1H), 7.38 – 7.22 (m, 7H), 7.21 – 7.12 (m, 1H), 6.65 (dd,  $J$  = 8.5, 0.8 Hz, 1H), 3.91 (s, 3H), 3.71 (s, 2H), 1.73 (s, 9H), 0.83 (s, 12H).  **$^{13}\text{C}$  NMR** (100 MHz,  $\text{CDCl}_3$ )  $\delta$  163.2, 151.0, 148.5, 146.6, 140.8, 139.9, 139.2, 138.9, 137.9, 130.9, 128.9, 128.8, 128.3, 127.1, 126.0, 125.7, 125.4, 123.0, 120.6, 119.7, 116.2, 115.8, 110.5, 83.9, 83.4, 53.4, 39.8, 28.4, 24.4. **HRMS (ESI $^{+}$ )**: Calcd for  $\text{C}_{38}\text{H}_{42}\text{BN}_2\text{O}_5$  ( $\text{M}+\text{H}^{+}$ ): 617.3181, Found: 617.3182.

**(*E*)-5-(1-(furan-3-yl)-3-phenyl-2-(4,4,5,5-tetramethyl-1,3,2-dioxaborolan-2-yl)prop-1-en-1-yl)-2-methoxypyridine**

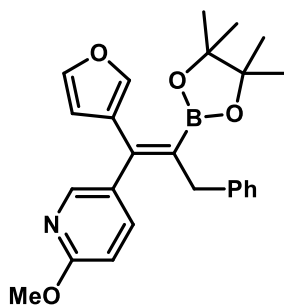

The title compound was prepared according to general procedure **A** to give a colorless oil in 51% average isolated yield. **IR (neat)**: 3004 (w), 2977 (w), 2943 (w), (w), 1732 (s), 1599 (m), 1488 (s)  $\text{cm}^{-1}$ .  **$^1\text{H}$  NMR** (400 MHz,  $\text{CDCl}_3$ )  $\delta$  8.07 (s, 1H), 7.39 (d,  $J$  = 8.5 Hz, 1H), 7.32 (m, 2H), 7.29 – 7.18 (m, 4H), 7.17 – 7.11 (m, 1H), 6.67 (d,  $J$  = 8.5 Hz, 1H), 6.39 – 6.19 (m, 1H), 3.91 (s, 3H), 3.56 (s, 2H), 0.98 (s, 12H).  **$^{13}\text{C}$  NMR** (100 MHz,  $\text{CDCl}_3$ )  $\delta$  163.2, 146.4, 142.6, 141.4, 140.4, 139.5, 137.9, 129.8, 128.9, 128.7, 128.2, 126.0, 111.1, 110.4, 83.5, 53.4, 39.1, 24.4. **HRMS (ESI $^{+}$ )**: Calcd for  $\text{C}_{25}\text{H}_{29}\text{BNO}_4$  ( $\text{M}+\text{H}^{+}$ ): 418.2184, Found: 418.2187.

**(*E*)-2-methoxy-5-(1-phenyl-2-(4,4,5,5-tetramethyl-1,3,2-dioxaborolan-2-yl)prop-1-en-1-yl)pyrimidine**

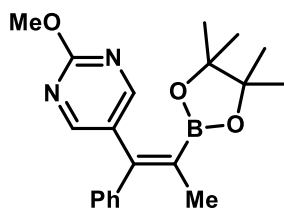

The title compound was prepared according to general procedure **A** to give a colorless oil in 66% average isolated yield. **IR (neat)**: 3053 (w), 2959 (m), 2853 (w), 1657 (s), 1474 (s)  $\text{cm}^{-1}$ .  **$^1\text{H}$  NMR** (400 MHz,  $\text{CDCl}_3$ )  $\delta$  8.21 (s, 2H), 7.34 – 7.21 (m, 3H), 7.12 – 6.98 (m, 2H), 3.93 (s, 3H), 1.82 (s, 3H), 1.13 (s, 12H).  **$^{13}\text{C}$  NMR** (125 MHz,  $\text{CDCl}_3$ )  $\delta$  164.5, 159.0, 145.9, 140.9, 131.6, 129.4, 128.3, 127.4, 83.7, 54.9, 29.7, 24.7, 19.5. **HRMS (ESI)**: Calcd for  $\text{C}_{20}\text{H}_{26}\text{BN}_2\text{O}_3$  ( $\text{M}+\text{H}^{+}$ ): 353.2035, Found 353.2033.

**(Z)-2-methoxy-5-(2-(4,4,5,5-tetramethyl-1,3,2-dioxaborolan-2-yl)-1-(thiophen-2-yl)pent-1-en-1-yl)pyridine**

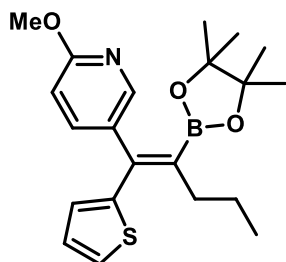

The title compound was prepared according to general procedure **A** to give a colorless oil in 63% average isolated yield. **IR** (neat): 3066 (w), 2969 (m), 2936 (m), 1582 (s), 1461 (m)  $\text{cm}^{-1}$ .  **$^1\text{H}$  NMR** (500 MHz,  $\text{CDCl}_3$ )  $\delta$  8.07 (dd,  $J$  = 2.5, 0.8 Hz, 1H), 7.44 (dd,  $J$  = 8.5, 2.5 Hz, 1H), 7.31 (dt,  $J$  = 5.1, 1.0 Hz, 1H), 7.08 – 6.94 (m, 1H), 6.84 (dd,  $J$  = 3.6, 1.3 Hz, 1H), 6.66 (dd,  $J$  = 8.5, 0.8 Hz, 1H), 3.95 (d,  $J$  = 1.3 Hz, 3H), 2.58 – 2.41 (m, 2H), 1.64 – 1.54 (m, 2H), 1.13 (s, 12H), 1.00 (t,  $J$  = 7.3 Hz, 3H).  **$^{13}\text{C}$  NMR** (125 MHz,  $\text{CDCl}_3$ )  $\delta$  163.4, 146.4, 143.6, 134.0, 139.3, 134.0, 127.7, 126.6, 126.0, 109.7, 83.5, 53.5, 35.8, 24.7, 23.4, 14.4. **HRMS** (ESI): Calcd for  $\text{C}_{21}\text{H}_{29}\text{BNO}_3\text{S}$  ( $\text{M}+\text{H}^+$ ): 386.2037, Found 386.1963.

**(E)-3-(1-phenyl-2-(4,4,5,5-tetramethyl-1,3,2-dioxaborolan-2-yl)prop-1-en-1-yl)quinoline**

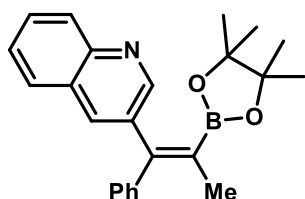

The title compound was prepared according to general procedure **A** to give a colorless oil in 50% average isolated yield. **IR** (neat): 3043 (w), 2979 (m), 2853 (w), 1617 (m), 1331 (s)  $\text{cm}^{-1}$ .  **$^1\text{H}$  NMR** (400 MHz,  $\text{CDCl}_3$ )  $\delta$  8.83 – 8.63 (m, 1H), 8.07 (d,  $J$  = 8.4 Hz, 1H), 7.90 (t,  $J$  = 1.5 Hz, 1H), 7.77 – 7.58 (m, 2H), 7.49 (t,  $J$  = 7.5 Hz, 1H), 7.32 – 7.21 (m, 3H), 7.21 – 7.08 (m, 2H), 1.94 (s, 3H), 1.08 (s, 12H).  **$^{13}\text{C}$  NMR** (100 MHz,  $\text{CDCl}_3$ )  $\delta$  151.6, 148.7, 141.2, 137.5, 135.5, 129.7, 129.1, 128.9, 128.6, 128.2, 127.8, 127.5, 127.2, 126.6, 83.6, 24.6, 19.6. **HRMS** (APCI): Calcd for  $\text{C}_{24}\text{H}_{27}\text{BNO}_2$  ( $\text{M}+\text{H}^+$ ): 372.2129, Found 372.2135.

**(E)-2-methoxy-4-(1-phenyl-2-(4,4,5,5-tetramethyl-1,3,2-dioxaborolan-2-yl)prop-1-en-1-yl)pyridine**

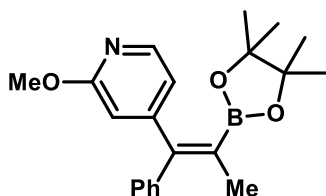

The title compound was prepared according to general procedure **A** to give a colorless oil in 78% average isolated yield. **IR** (neat): 3016 (w), 2975 (m), 2905 (w), 2341 (w), 1538 (s)  $\text{cm}^{-1}$ .  **$^1\text{H}$  NMR** (400 MHz,  $\text{CDCl}_3$ )  $\delta$  8.05 – 7.88 (m, 1H), 7.34 – 7.26 (m, 2H), 7.26 – 7.18 (m, 1H), 7.15 – 7.04 (m, 2H), 6.64 (dd,  $J$  = 5.3, 1.3 Hz, 1H), 6.60 (t,  $J$  = 1.3 Hz, 1H), 3.89 (s, 3H), 1.83 (s, 3H), 1.17 (s, 12H).  **$^{13}\text{C}$  NMR** (100 MHz,  $\text{CDCl}_3$ )  $\delta$  164.0, 154.7, 148.8, 145.9, 140.4, 129.4, 128.1, 127.1, 117.7, 111.0, 83.6, 53.3, 24.5, 19.2. **HRMS** (EI+): Calcd for  $\text{C}_{21}\text{H}_{27}\text{BNO}_3$  ( $\text{M}+\text{H}^+$ ): 352.2079, Found 352.2079.

**(E)-2-methoxy-6-(1-phenyl-2-(4,4,5,5-tetramethyl-1,3,2-dioxaborolan-2-yl)prop-1-en-1-yl)pyridine**

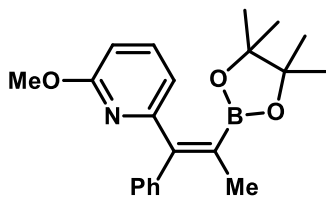

The title compound was prepared according to general procedure **A** to give a colorless oil containing the desired product and an inseparable impurity (observed at 1.20 ppm). **IR** (neat): 3054 (w), 2975 (m), 2947 (w), 2341 (m), 1597 (s)  $\text{cm}^{-1}$ .  **$^1\text{H}$  NMR** (400 MHz,  $\text{CDCl}_3$ )  $\delta$  7.56 (dd,  $J$  = 8.3, 7.6 Hz, 1H), 7.42 – 7.32 (m, 2H), 7.32 – 7.24 (m, 1H), 7.21 – 7.14 (m, 2H), 6.60 – 6.41 (m, 2H), 3.95 (s, 3H), 1.83 (s, 3H), 1.35 (s, 12H).  **$^{13}\text{C}$  NMR** (100 MHz,  $\text{CDCl}_3$ )  $\delta$  162.5, 158.4, 143.1, 136.7, 129.7, 128.3, 126.9,

111.6, 103.5, 81.1, 55.0, 27.2, 24.8, 15.9. **HRMS (ESI):** Calcd for  $C_{21}H_{27}BNO_3$  ( $M+H^+$ ): 352.2079, Found 352.2080.

### 1-(6-methoxypyridin-3-yl)-1-phenylpropan-2-one

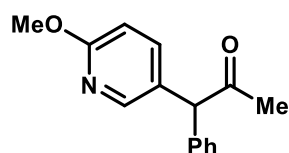

The title compound was prepared according to general procedure B to give a colorless oil in 92% isolated yield. **IR (neat):** 2945 (w), 2941 (w), 2846 (w), 1713 (s), 1604 (m), 1489 (m), 1281 (m), 1125 (m), 825 (m)  $cm^{-1}$ .  **$^1H$  NMR** (400 MHz,  $CDCl_3$ )  $\delta$  7.97 (d,  $J$  = 2.6 Hz, 1H), 7.44 (dd,  $J$  = 8.6, 2.6 Hz, 1H), 7.37 – 7.30 (m, 2H), 7.27 – 7.25 (m, 1H), 7.24 – 7.16 (m, 2H), 6.68 (d,  $J$  = 8.6 Hz, 1H), 5.00 (s, 1H), 3.88 (s, 3H), 2.21 (s, 3H).  **$^{13}C$  NMR** (100 MHz,  $CDCl_3$ )  $\delta$  205.9, 163.3, 146.6, 139.1, 137.7, 129.0, 128.6, 127.5, 126.9, 110.8, 61.5, 53.3, 29.8. **HRMS (EI+):** Calcd for  $C_{15}H_{15}O_2N$  ( $M^+$ ): 241.1103, Found: 241.1099.

### 1-(4-methoxyphenyl)-1-(6-methoxypyridin-3-yl)-3-phenylpropan-2-one

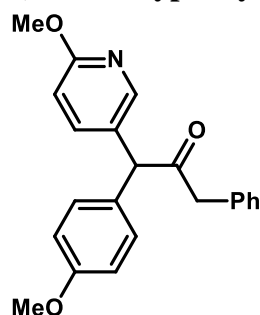

The title compound was prepared according to general procedure B to give a colorless oil in 94% average isolated yield. **IR (neat):** 3008 (m), 2954 (m), 2926 (w), 1717 (s), 1605 (m)  $cm^{-1}$ .  **$^1H$  NMR** (400 MHz,  $CDCl_3$ )  $\delta$  7.84 (d,  $J$  = 2.5 Hz, 1H), 7.42 – 7.32 (m, 1H), 7.32 – 7.20 (m, 3H), 7.16 – 7.00 (m, 4H), 6.93 – 6.82 (m, 2H), 6.65 (d,  $J$  = 8.6 Hz, 1H), 5.06 (s, 1H), 3.88 (s, 3H), 3.78 (s, 3H), 3.77 (s, 2H).  **$^{13}C$  NMR** (125 MHz,  $CDCl_3$ )  $\delta$  205.7, 163.3, 159.1, 146.6, 139.3, 133.9, 130.0, 129.5, 129.4, 128.8, 127.2, 127.1, 114.5, 110.8, 58.5, 55.3, 53.5, 49.4. **HRMS (EI+):** Calcd for  $C_{22}H_{21}NO_3$  ( $M^+$ ): 347.1521, Found: 347.1525.

### *tert*-butyl-3-(1-(6-methoxypyridin-3-yl)-2-oxo-3-phenylpropyl)-9H-carbazole-9-carboxylate

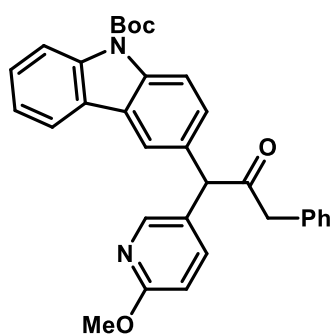

The title compound was prepared according to general procedure B to give a colorless oil in 92% isolated yield. **IR (neat):** 3061 (w), 3004 (w), 2944 (w), 1717 (s), 1604 (s)  $cm^{-1}$ .  **$^1H$  NMR** (400 MHz,  $CDCl_3$ )  $\delta$  8.27 (m, 2H), 7.98 – 7.86 (m, 2H), 7.75 (d,  $J$  = 1.9 Hz, 1H), 7.53 – 7.37 (m, 2H), 7.37 – 7.22 (m, 5H), 7.14 (m, 2H), 6.67 (d,  $J$  = 8.6 Hz, 1H), 5.29 (s, 1H), 3.89 (d,  $J$  = 1.2 Hz, 3H), 3.83 (s, 2H), 1.74 (d,  $J$  = 1.3 Hz, 9H).  **$^{13}C$  NMR** (125 MHz,  $CDCl_3$ )  $\delta$  205.7, 163.3, 151.0, 146.6, 139.4, 138.9, 137.9, 133.8, 132.1, 129.6, 128.9, 127.8, 127.5, 127.3, 127.2, 126.5, 125.3, 123.2, 119.8, 119.7, 116.9, 116.3, 110.8, 84.2, 59.1, 53.5, 49.6, 28.4. **HRMS (ESI+):** Calcd for  $C_{32}H_{31}N_2O_4$  ( $M+H^+$ ): 507.2278, Found: 507.2278.



### 1-(furan-3-yl)-1-(6-methoxypyridin-3-yl)-3-phenylpropan-2-one

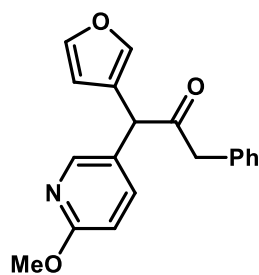

The title compound was prepared according to general procedure **B** to give a white solid in 87% isolated yield. **M. P.** 65-68 °C. **IR** (neat): 3137 (w), 3014 (w), 2991 (w), 1715 (s), 1604 (m)  $\text{cm}^{-1}$ .  **$^1\text{H}$  NMR** (500 MHz,  $\text{CDCl}_3$ )  $\delta$  8.00 (d,  $J = 2.5$  Hz, 1H), 7.43 (dd,  $J = 8.6, 2.5$  Hz, 1H), 7.40 (t,  $J = 1.7$  Hz, 1H), 7.37 – 7.31 (m, 3H), 7.32 – 7.26 (m, 1H), 7.19 – 7.12 (m, 2H), 6.72 (d,  $J = 8.6$  Hz, 1H), 6.26 – 6.21 (m, 1H), 4.99 (s, 1H), 3.95 (s, 3H), 3.82 (s, 2H).  **$^{13}\text{C}$  NMR** (125 MHz,  $\text{CDCl}_3$ )

$\delta$  204.8, 163.6, 146.6, 143.4, 140.6, 138.8, 133.6, 129.5, 128.8, 127.3, 126.3, 122.3, 111.2, 110.6, 53.5, 50.5, 48.9. **HRMS** (ESI<sup>+</sup>): Calcd for  $\text{C}_{19}\text{H}_{17}\text{NO}_3\text{Na}$  ( $\text{M}+\text{Na}^+$ ): 330.1101, Found: 330.1103.

### Control Experiments:

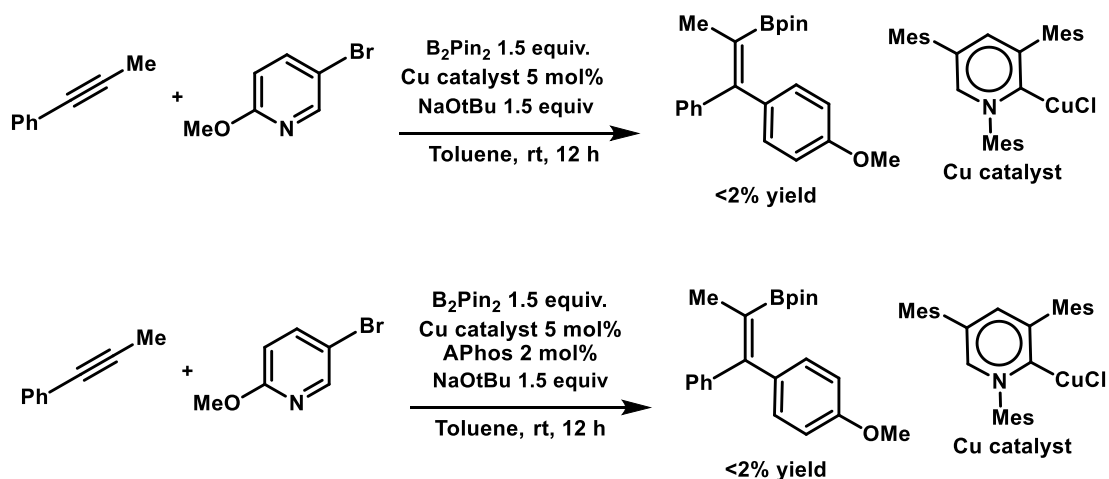

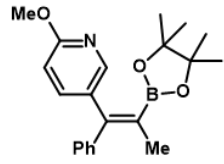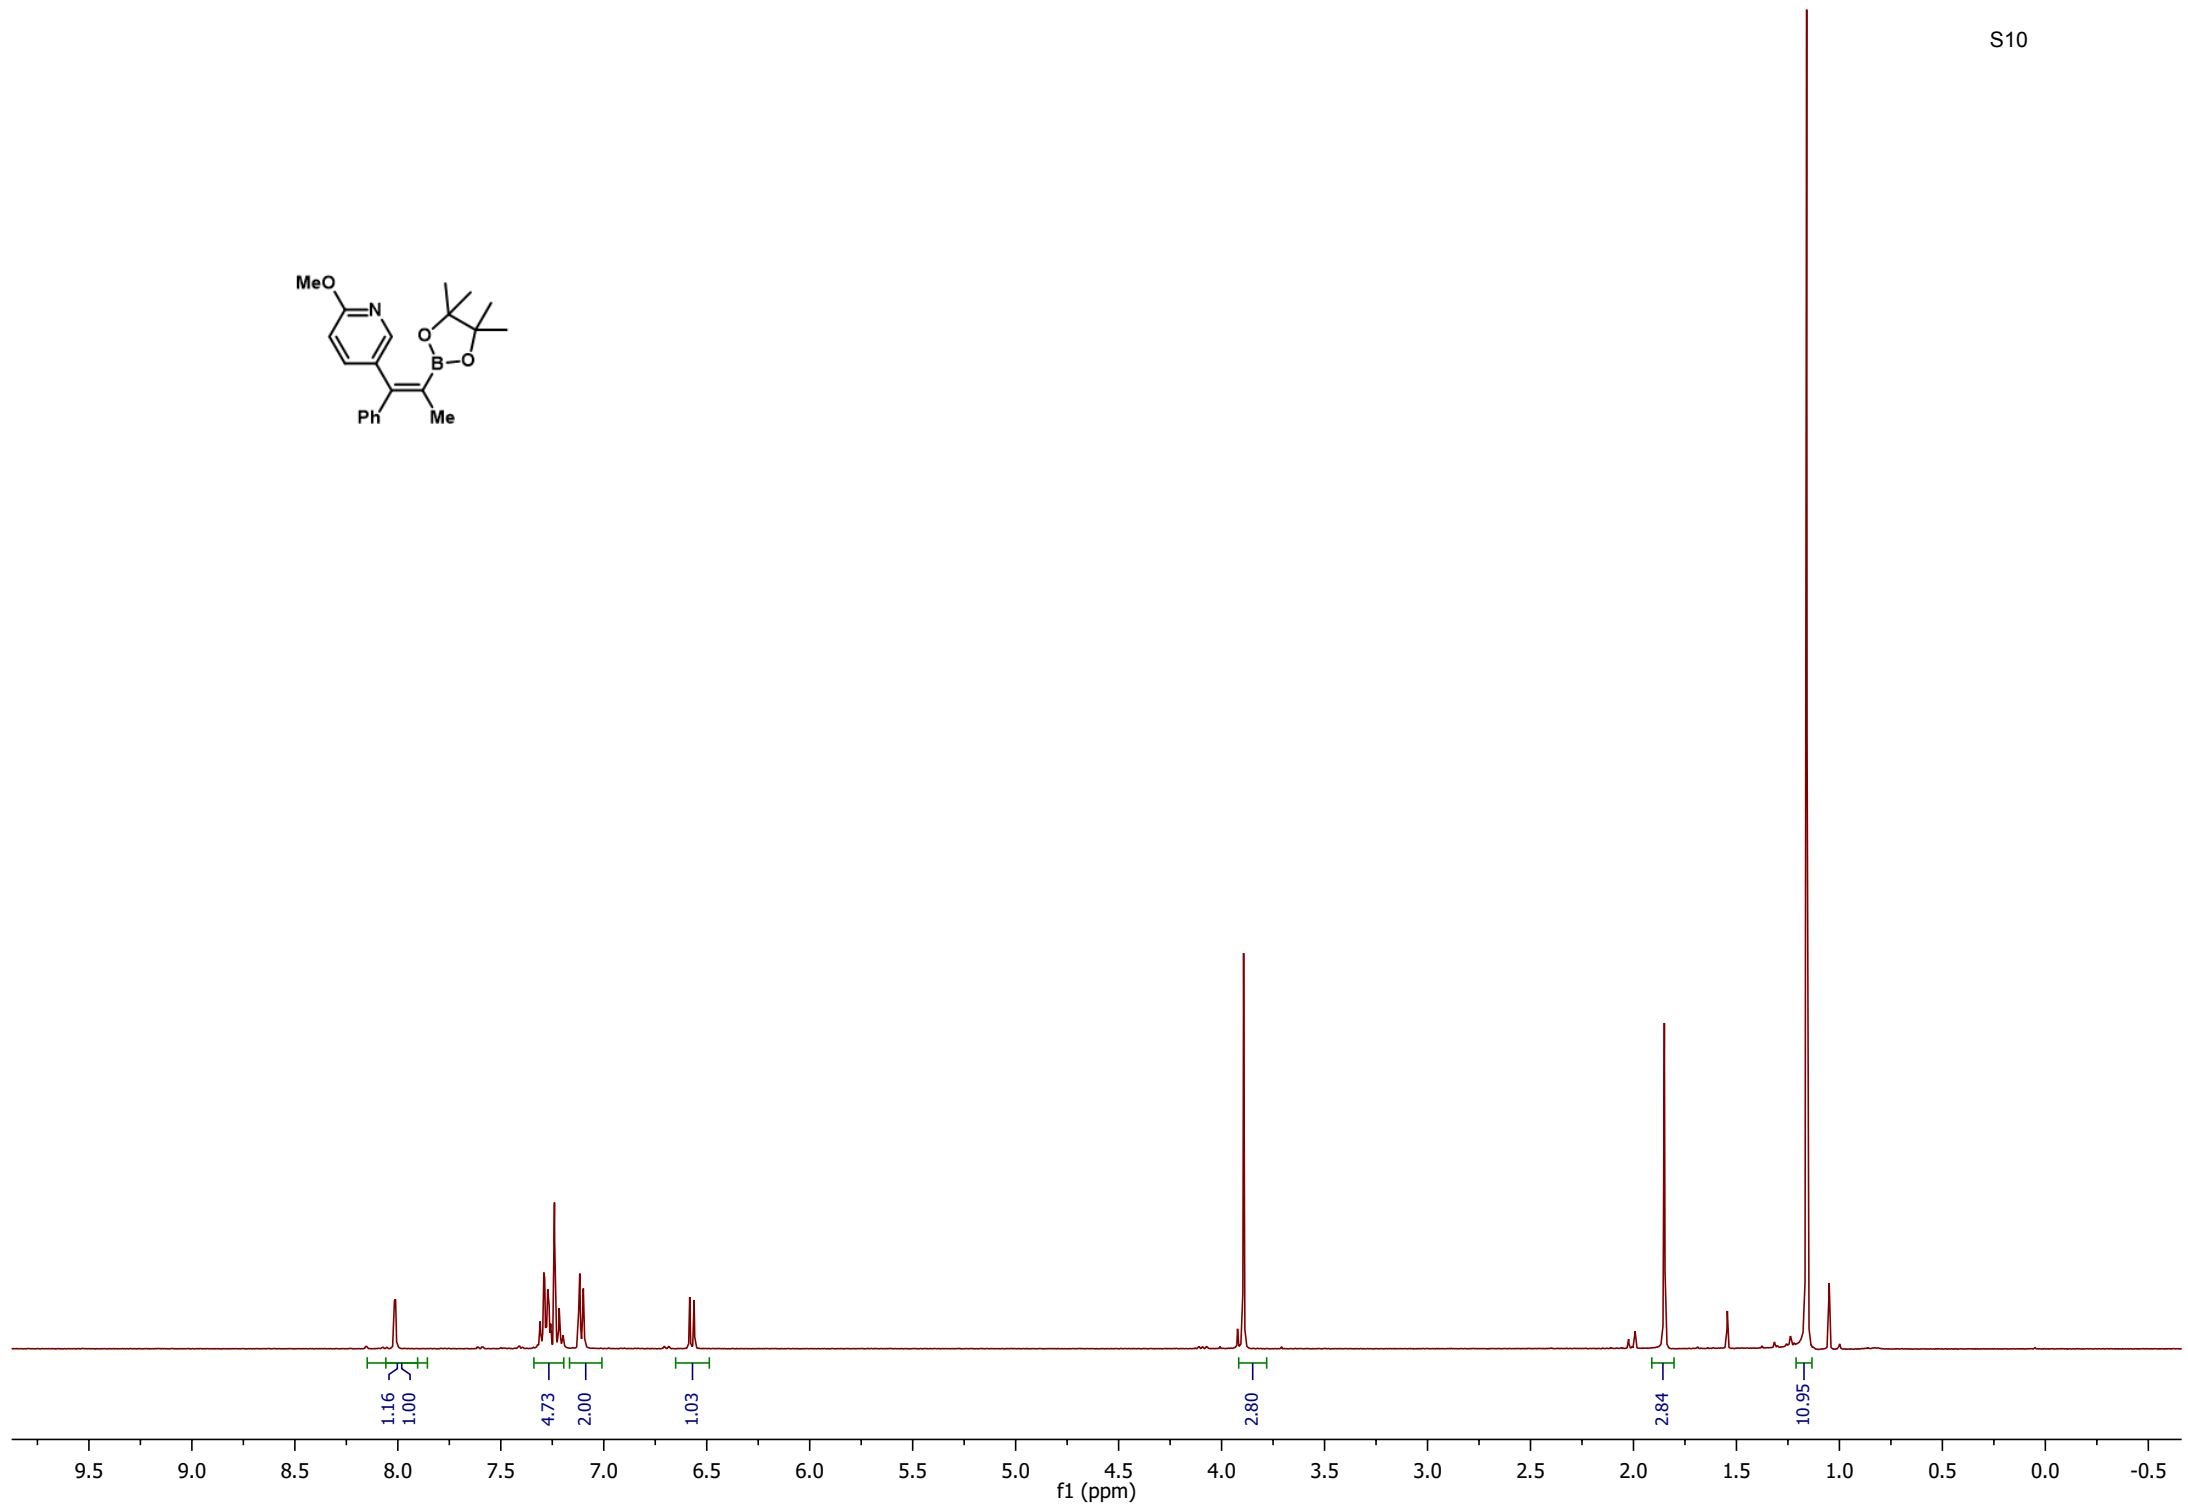

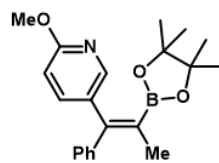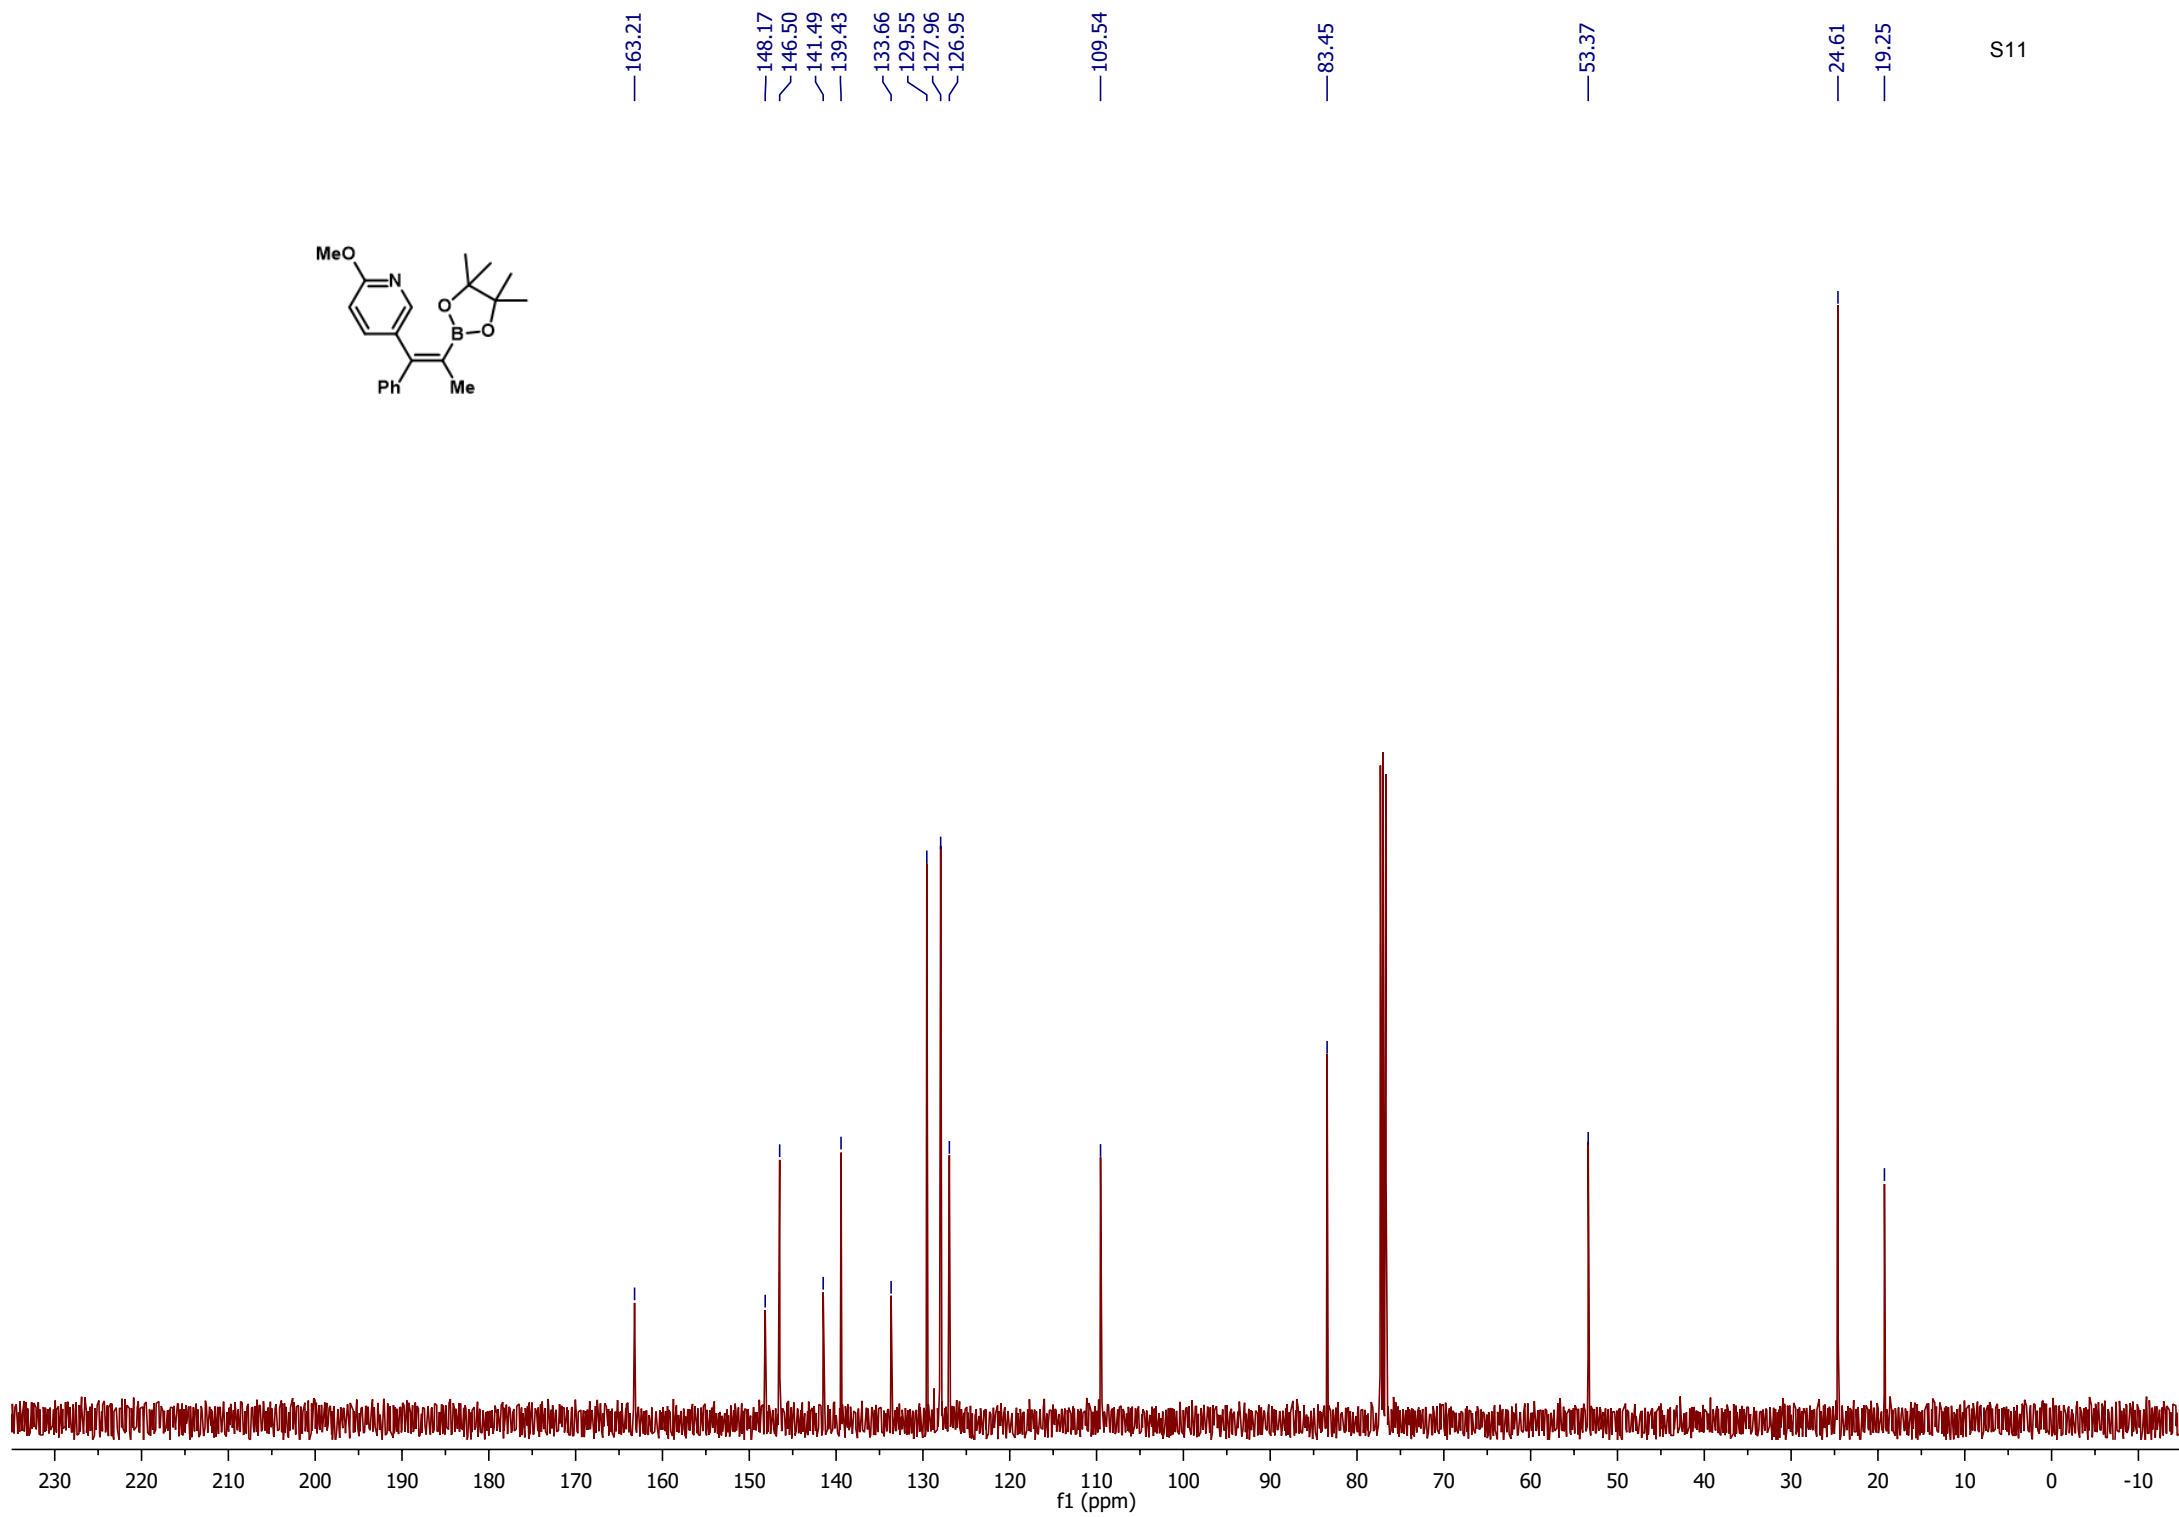

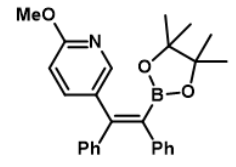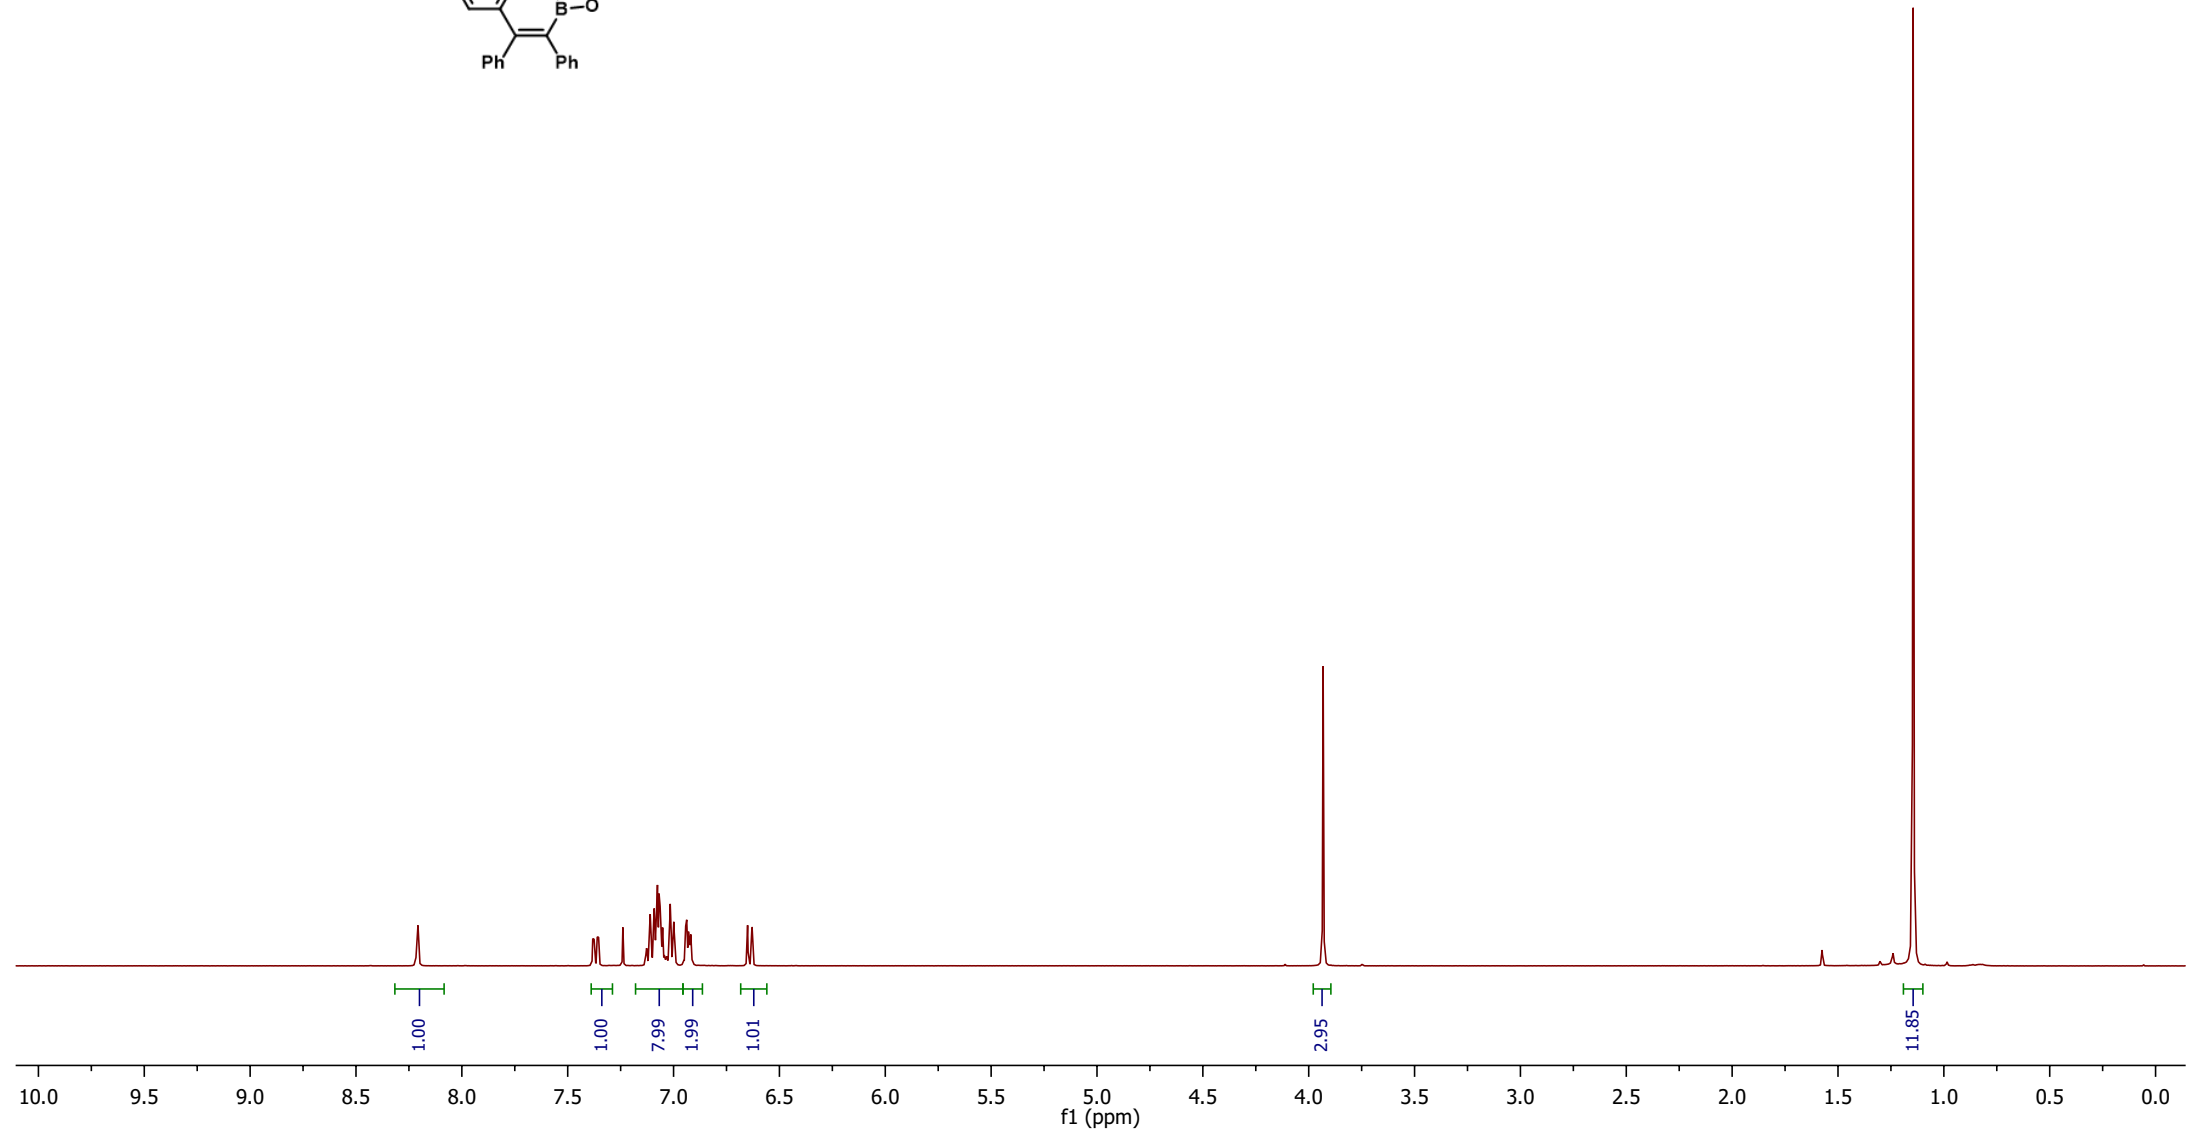

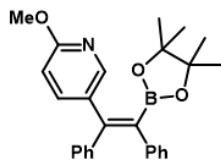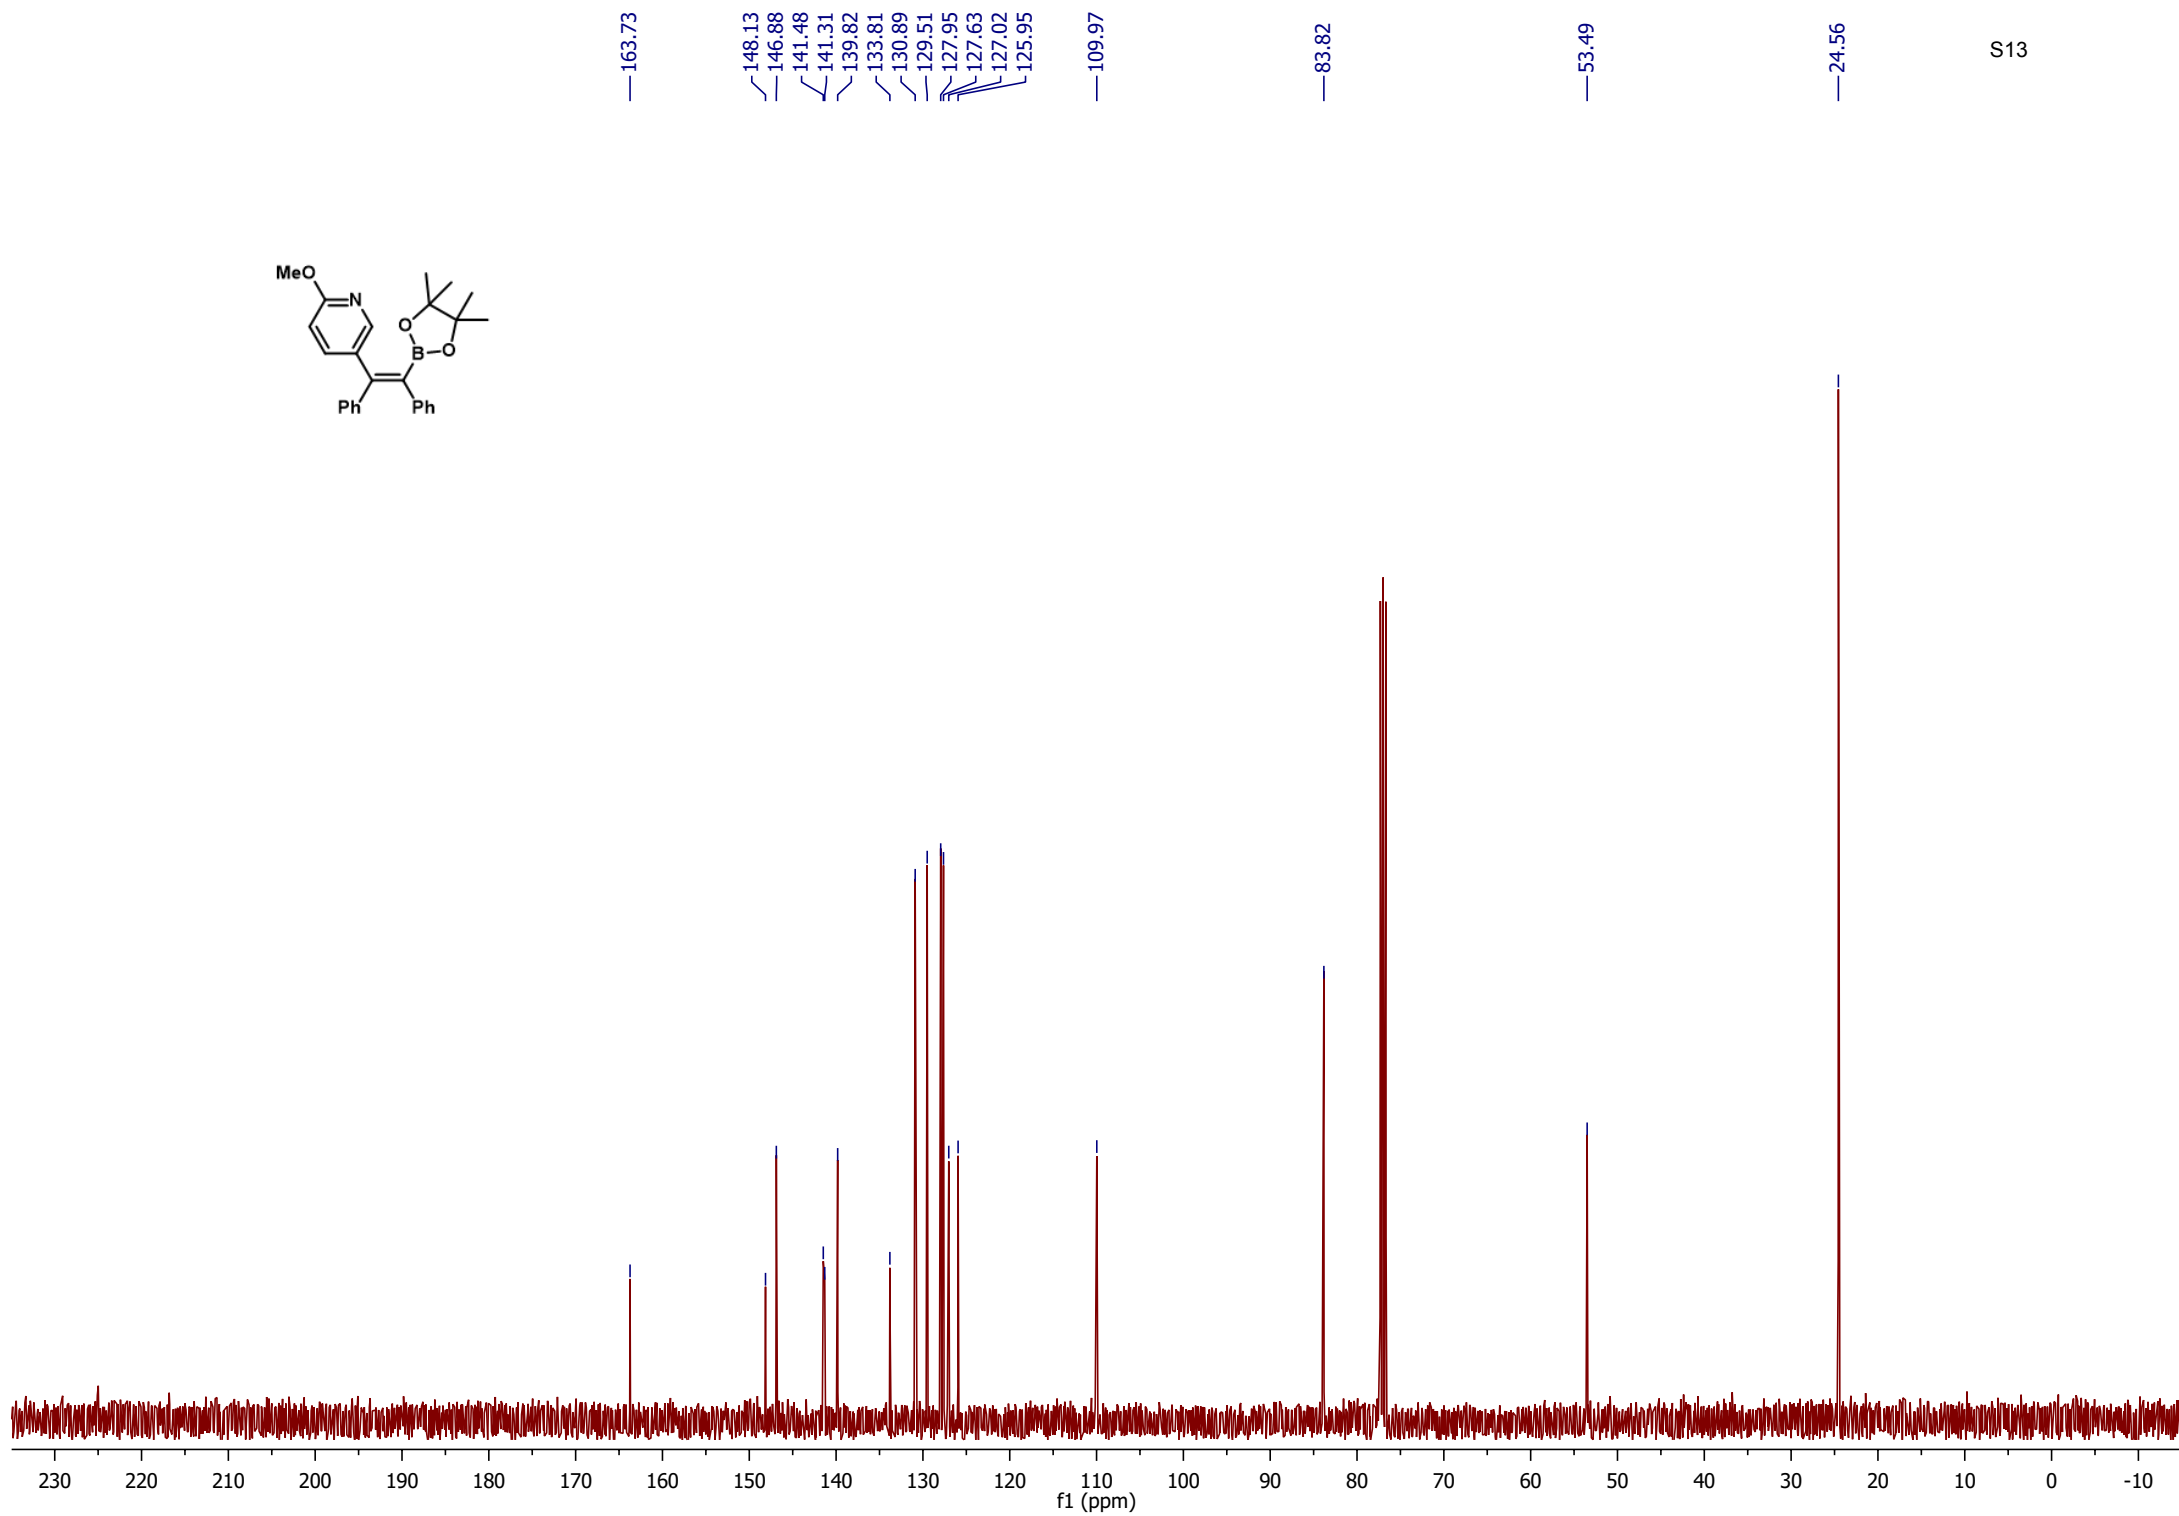

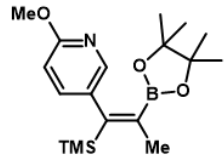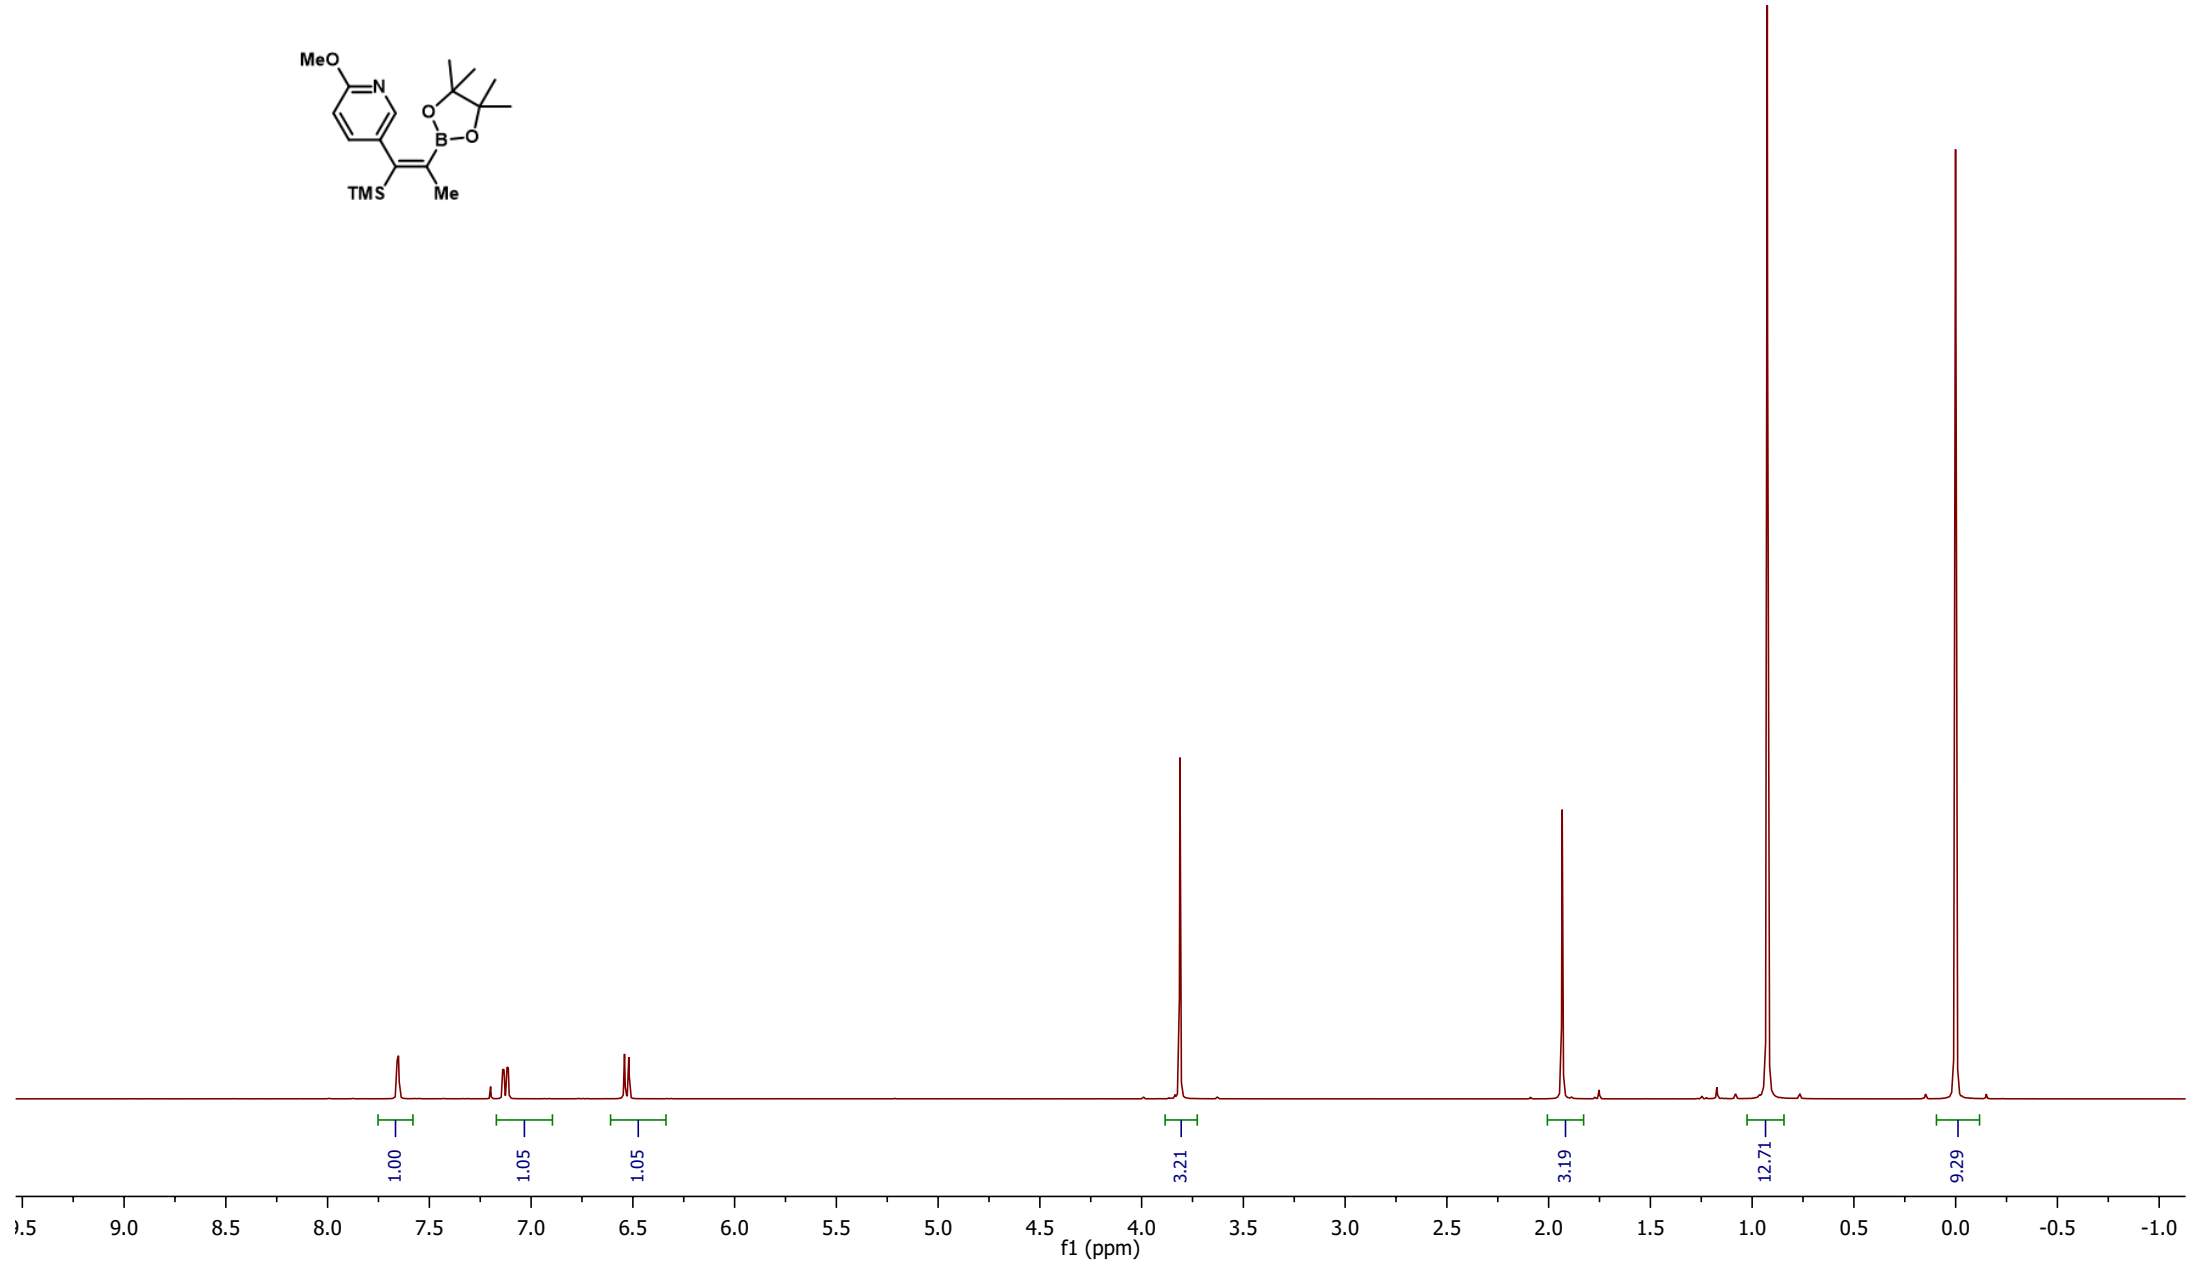

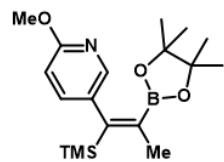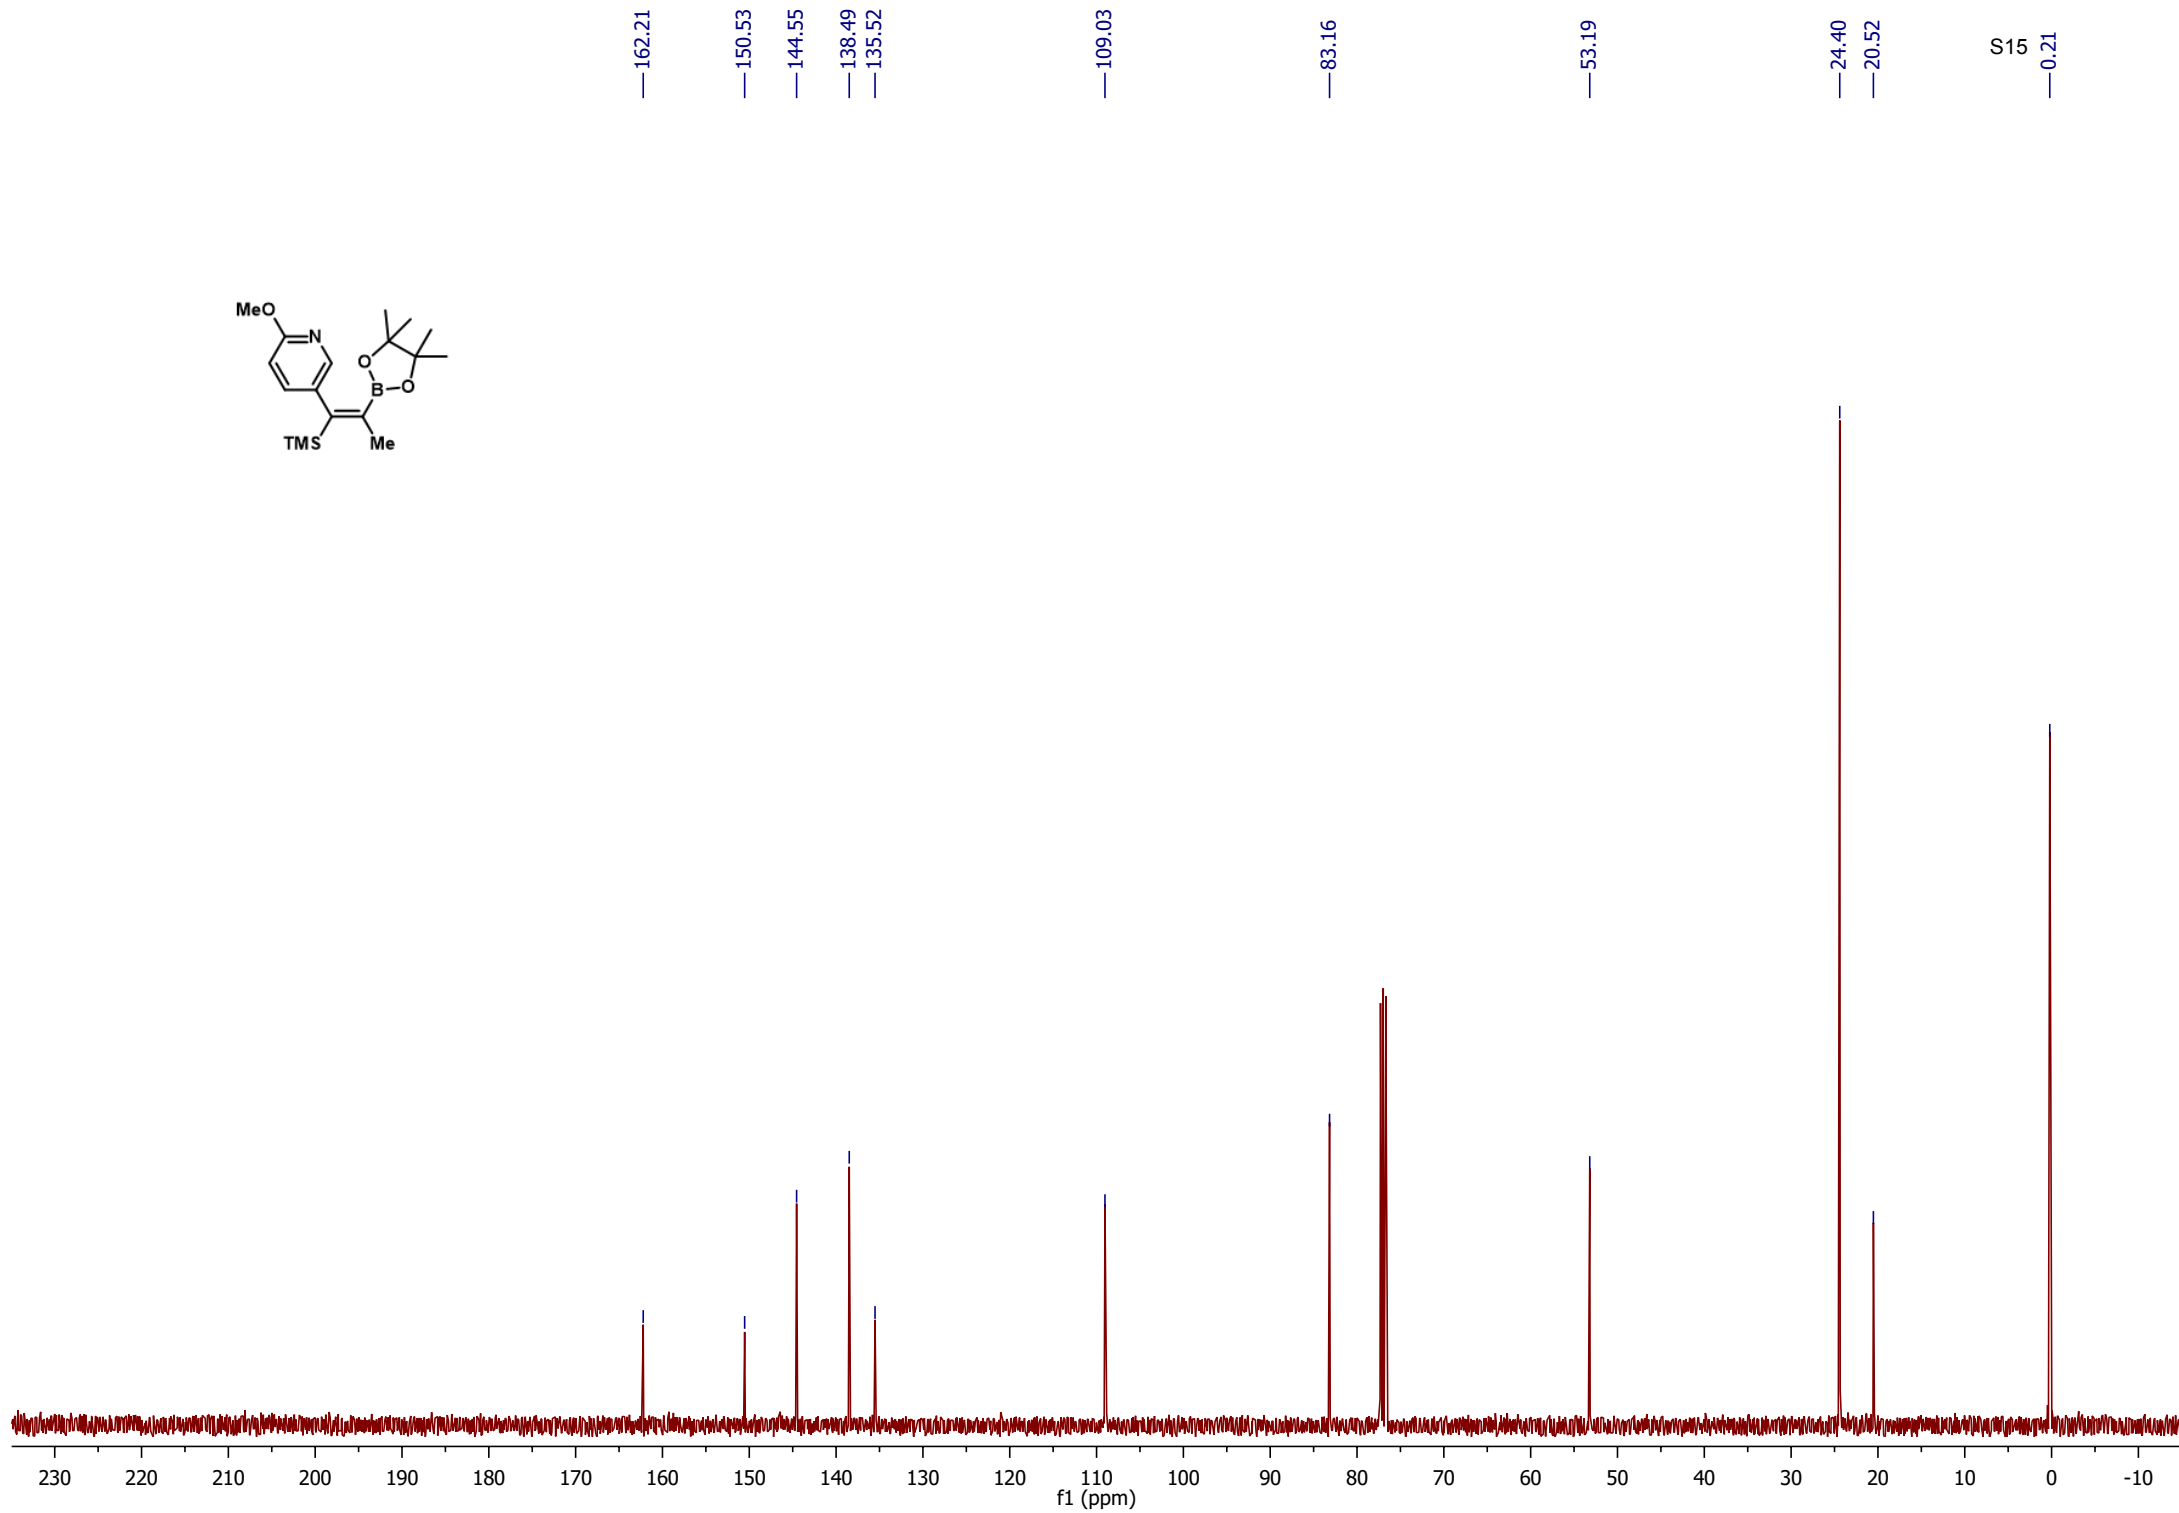

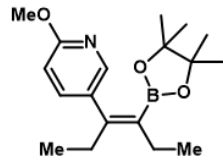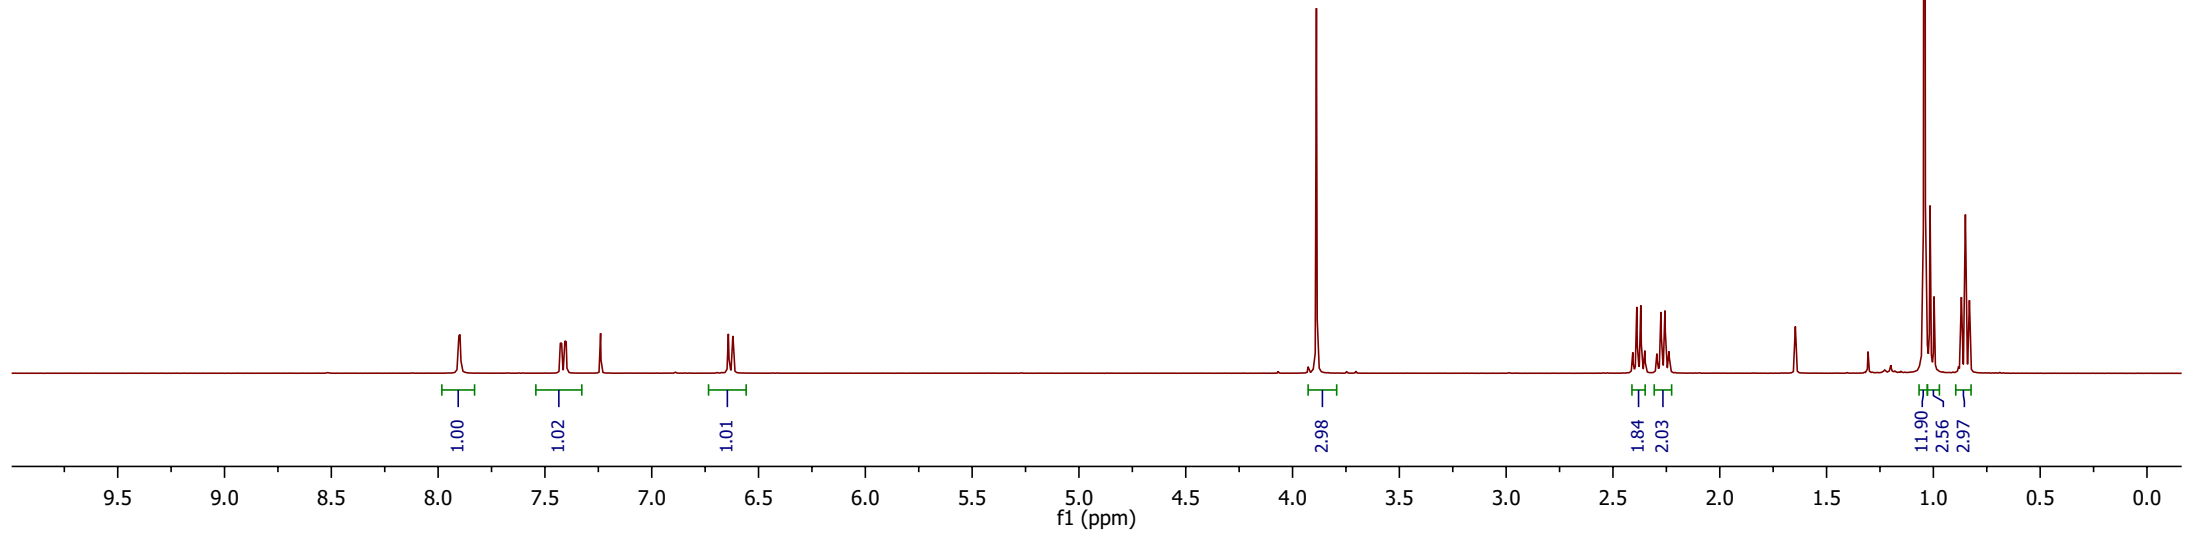



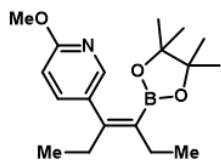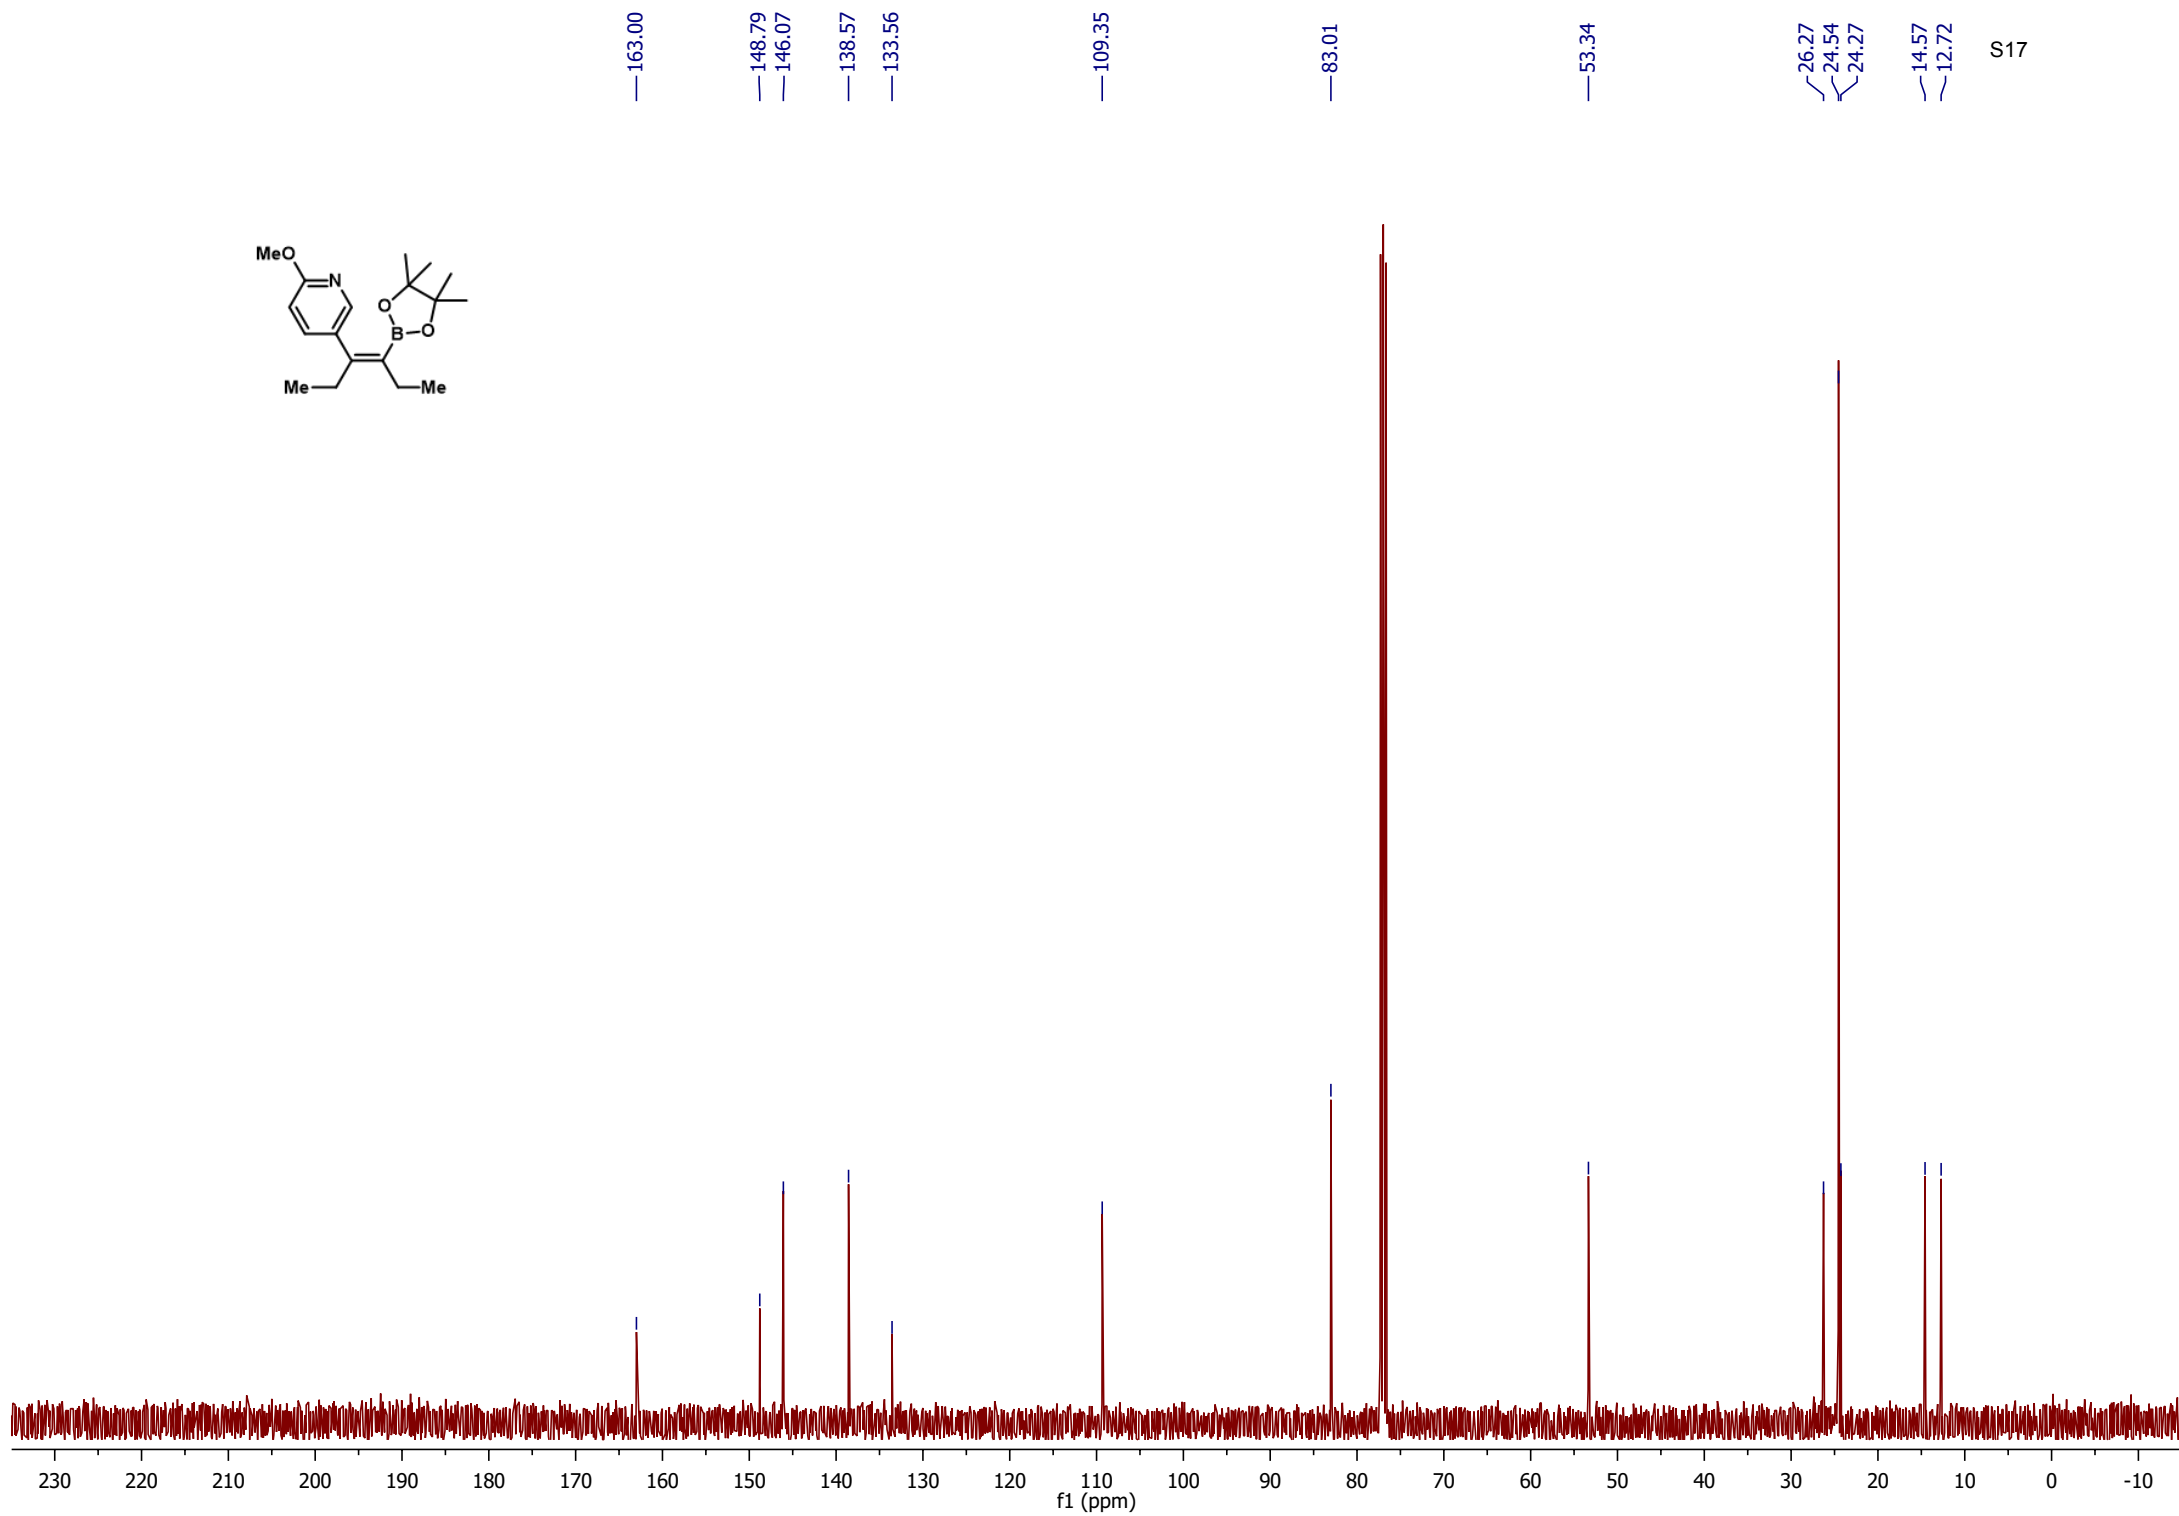

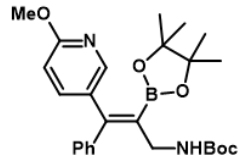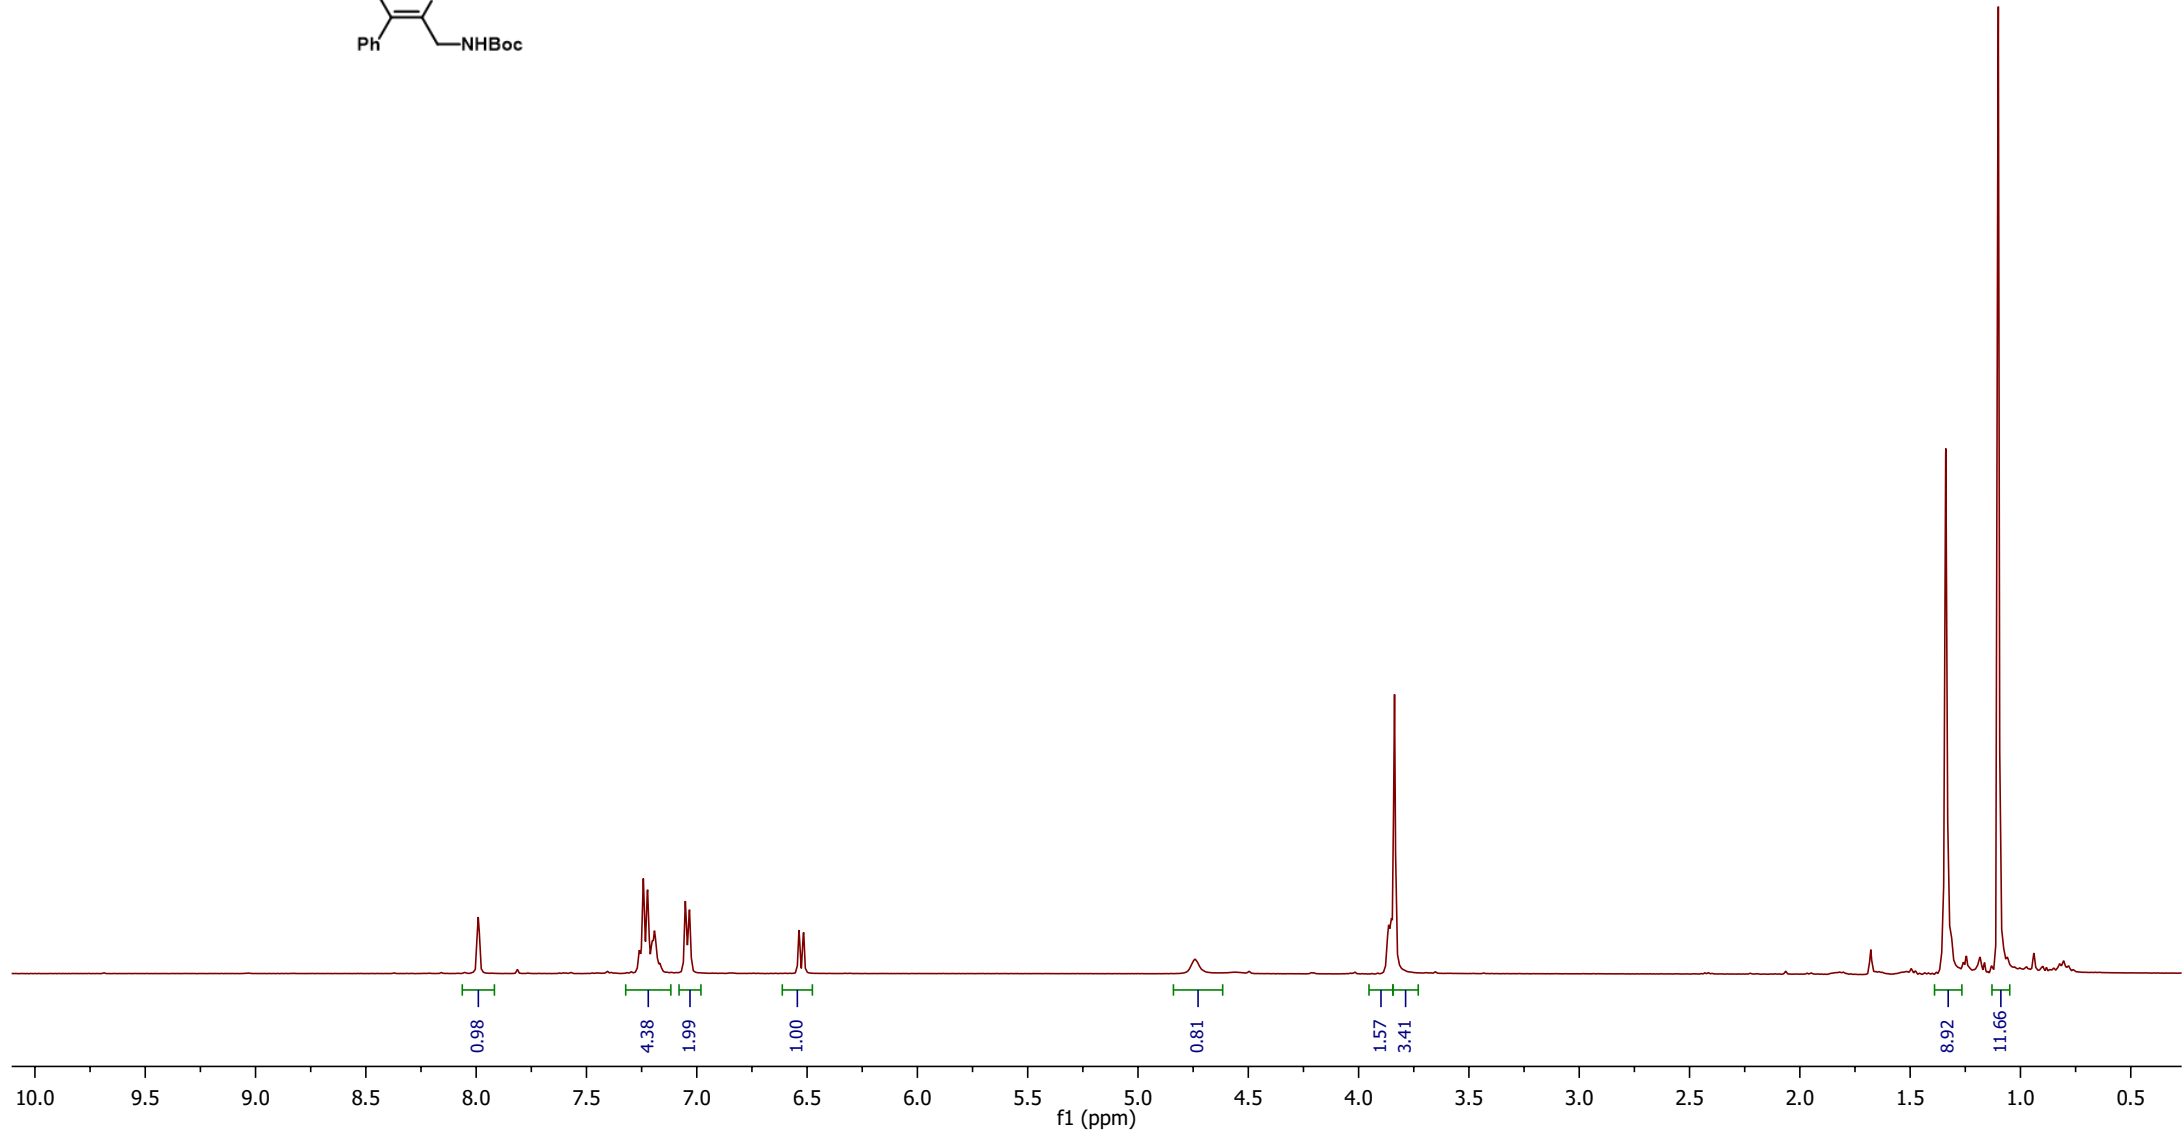

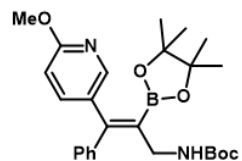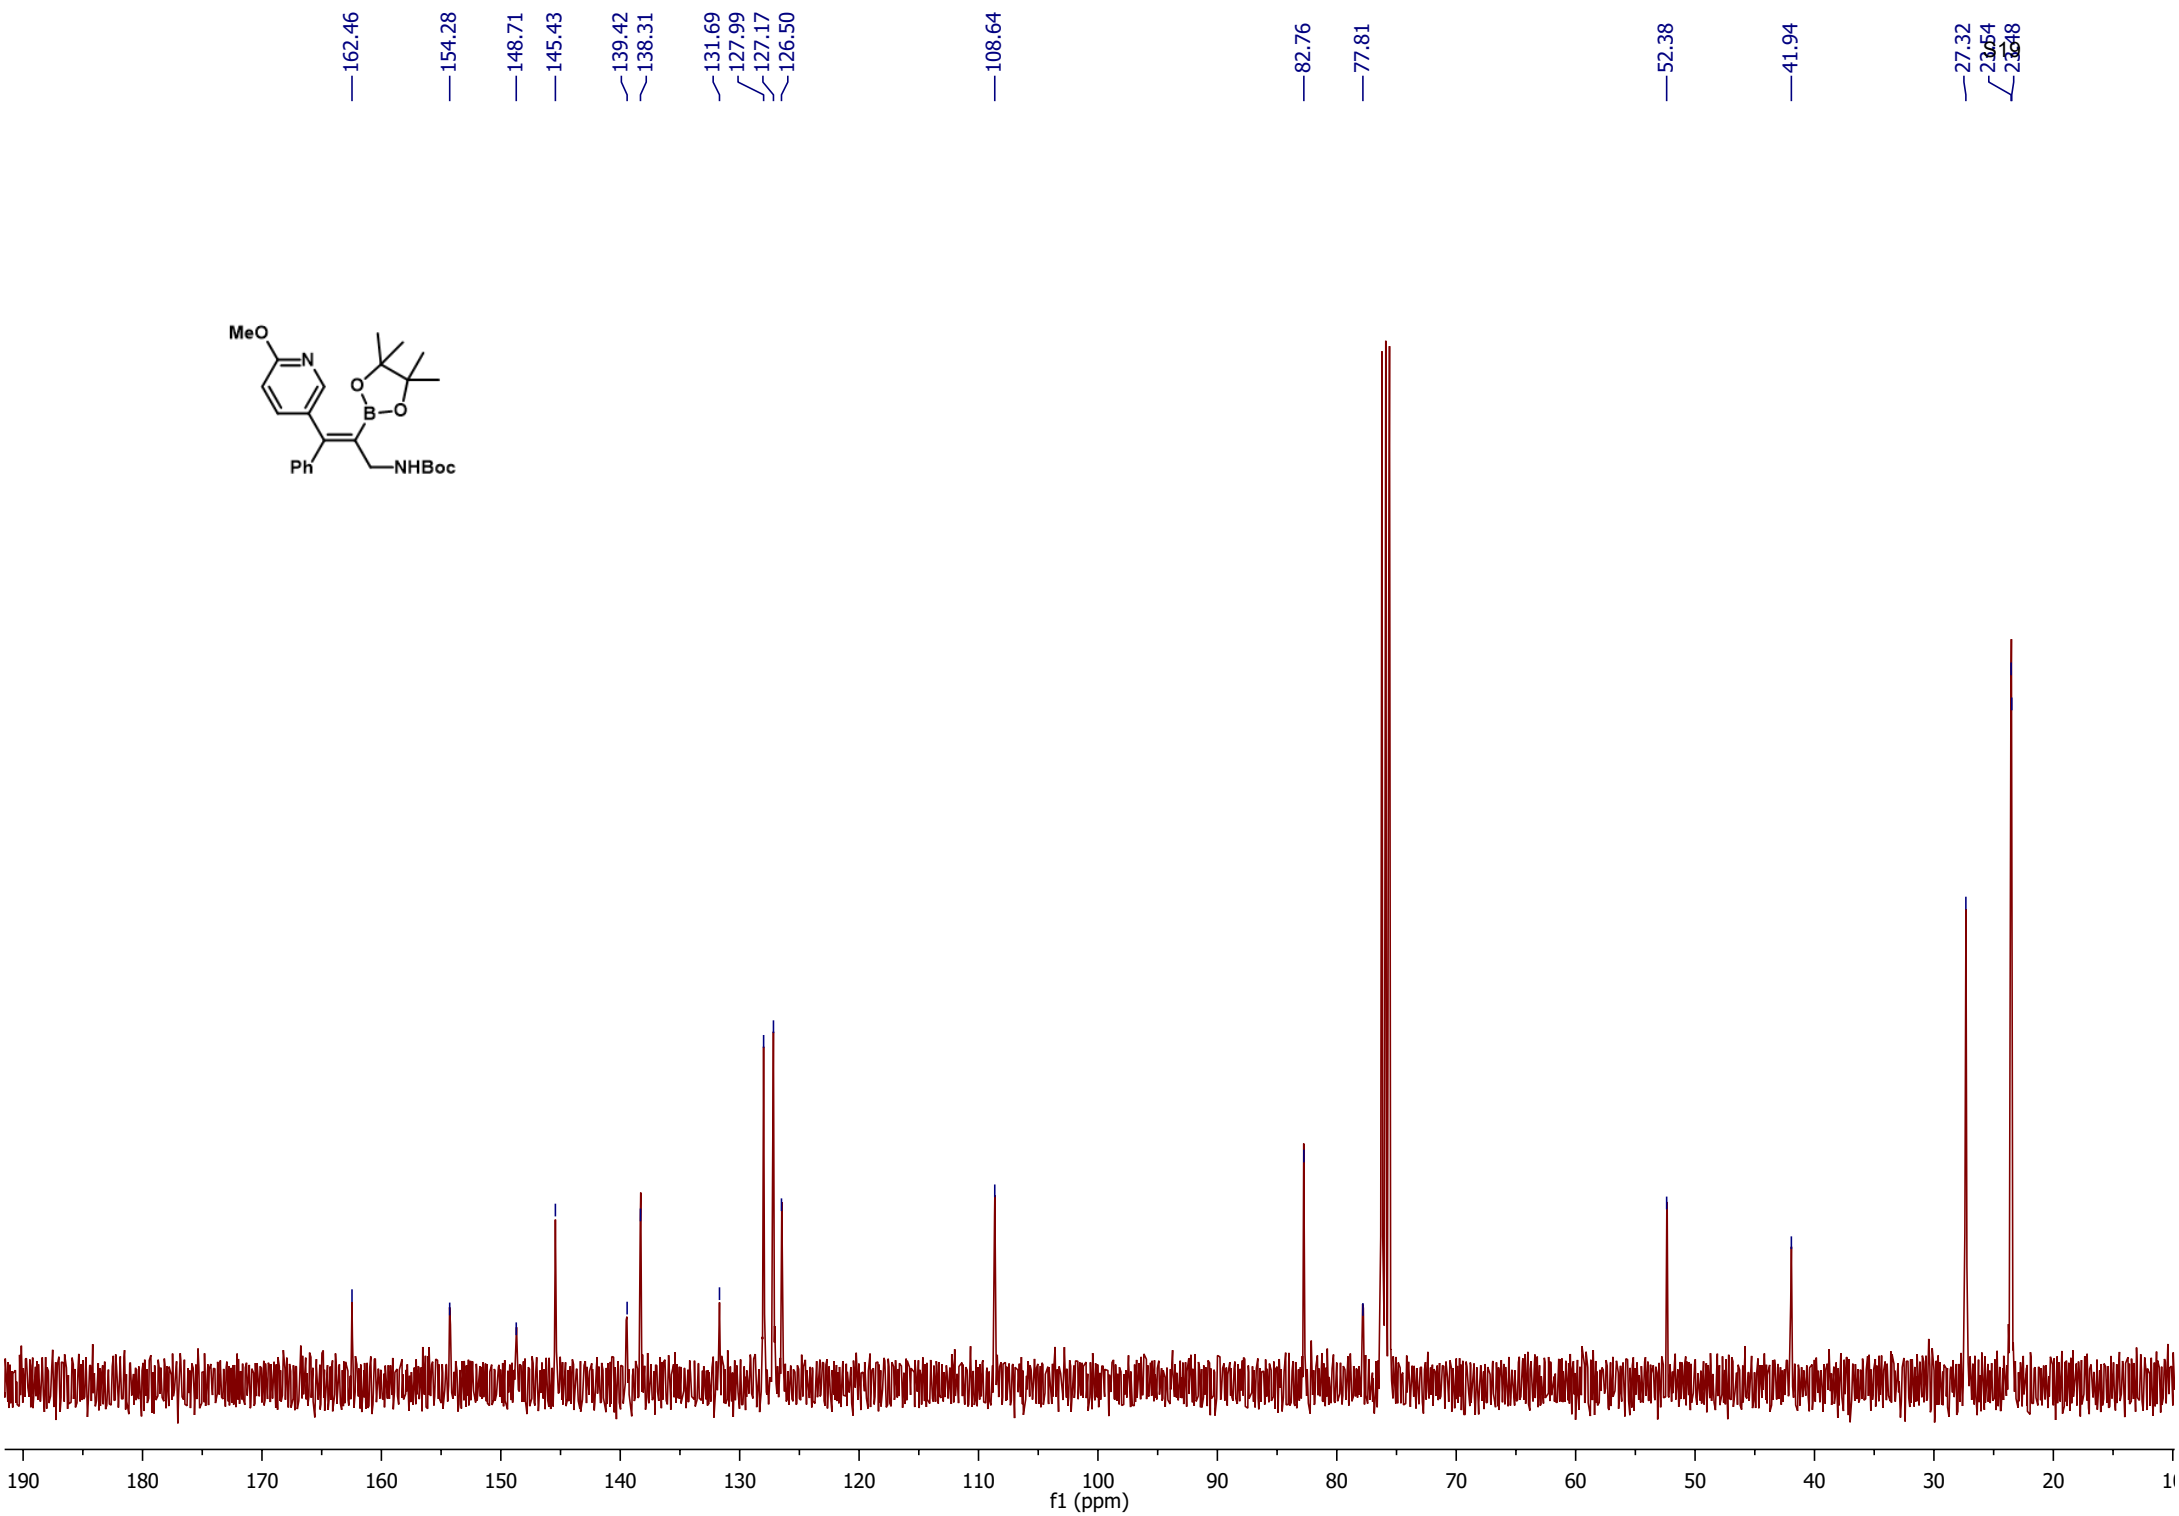

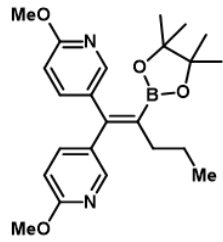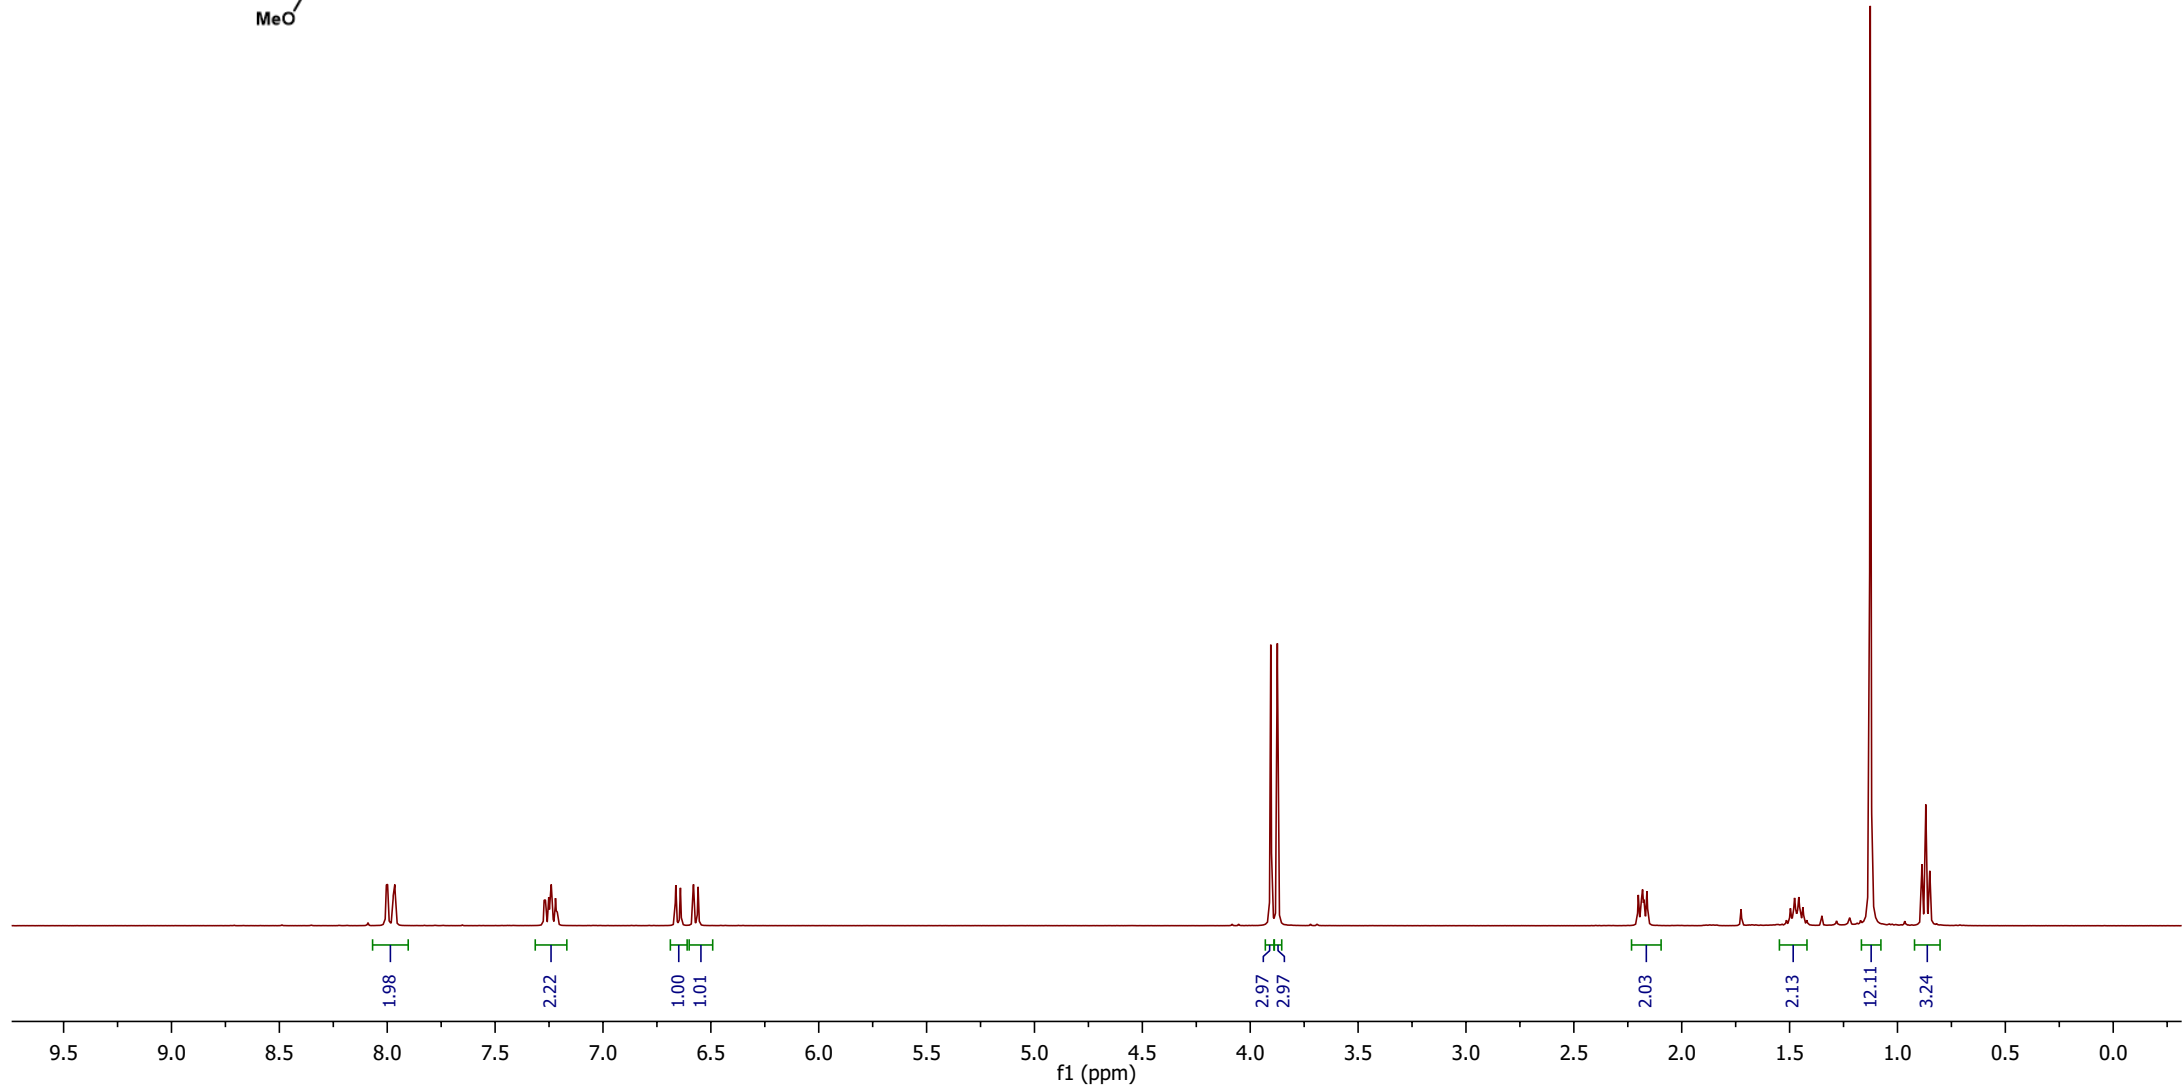

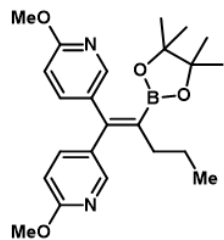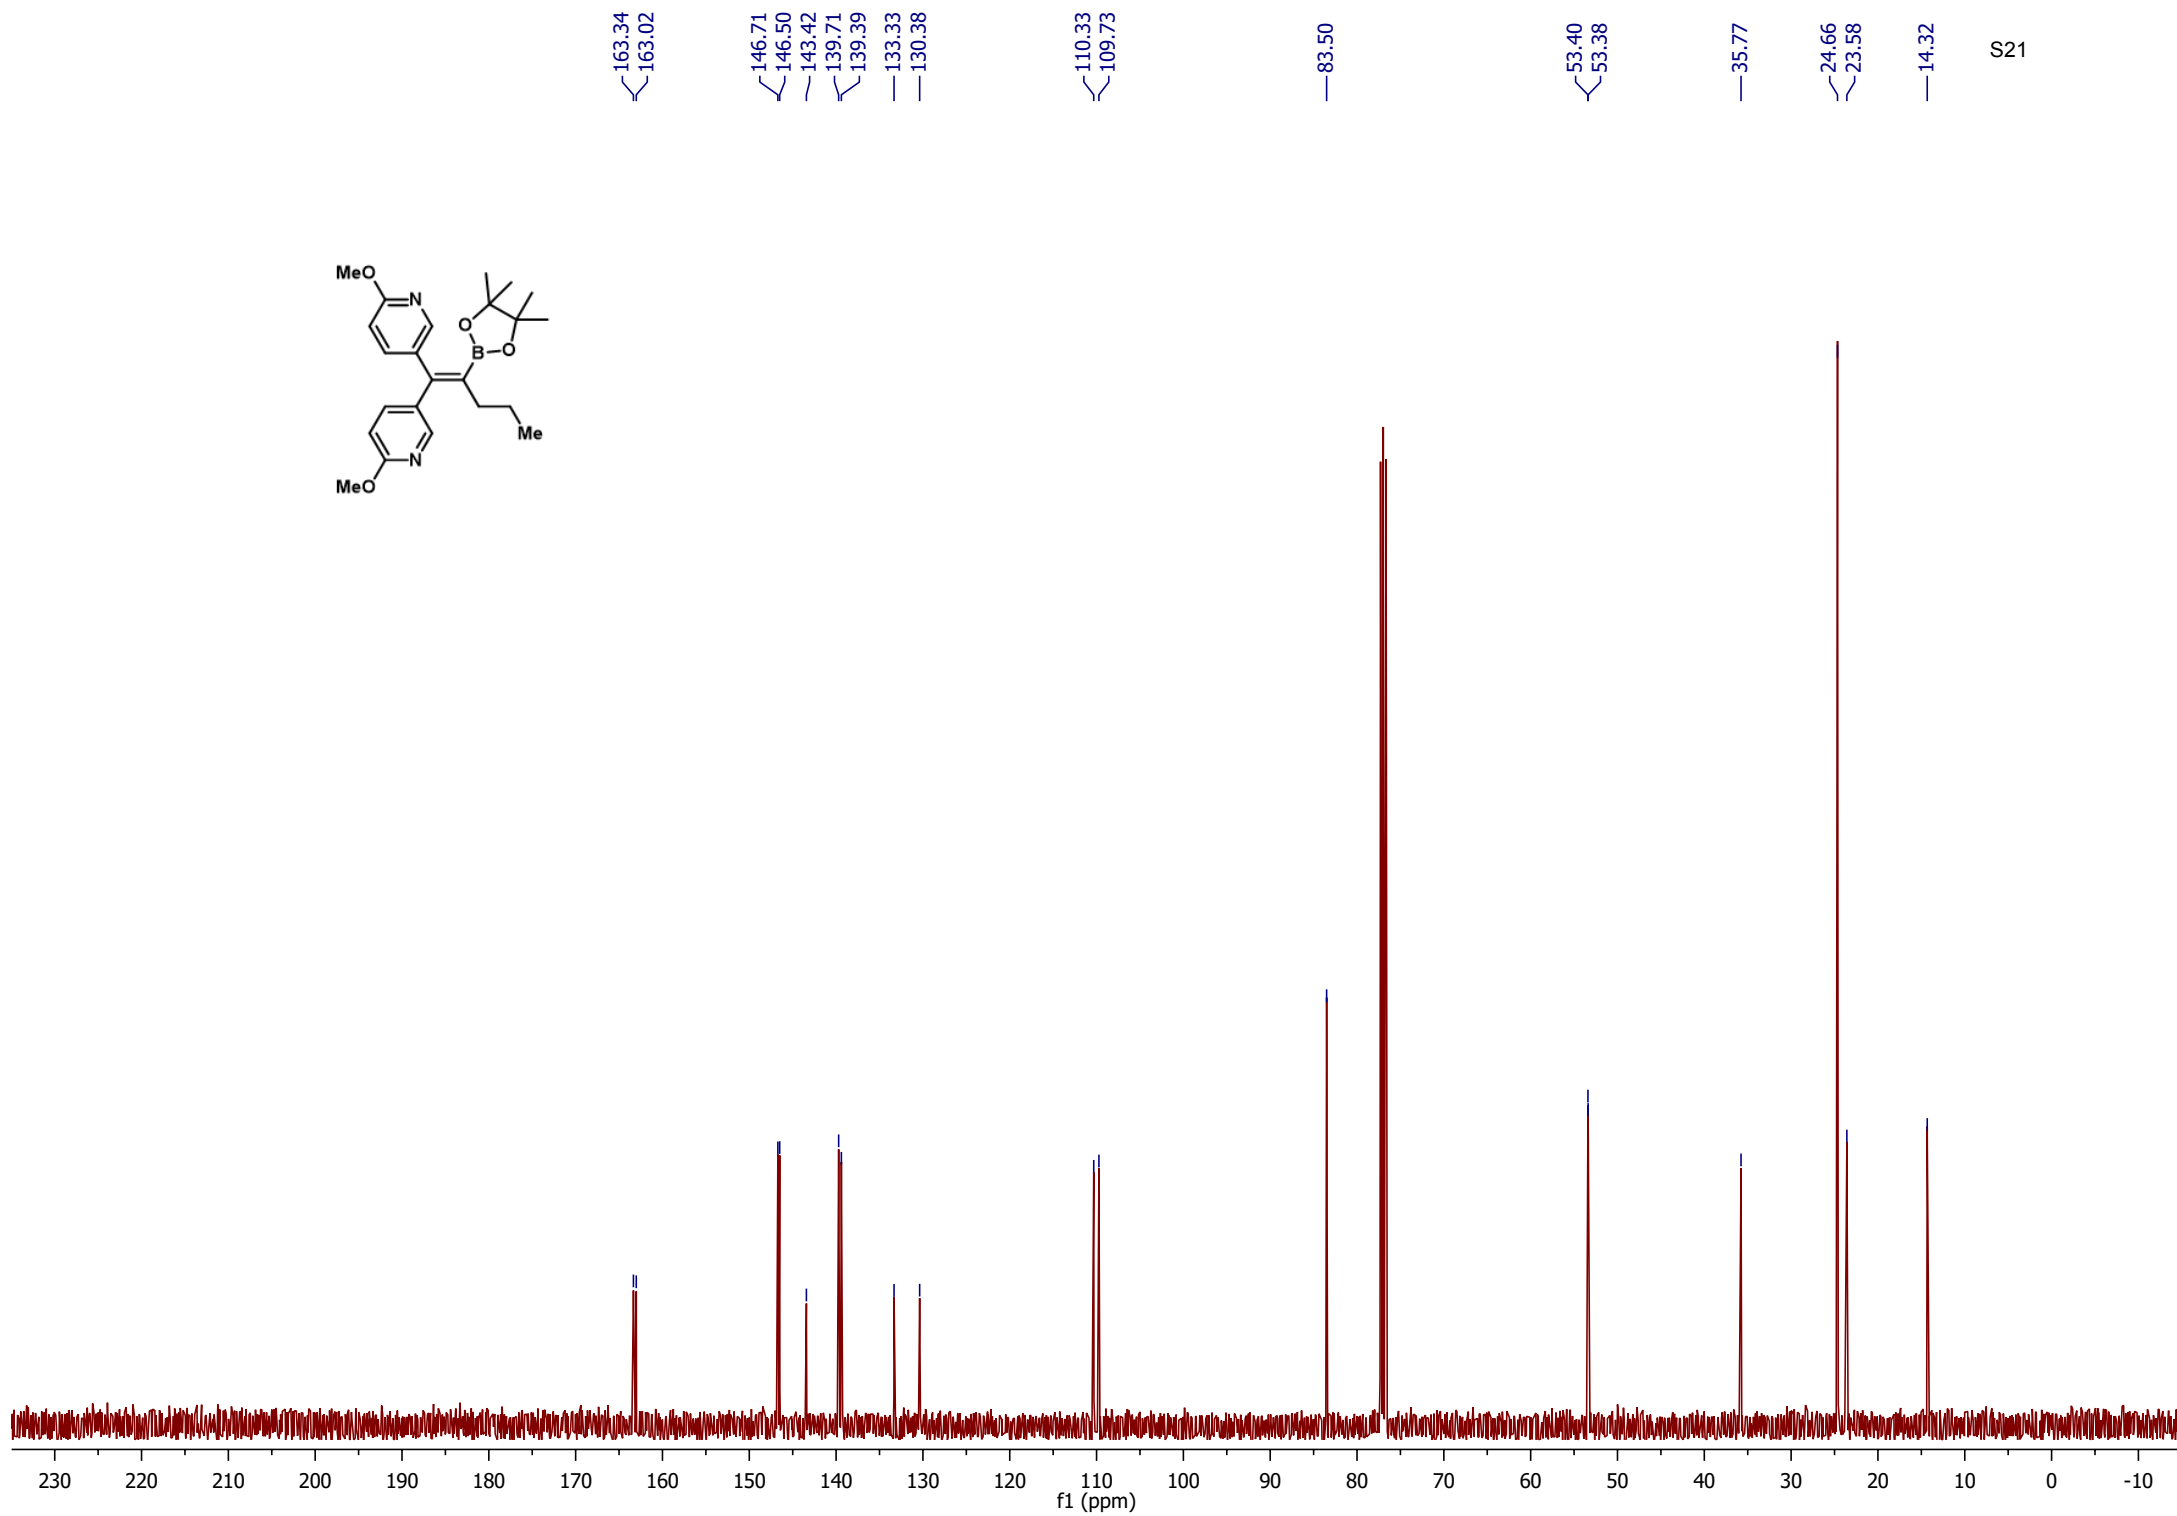

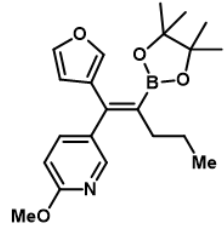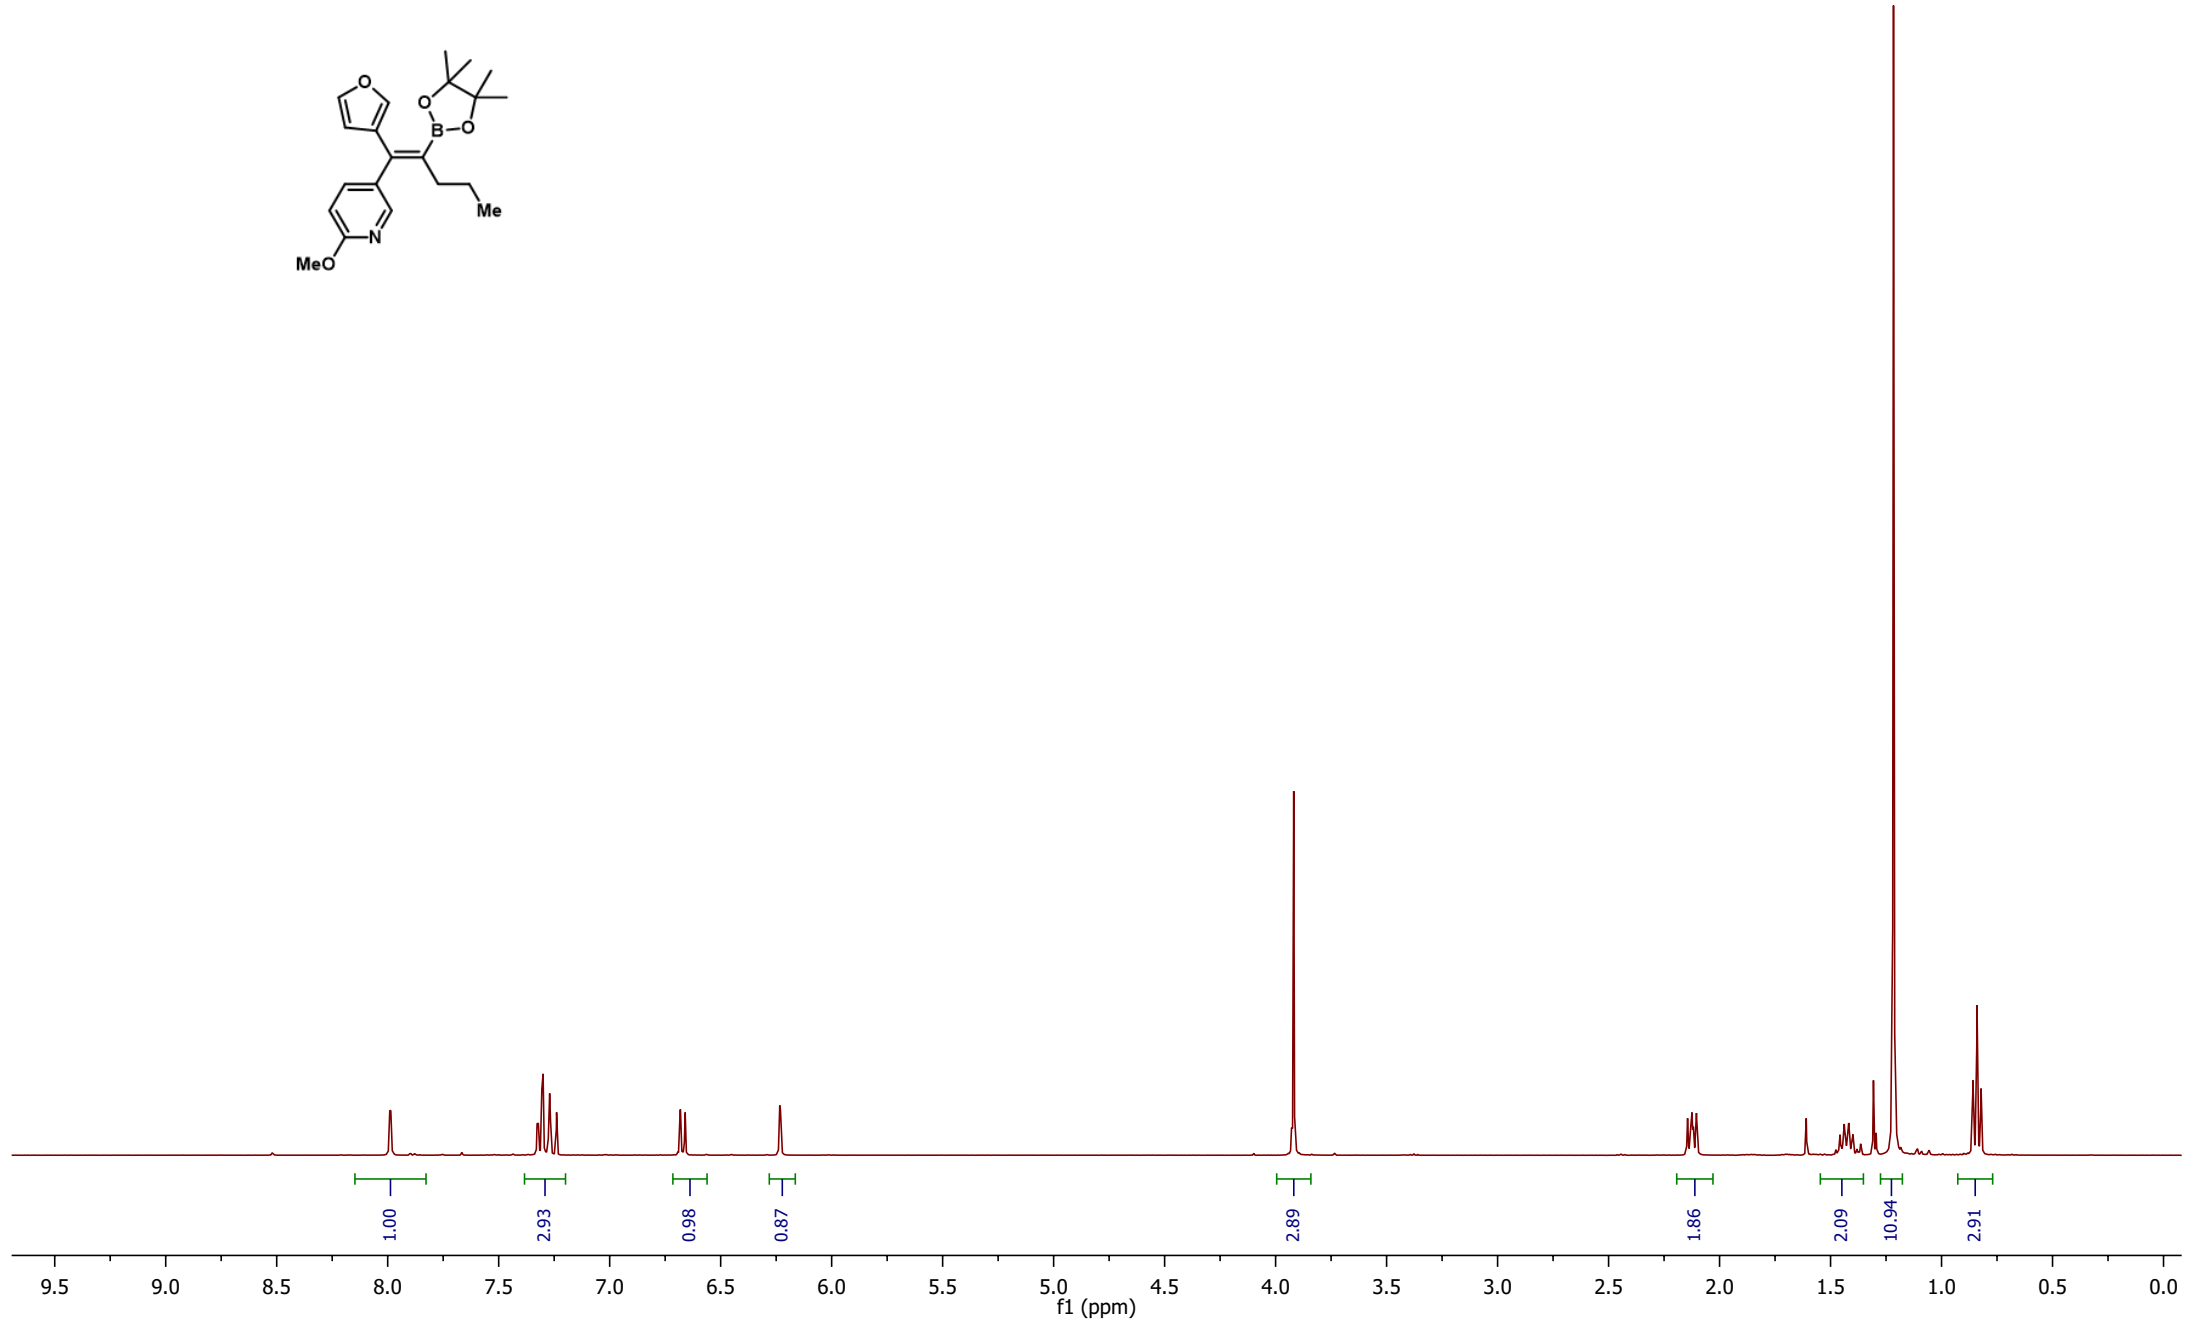

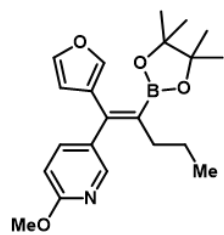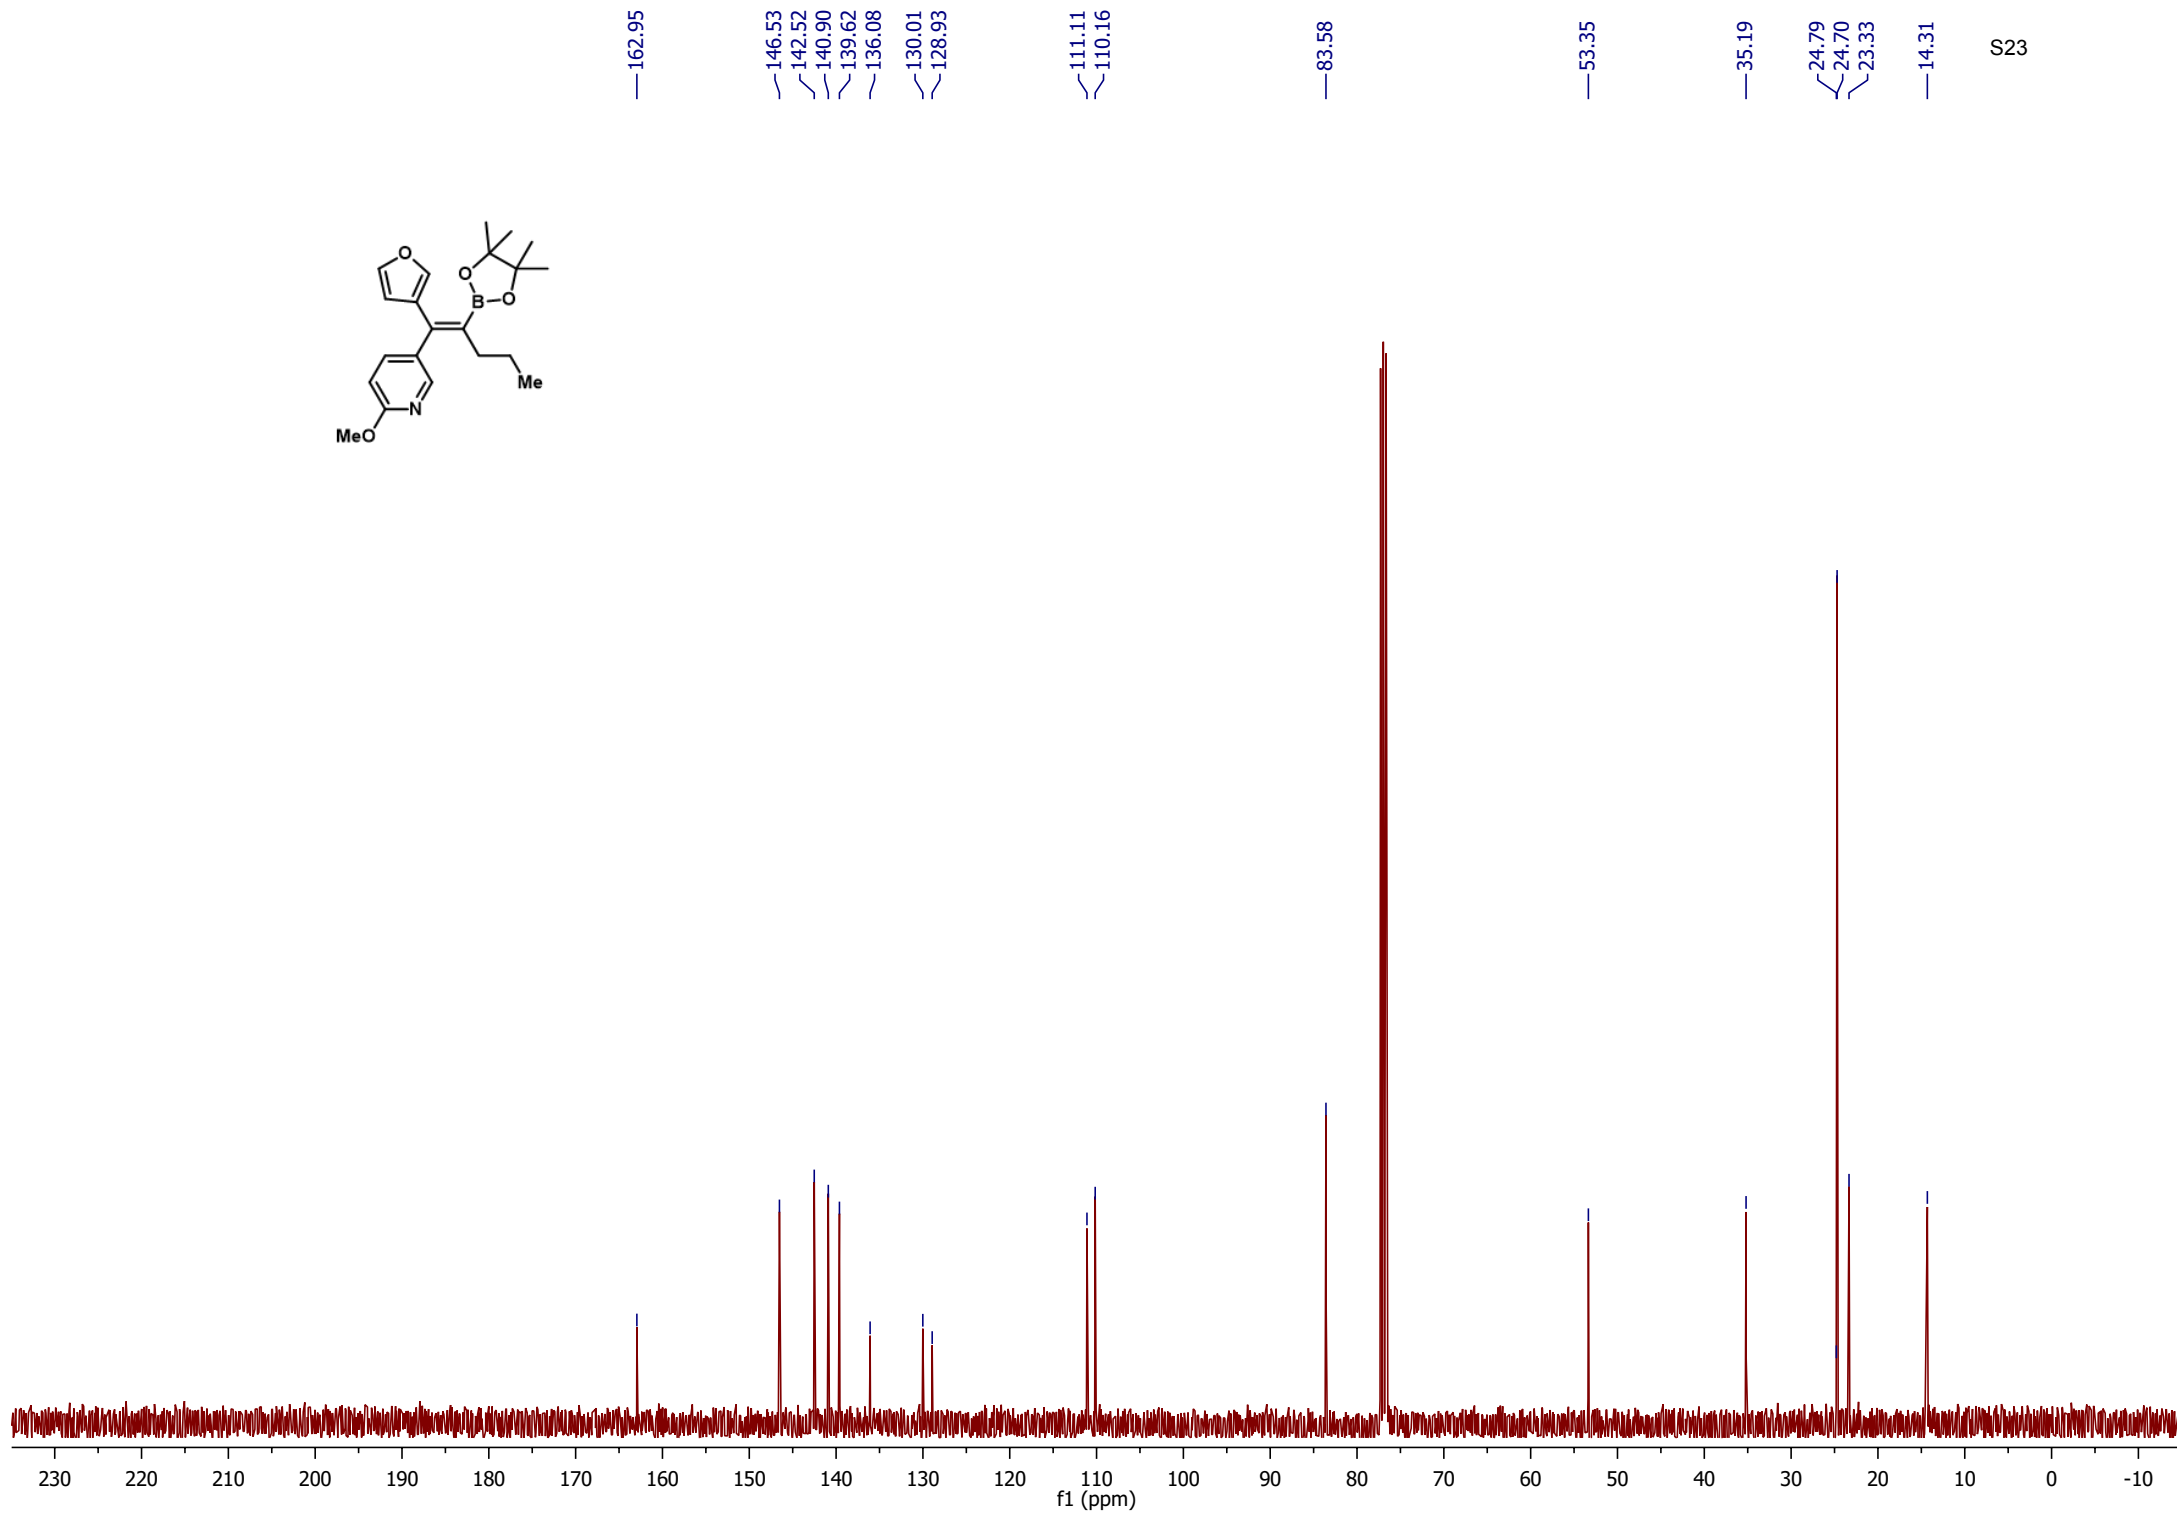

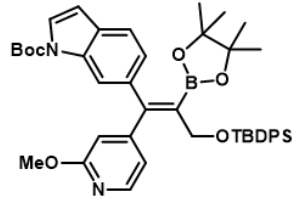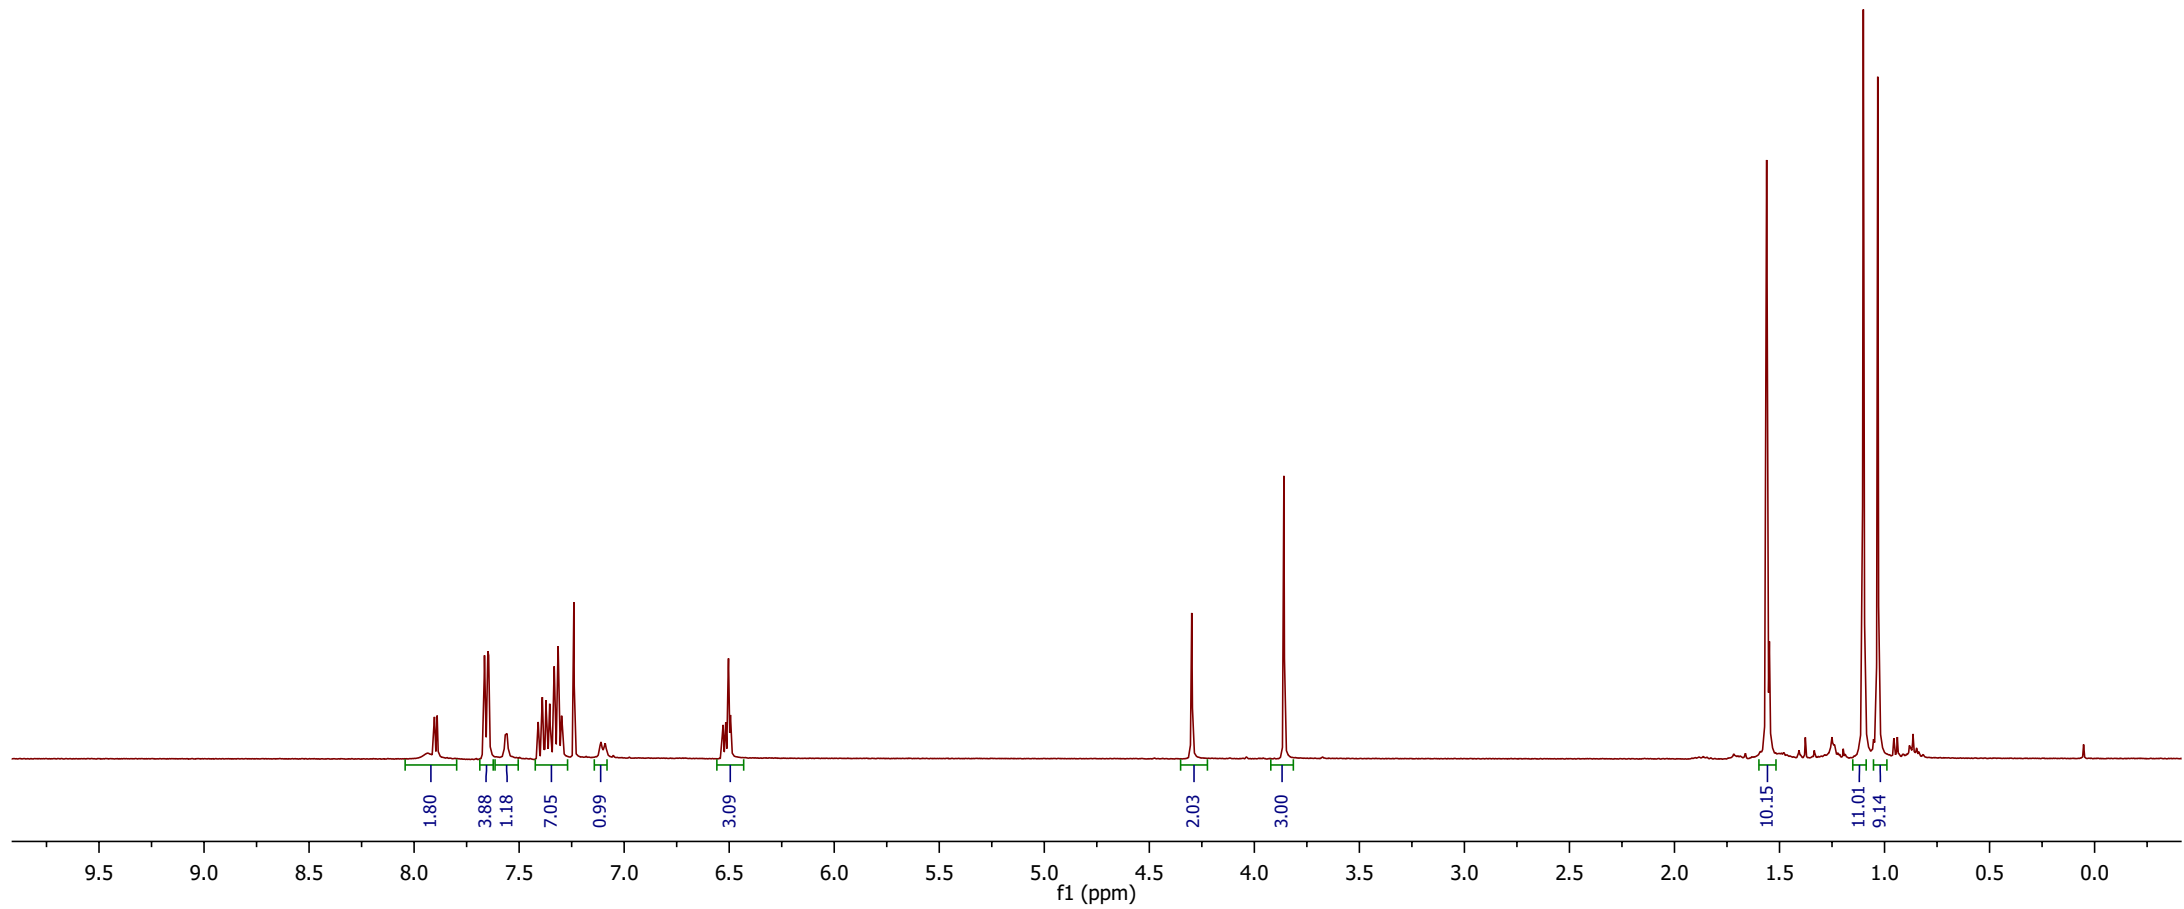



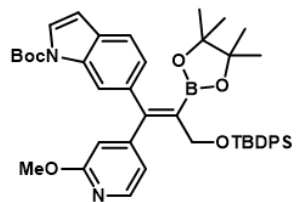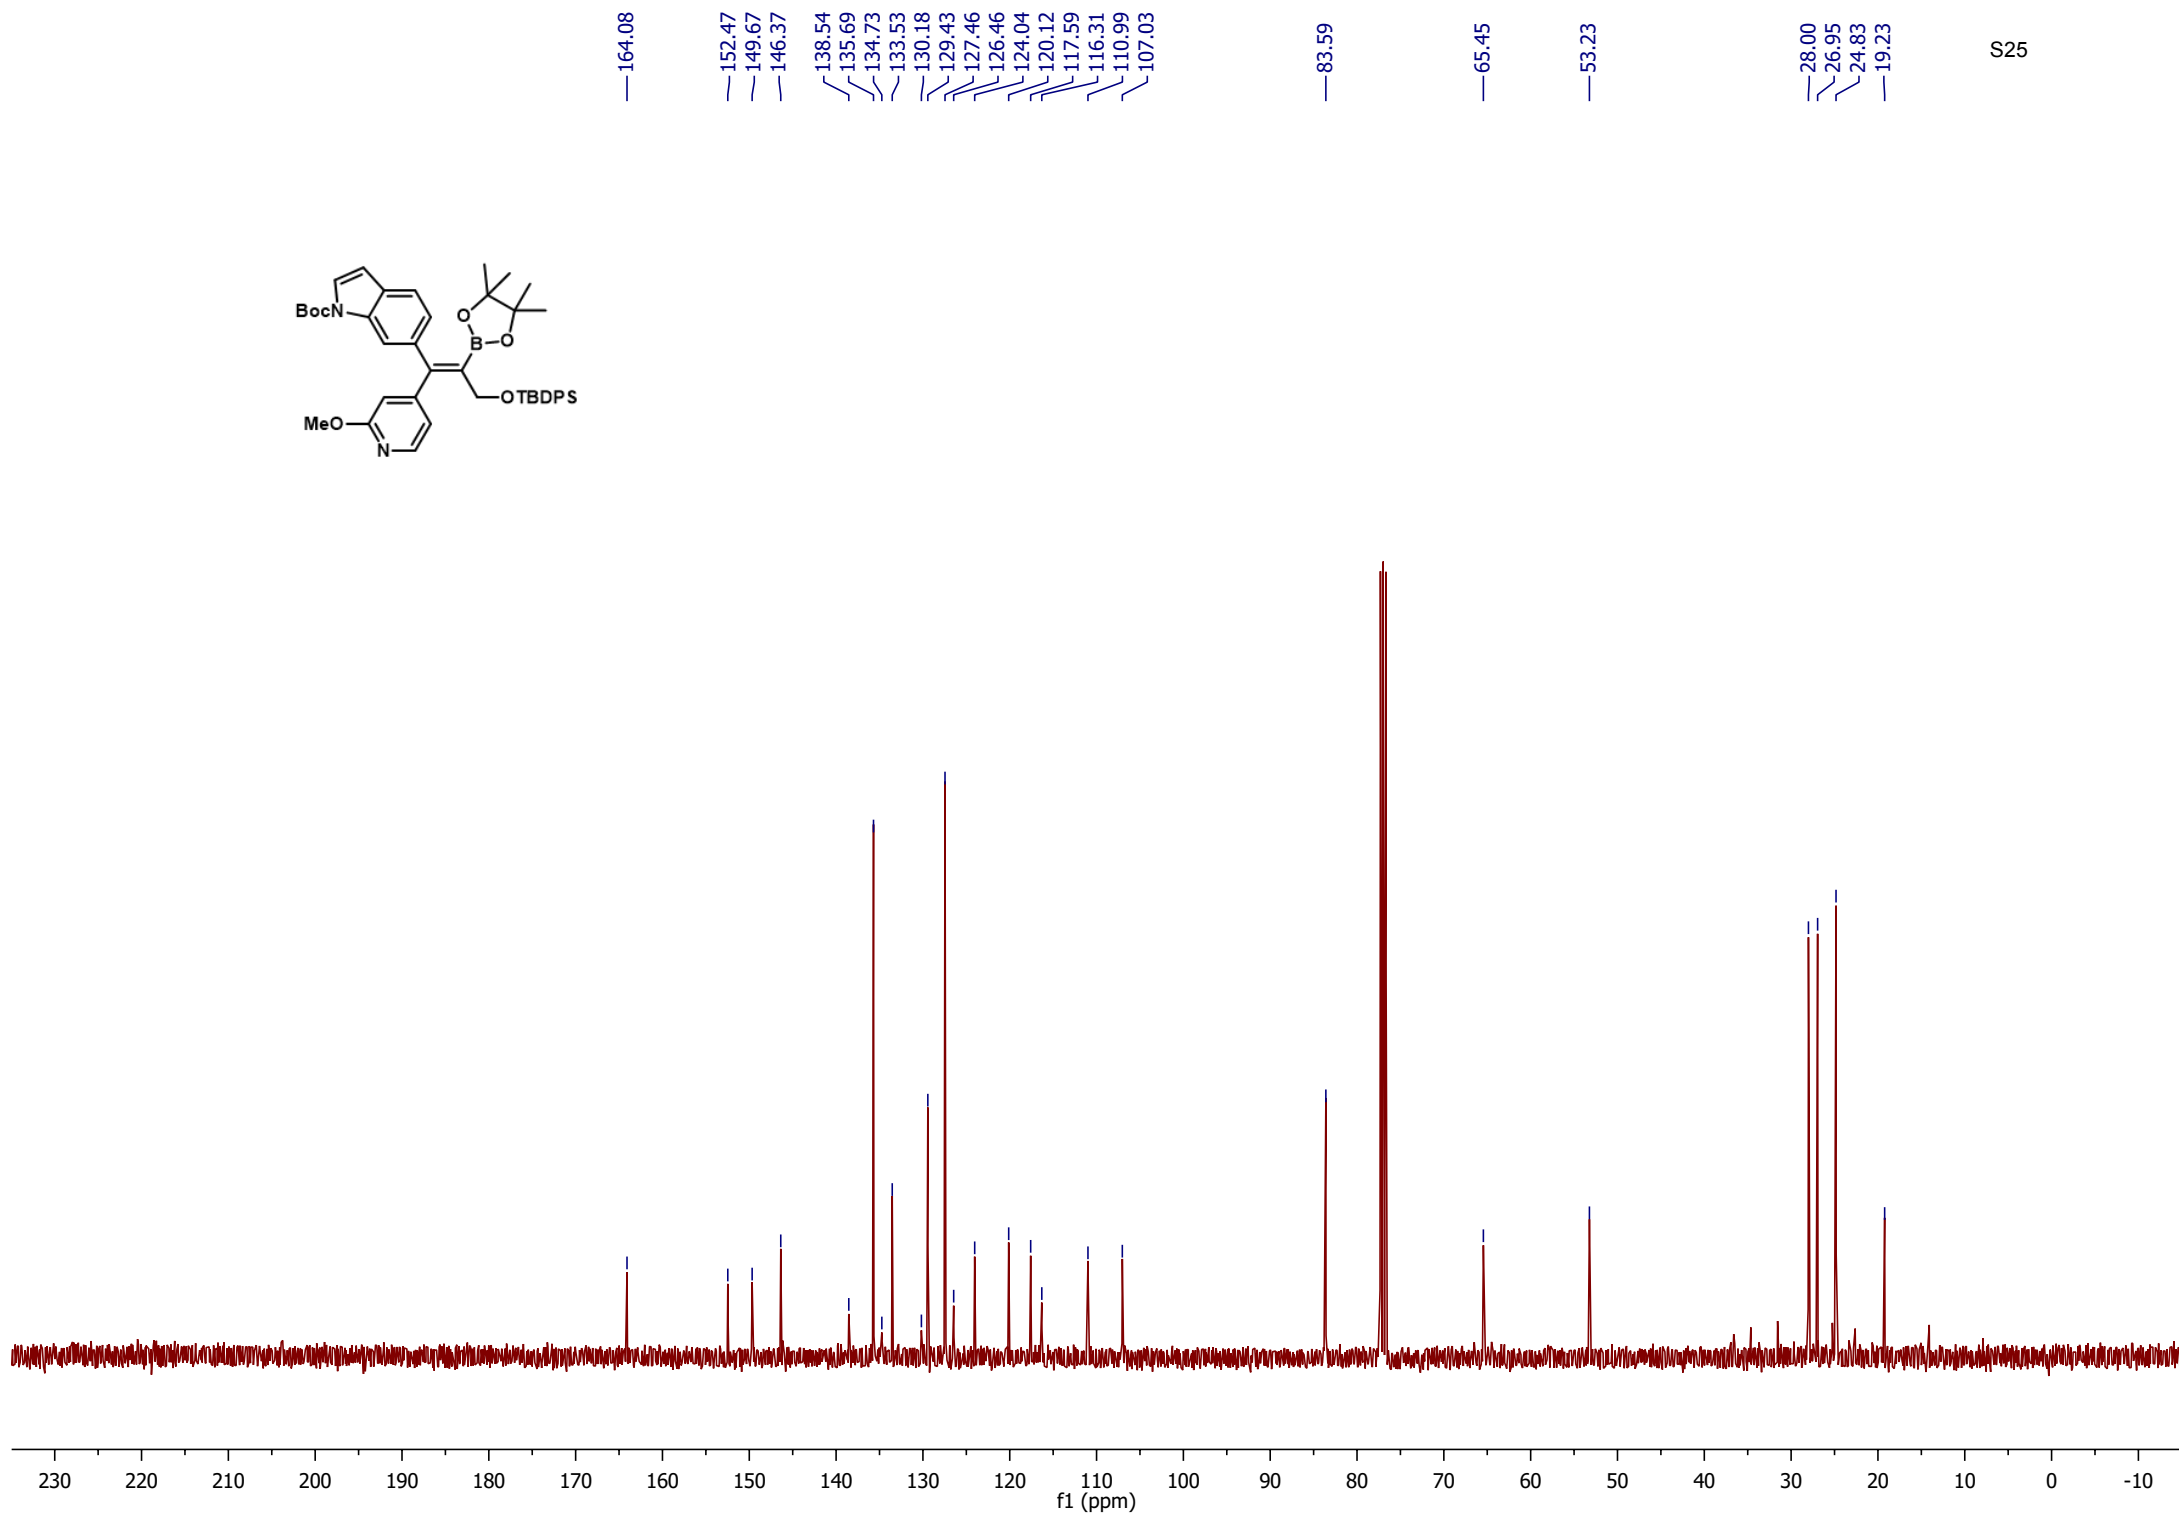

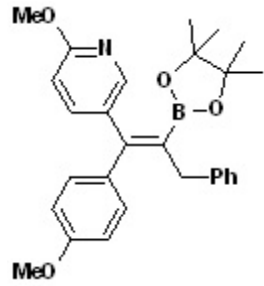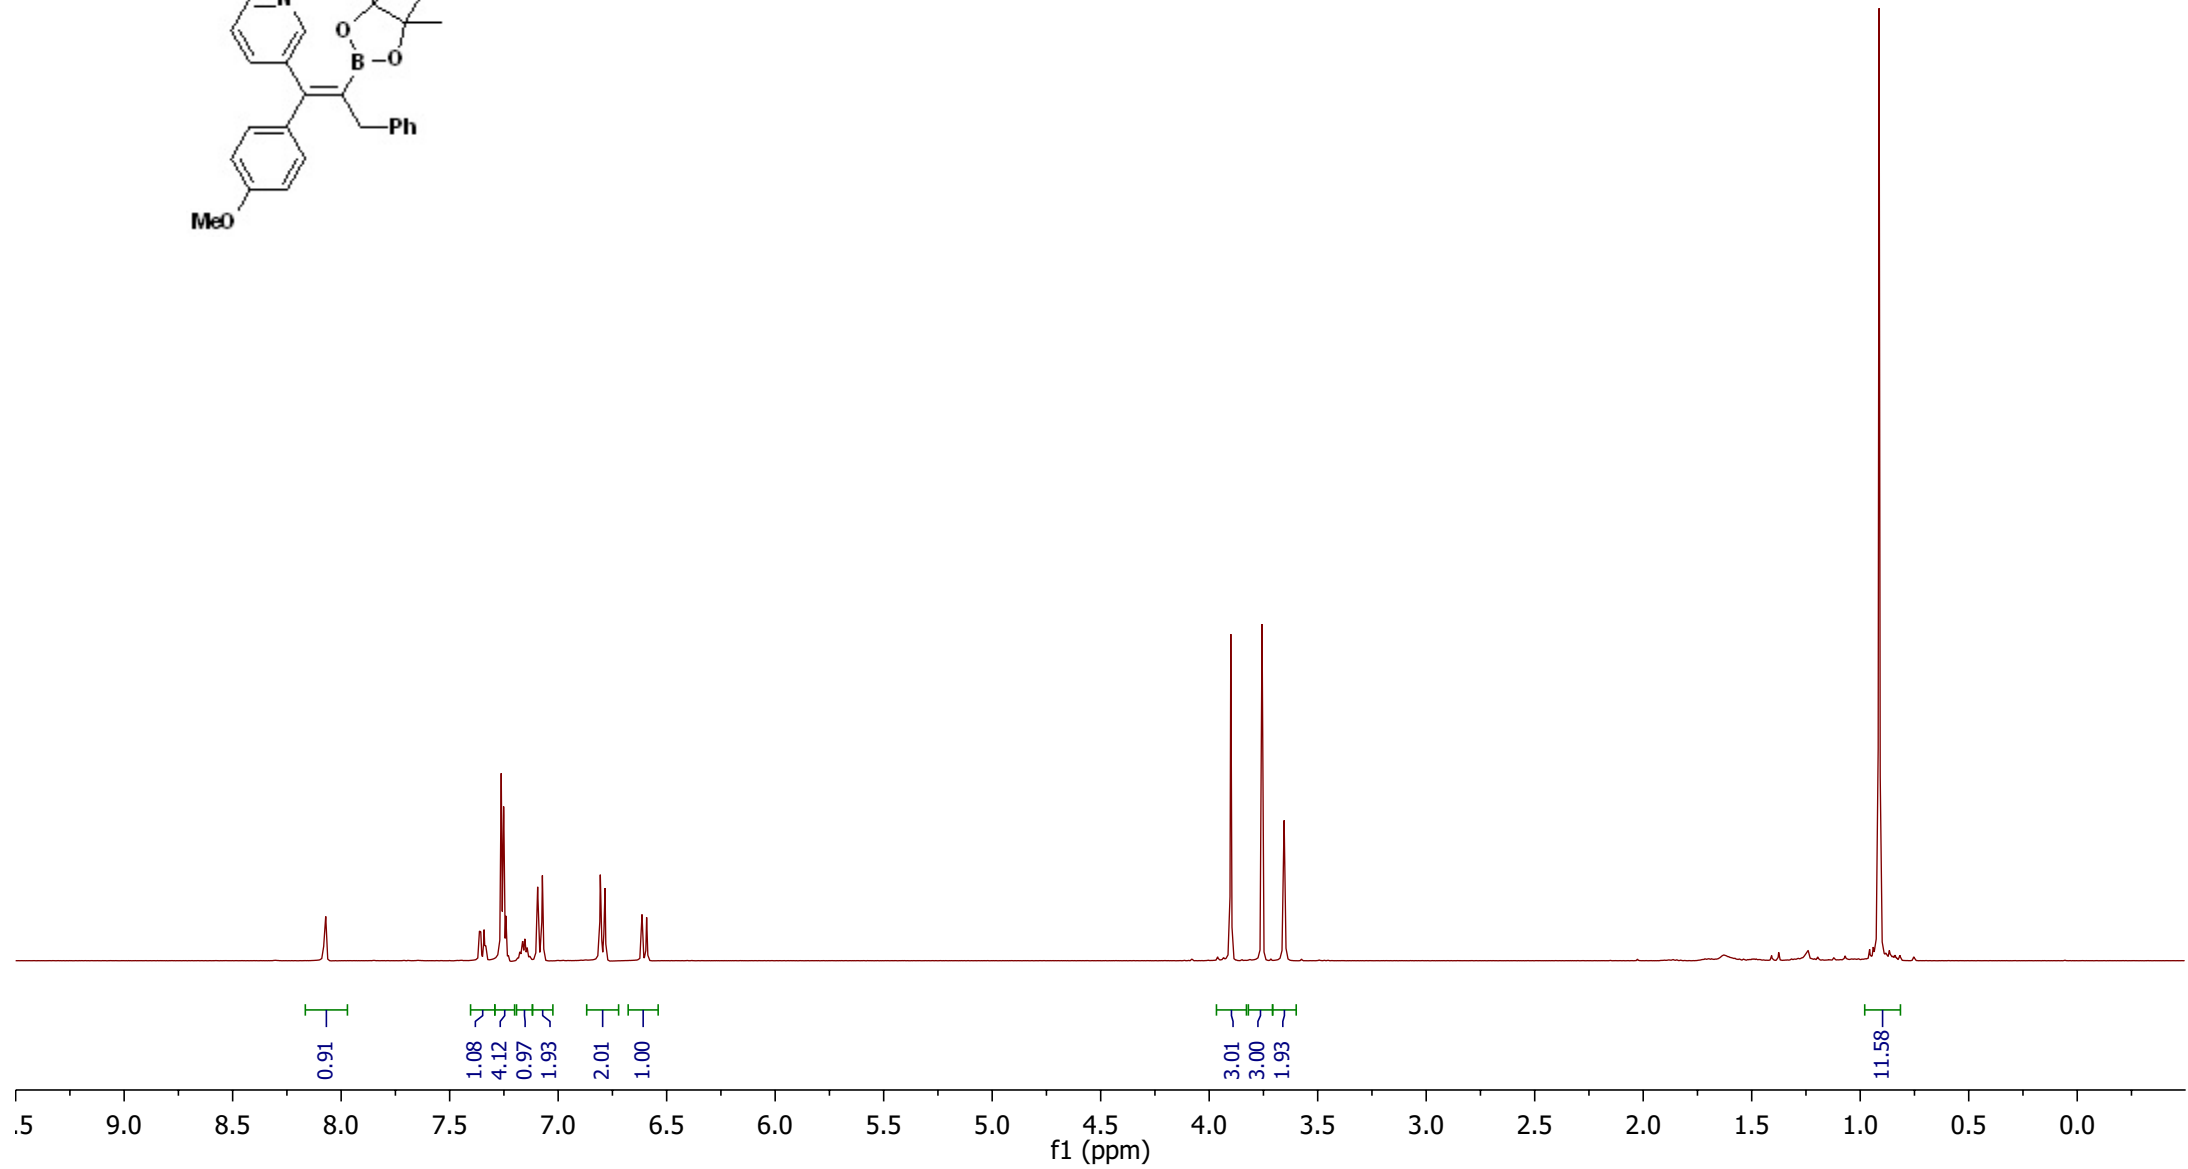

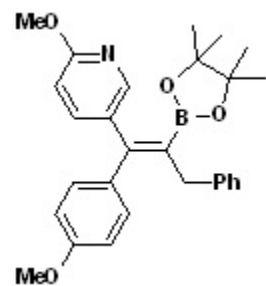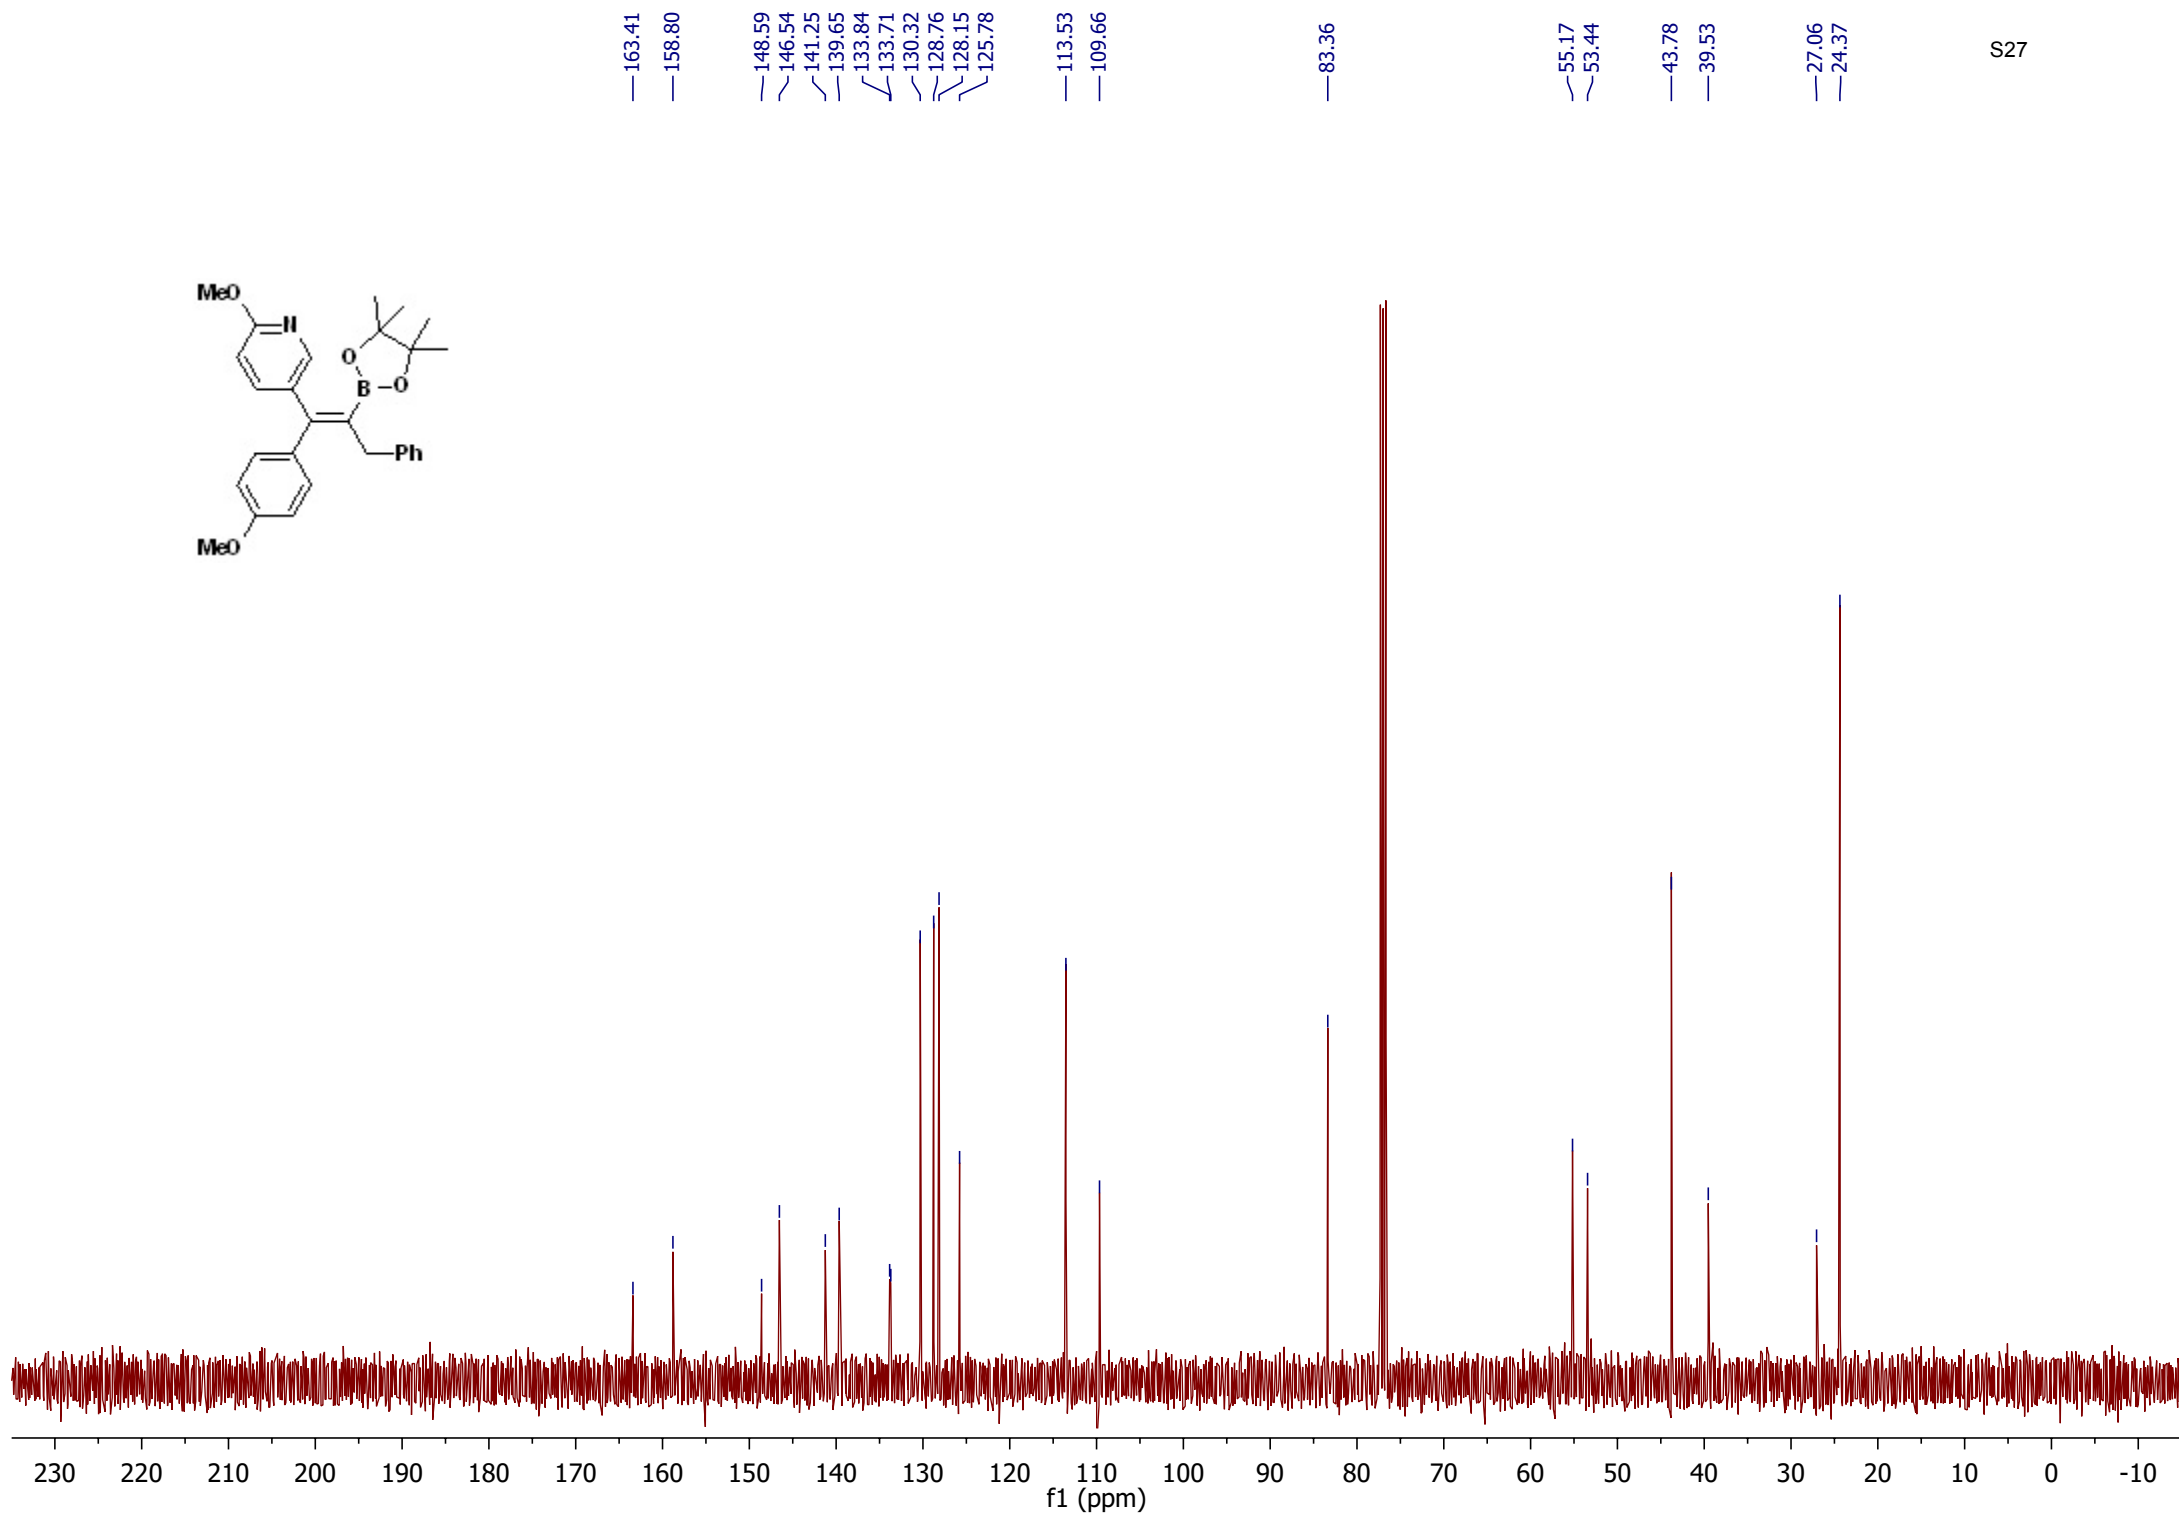

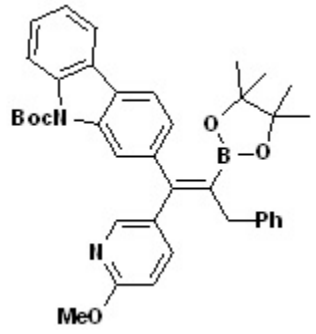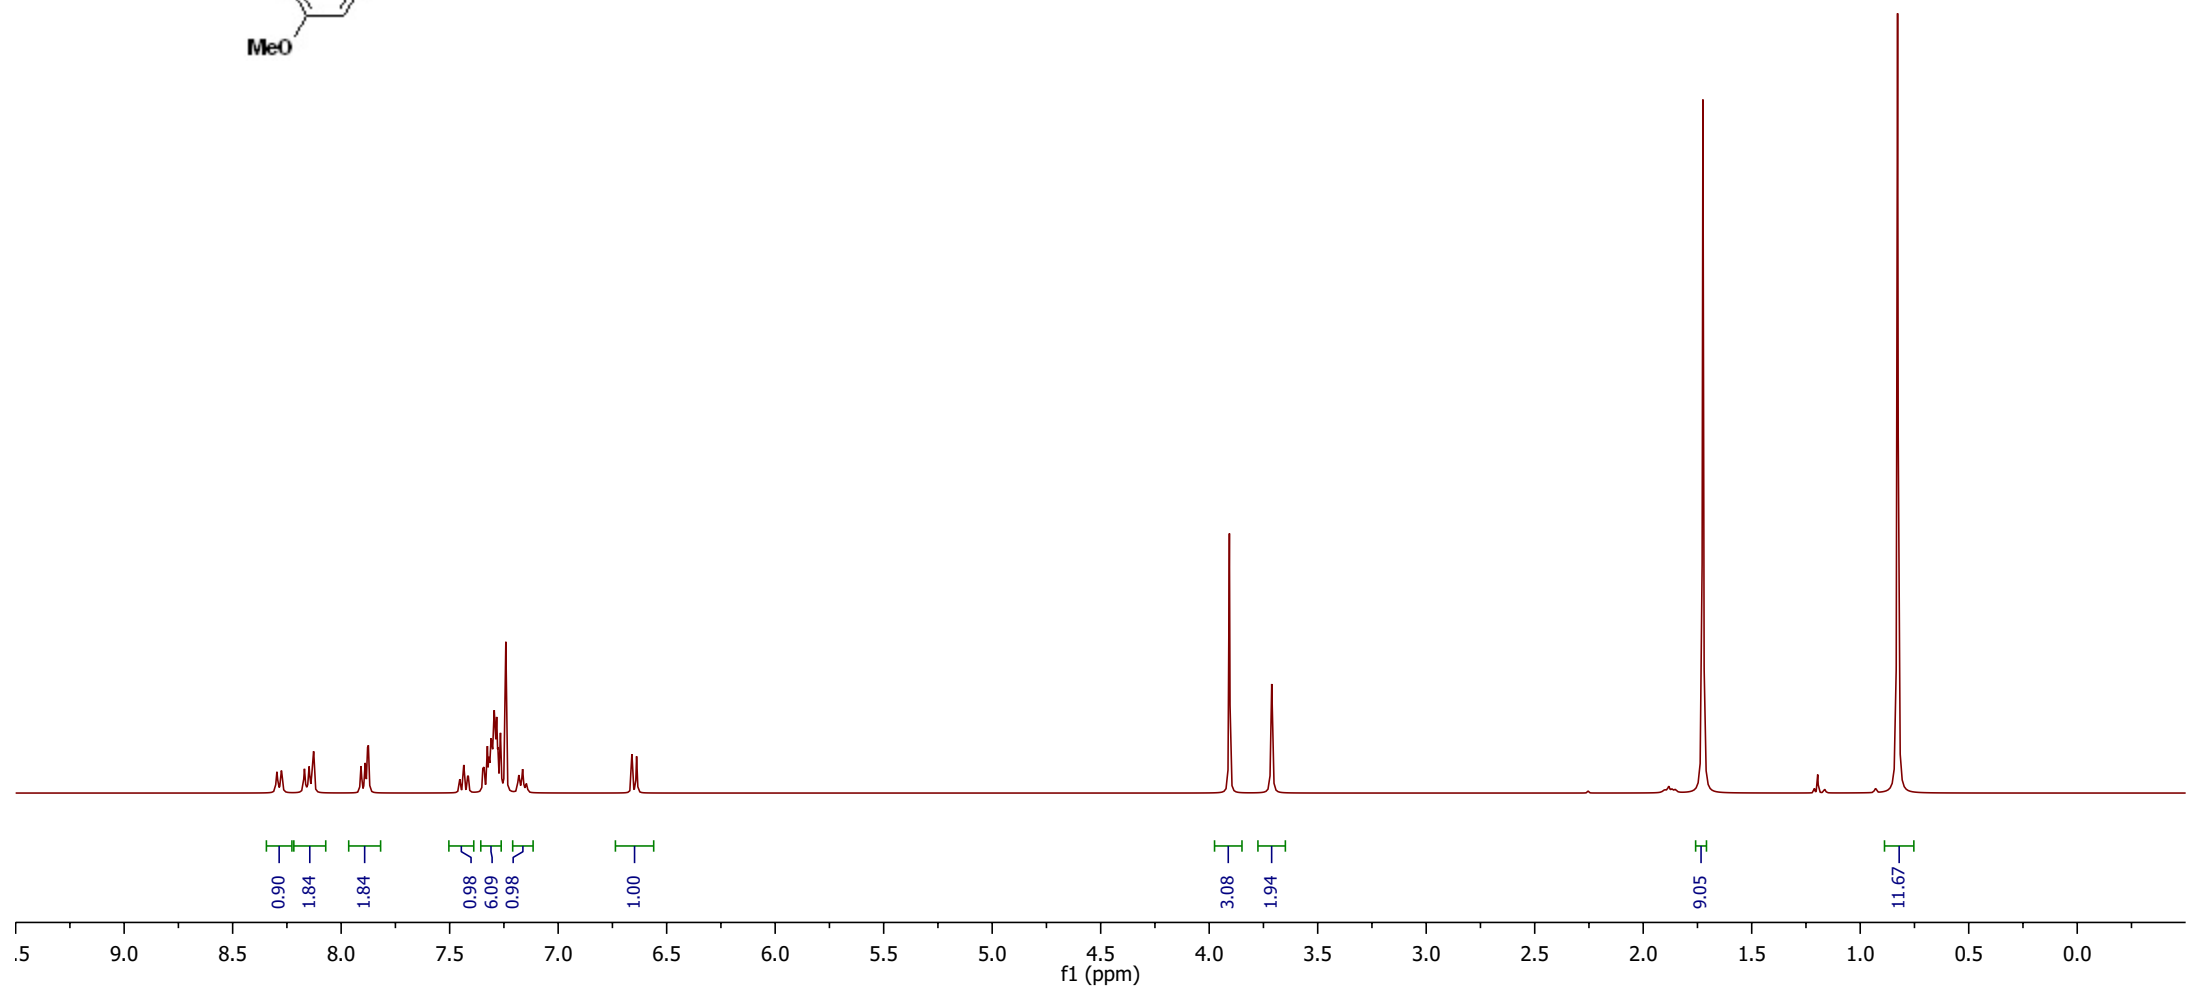

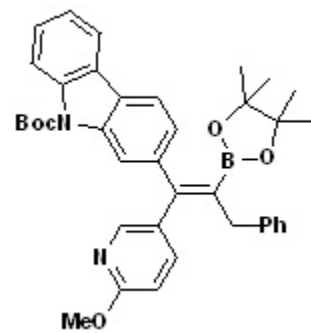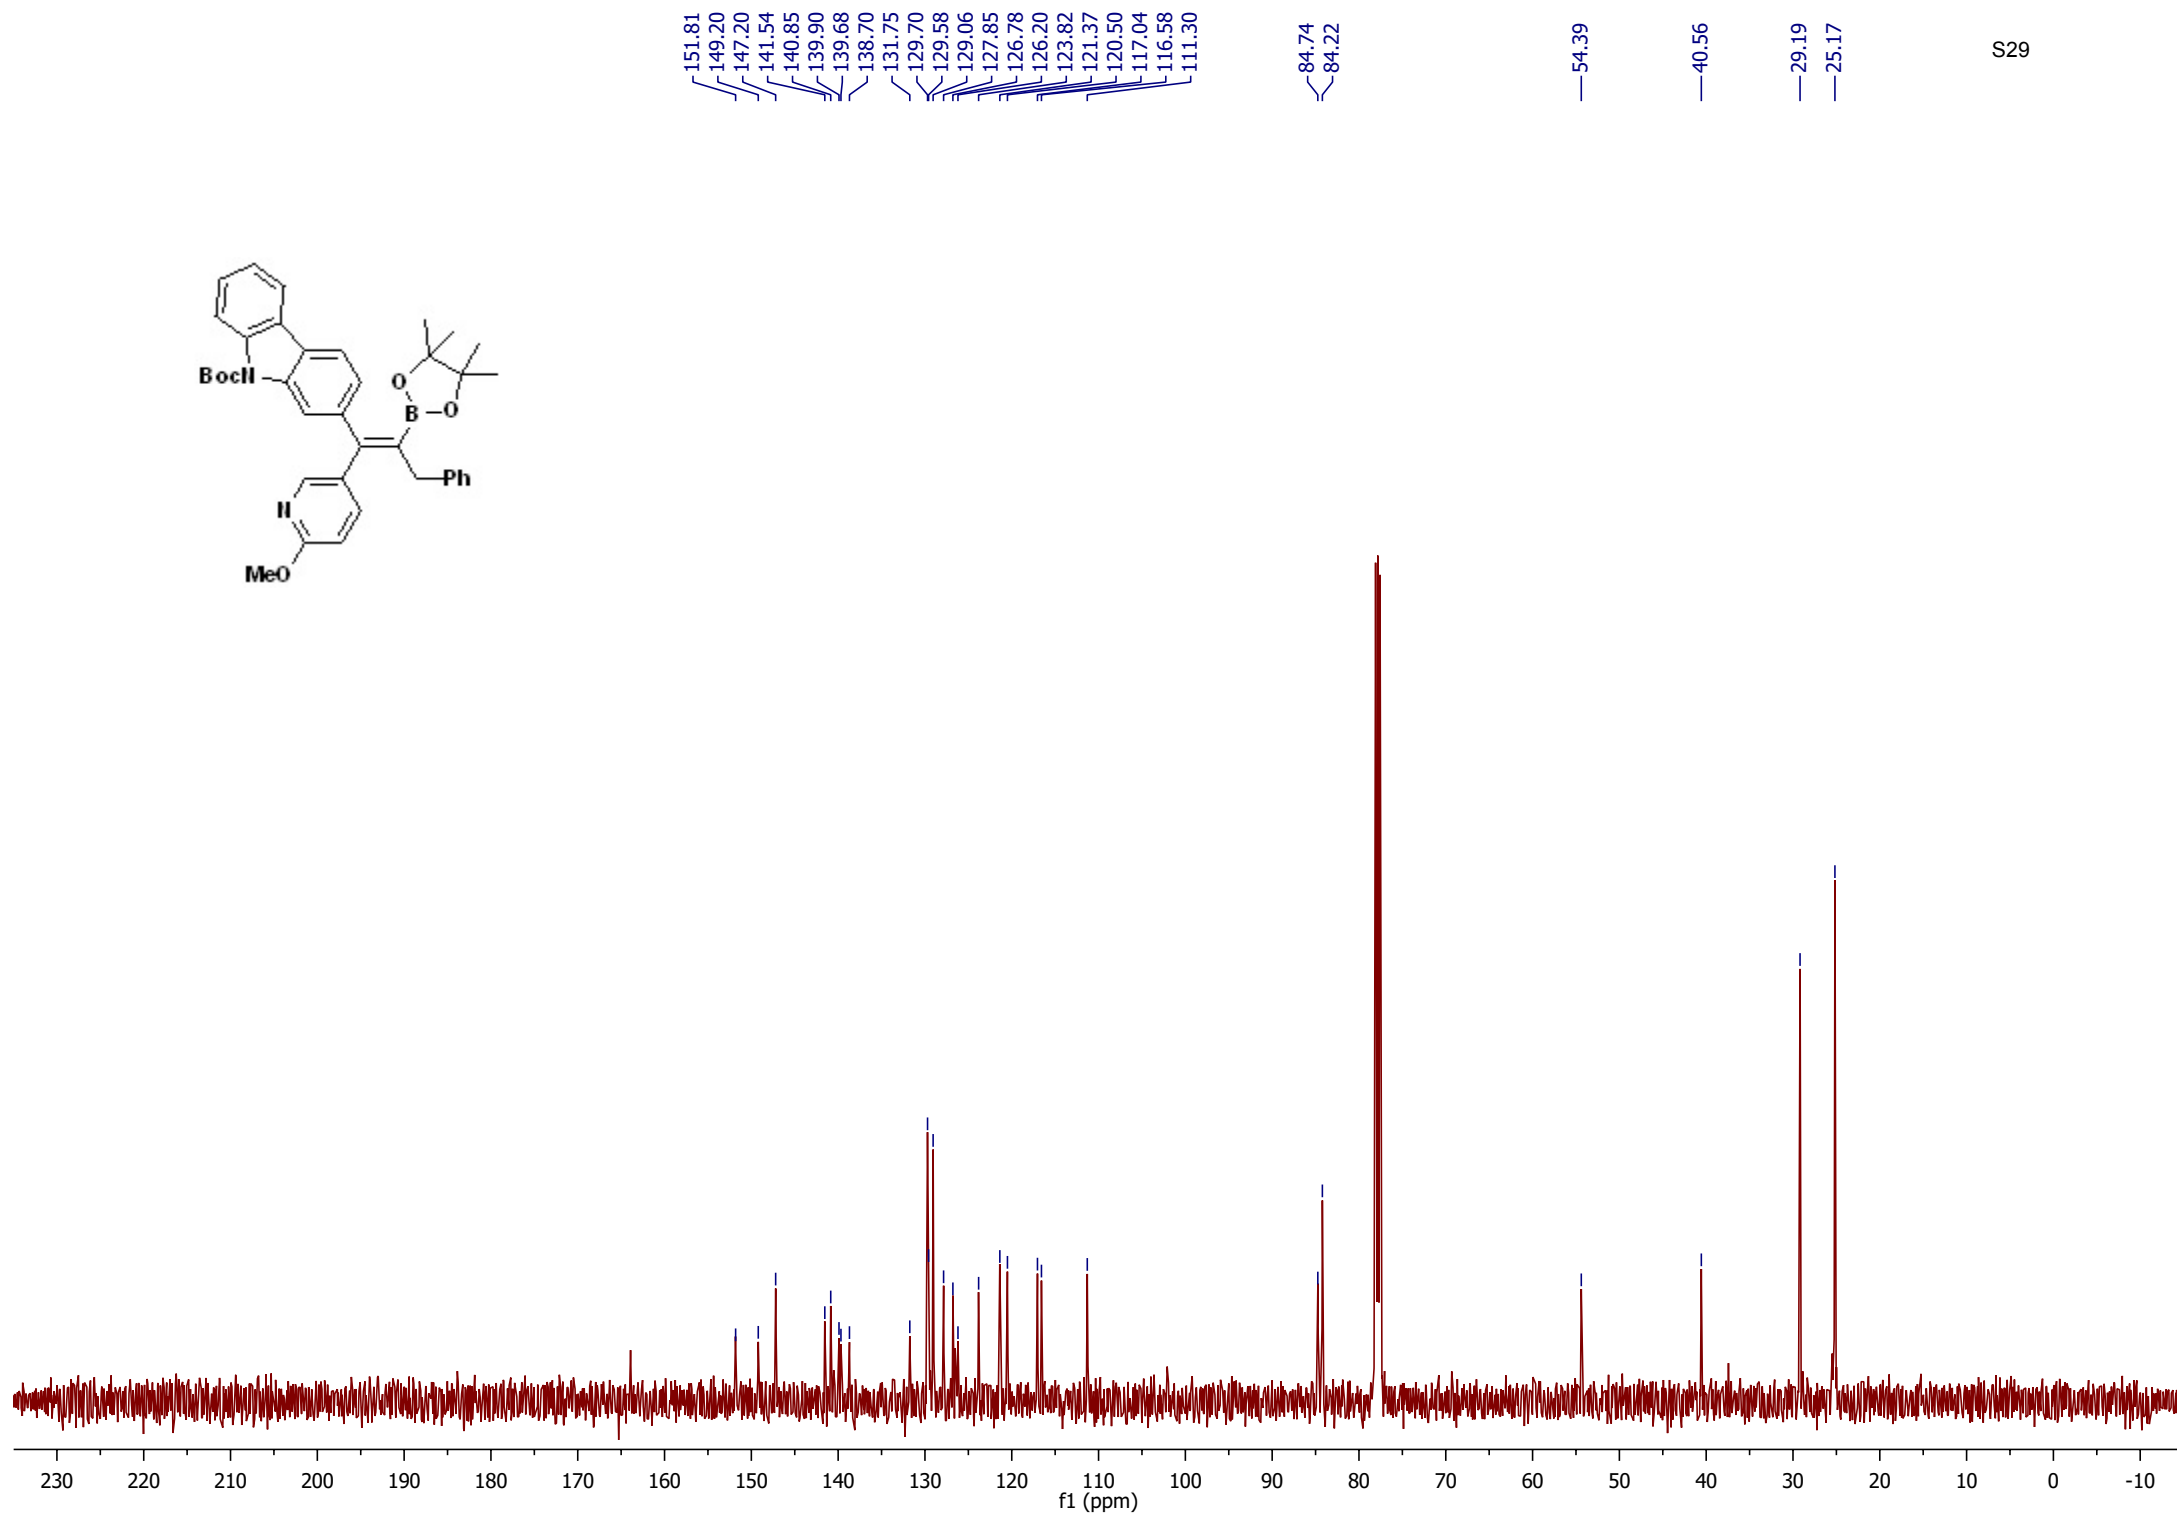

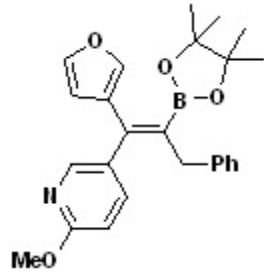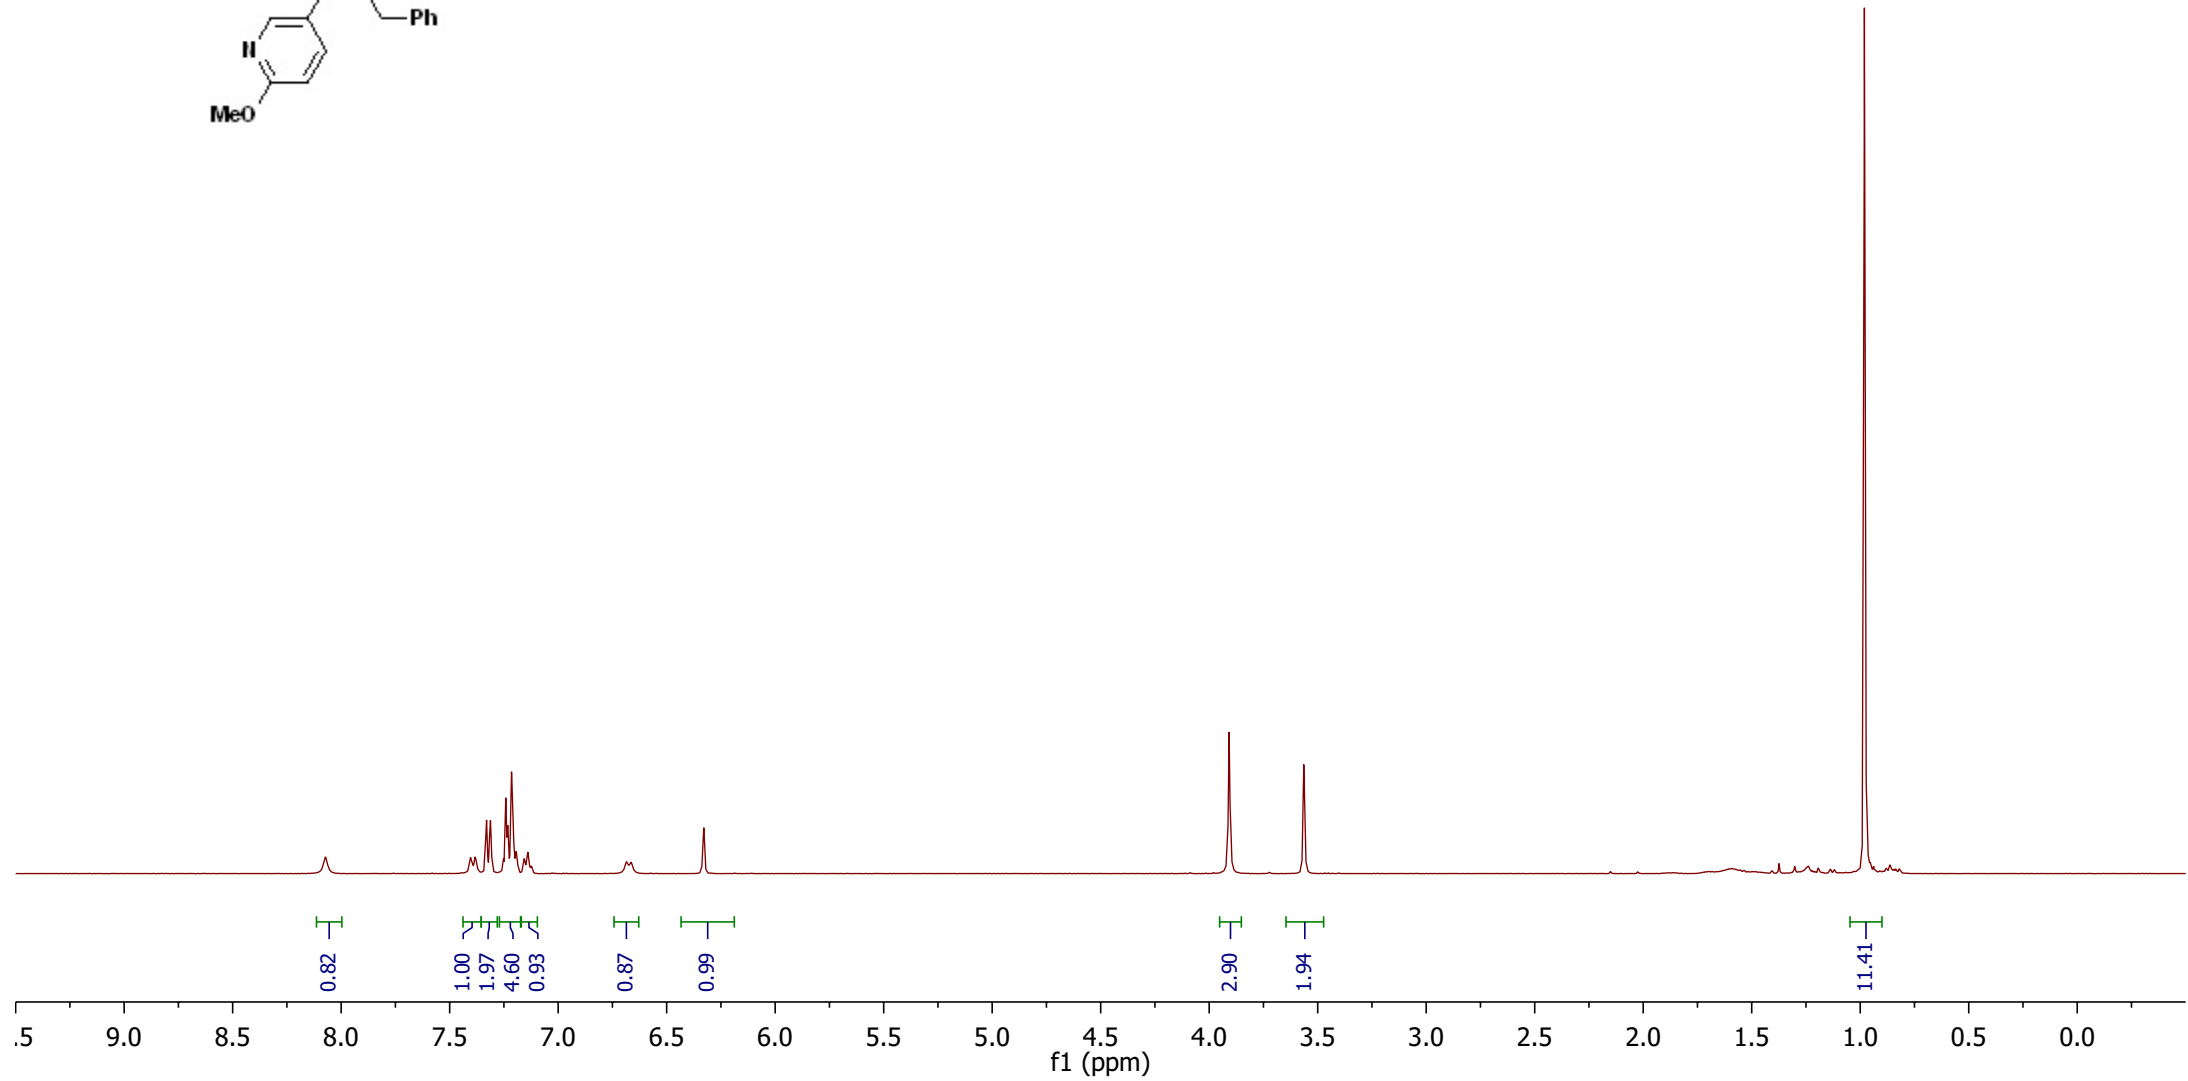

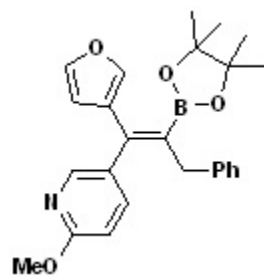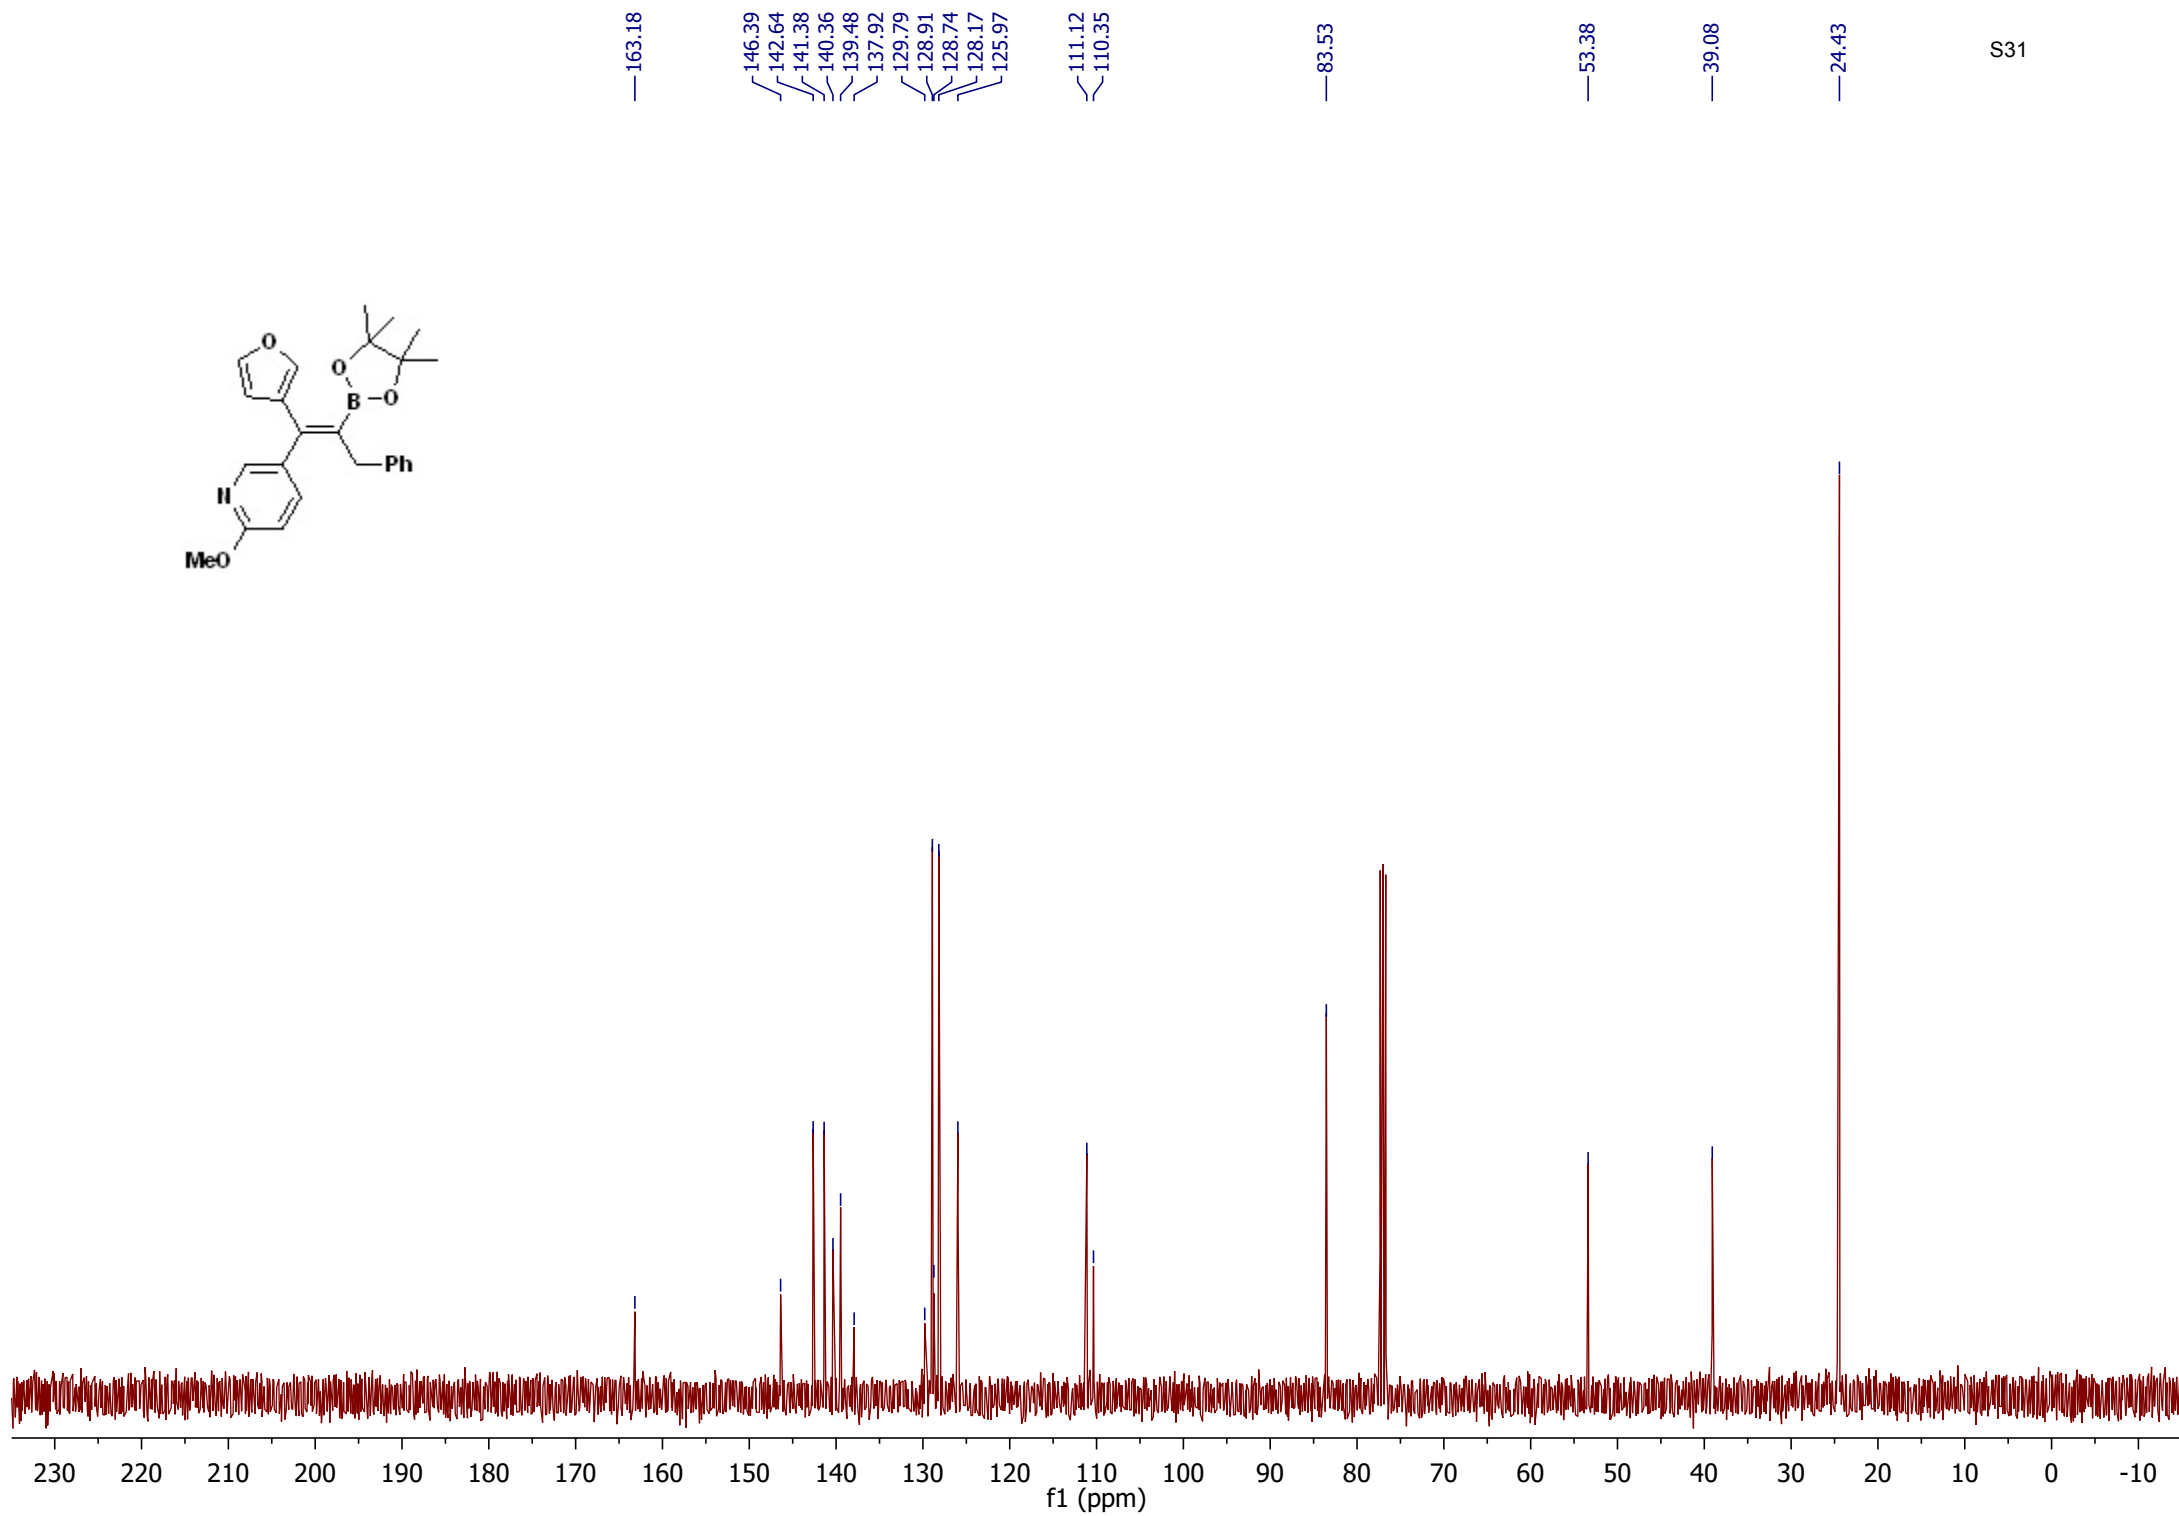

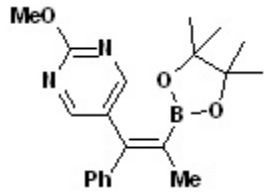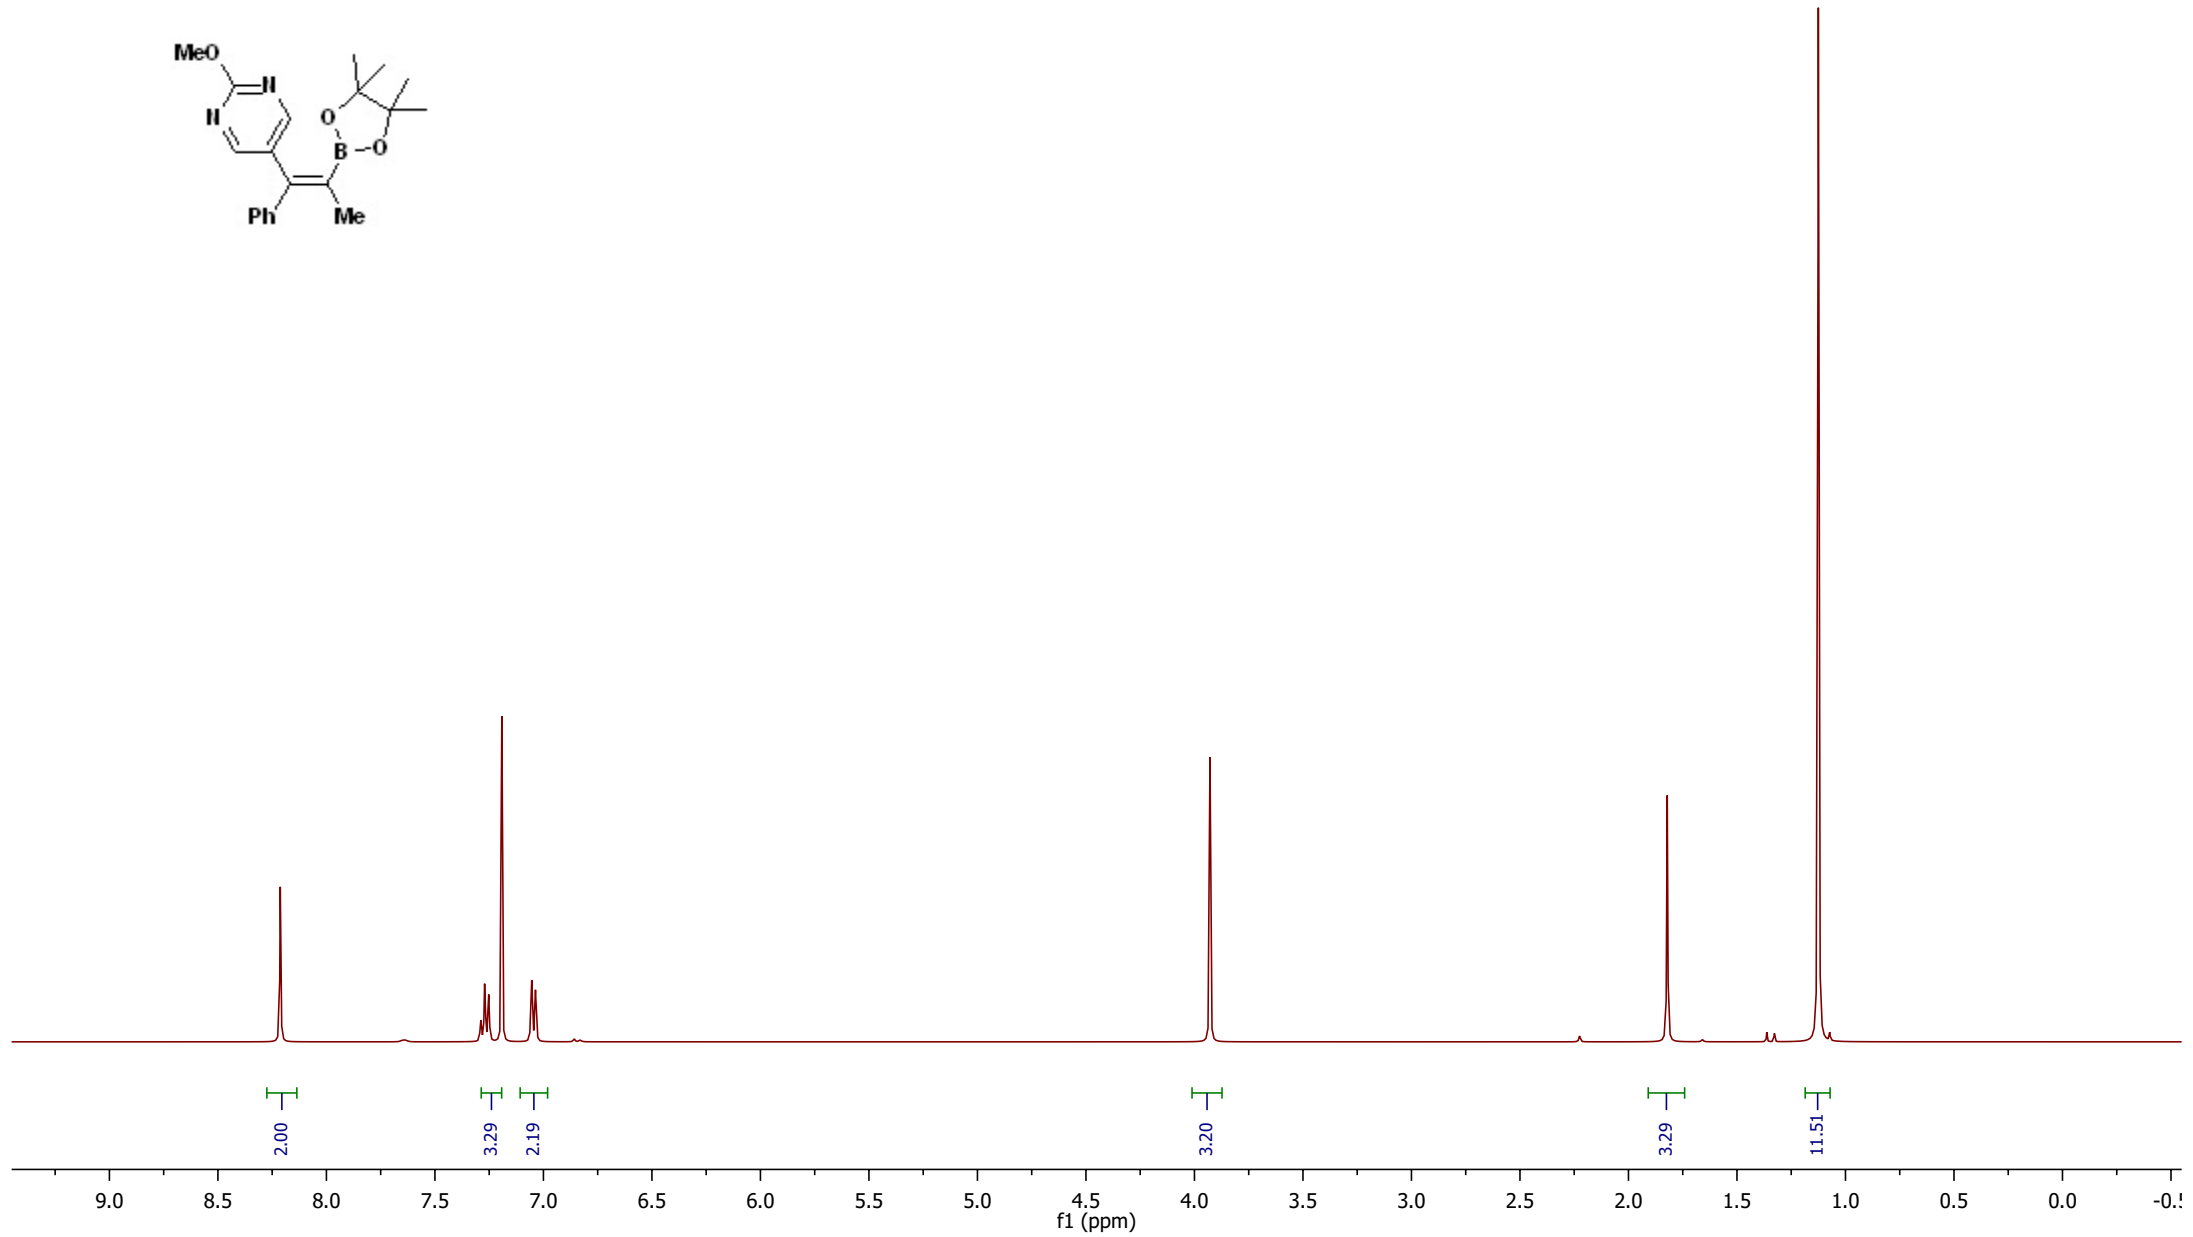



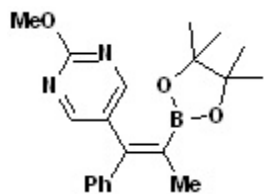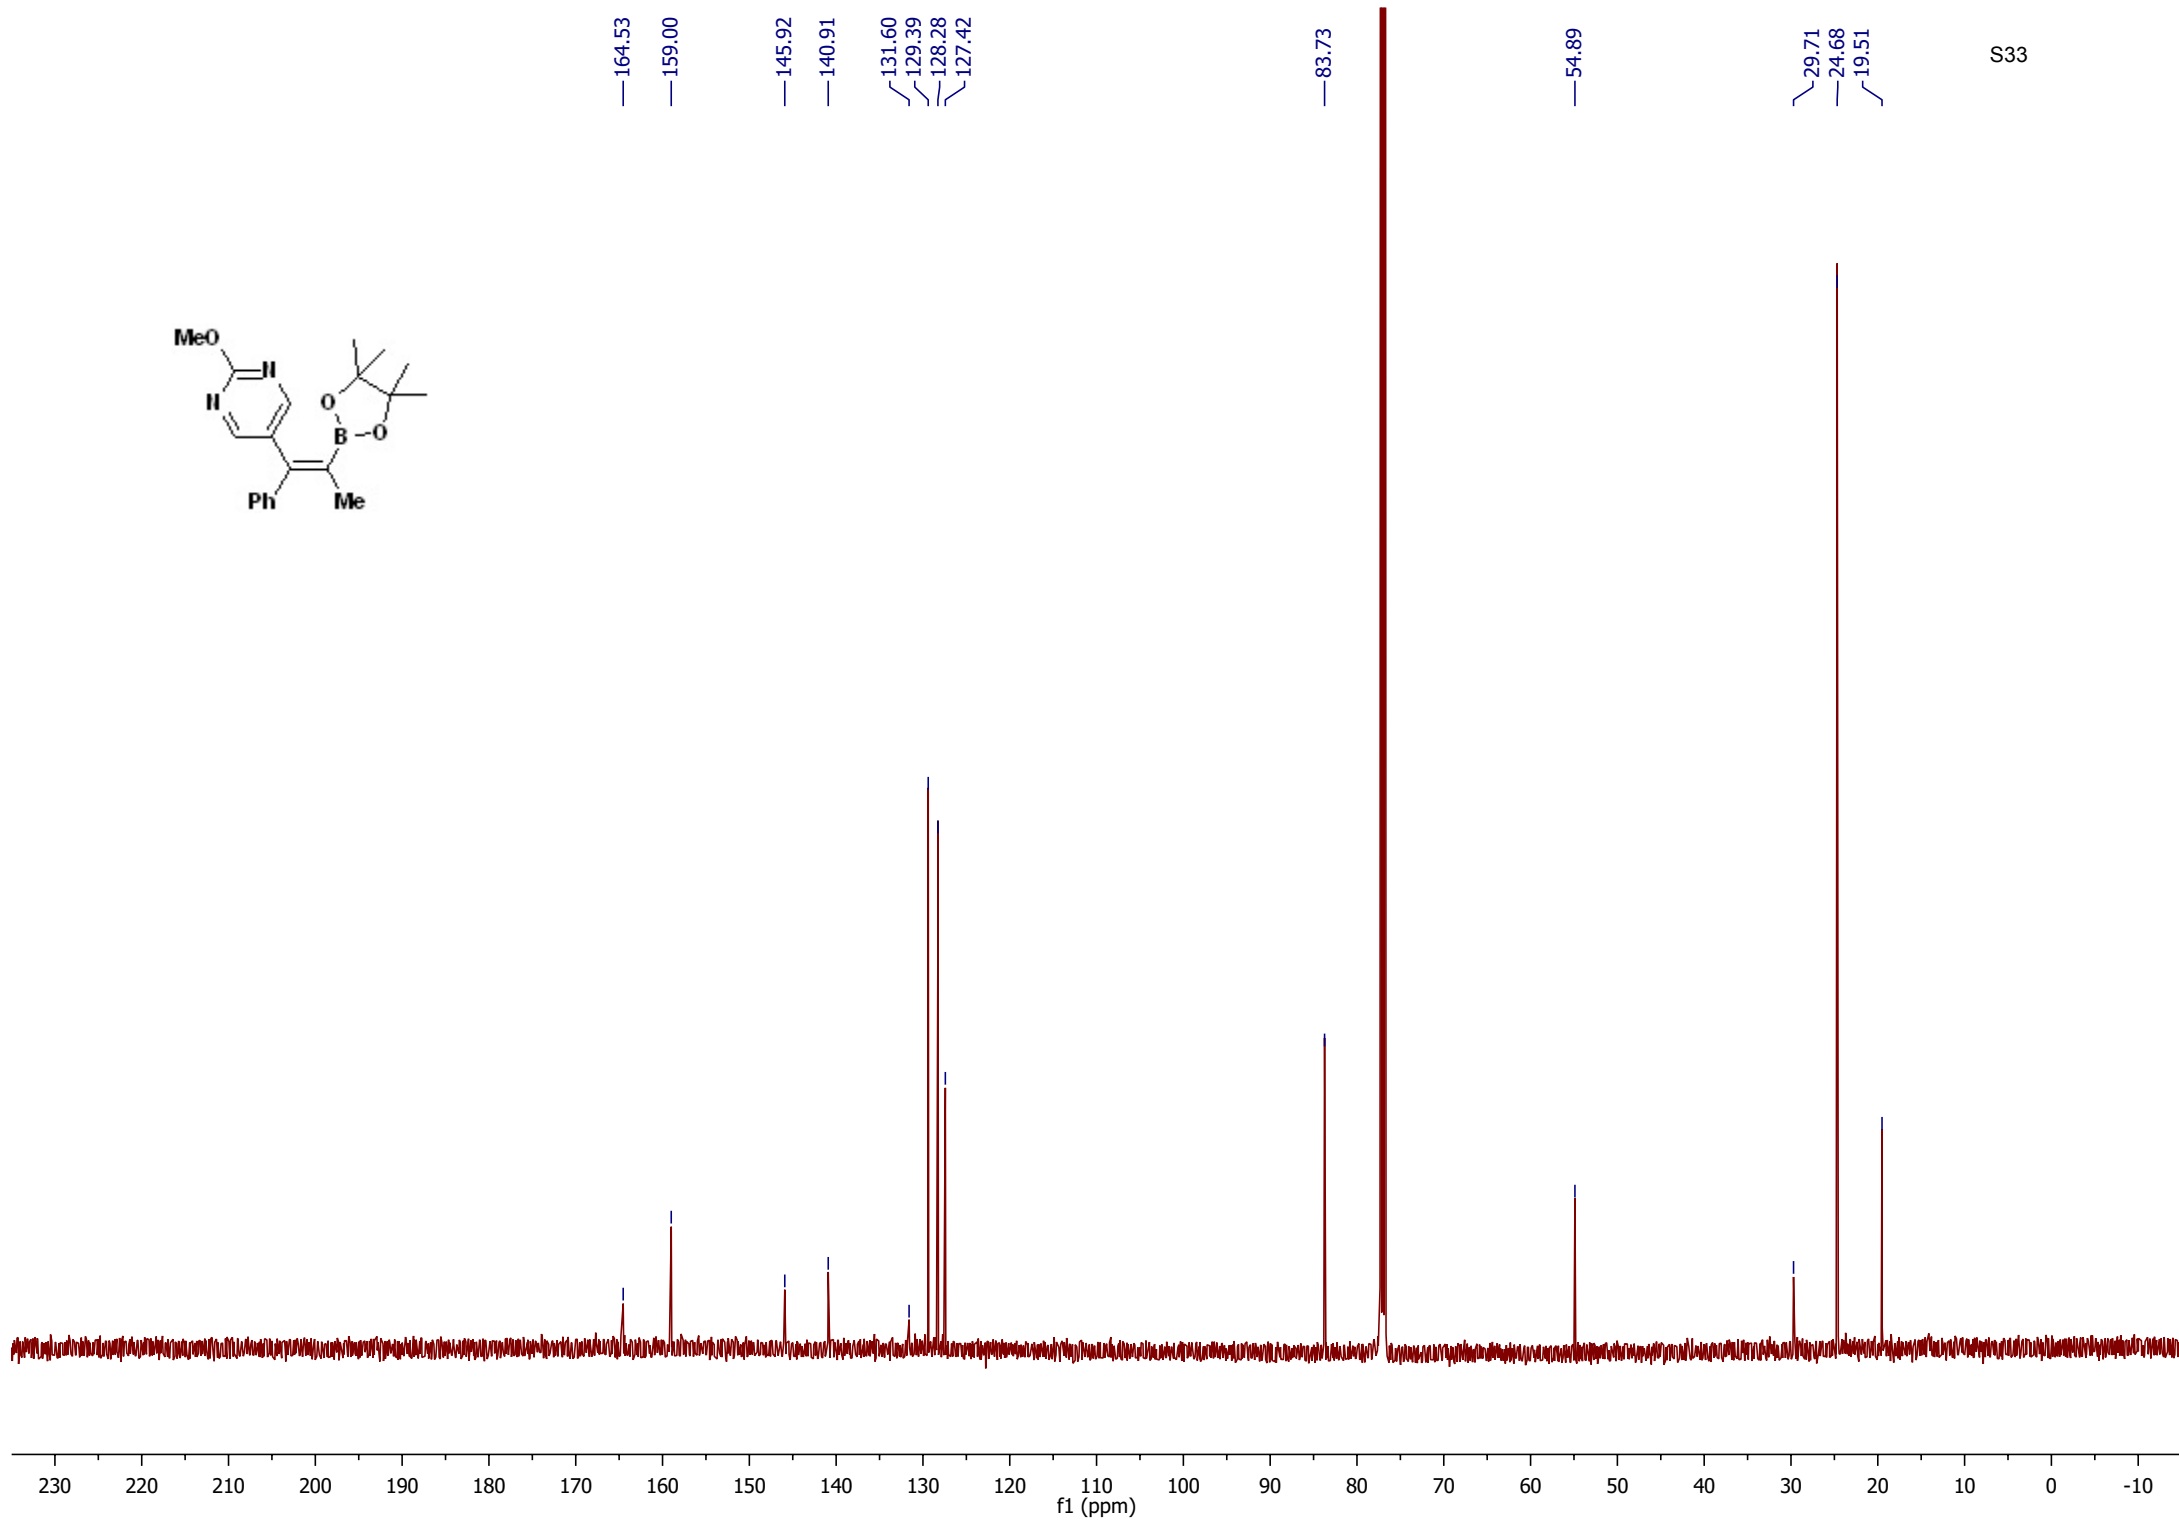

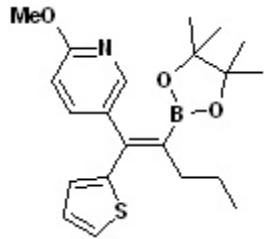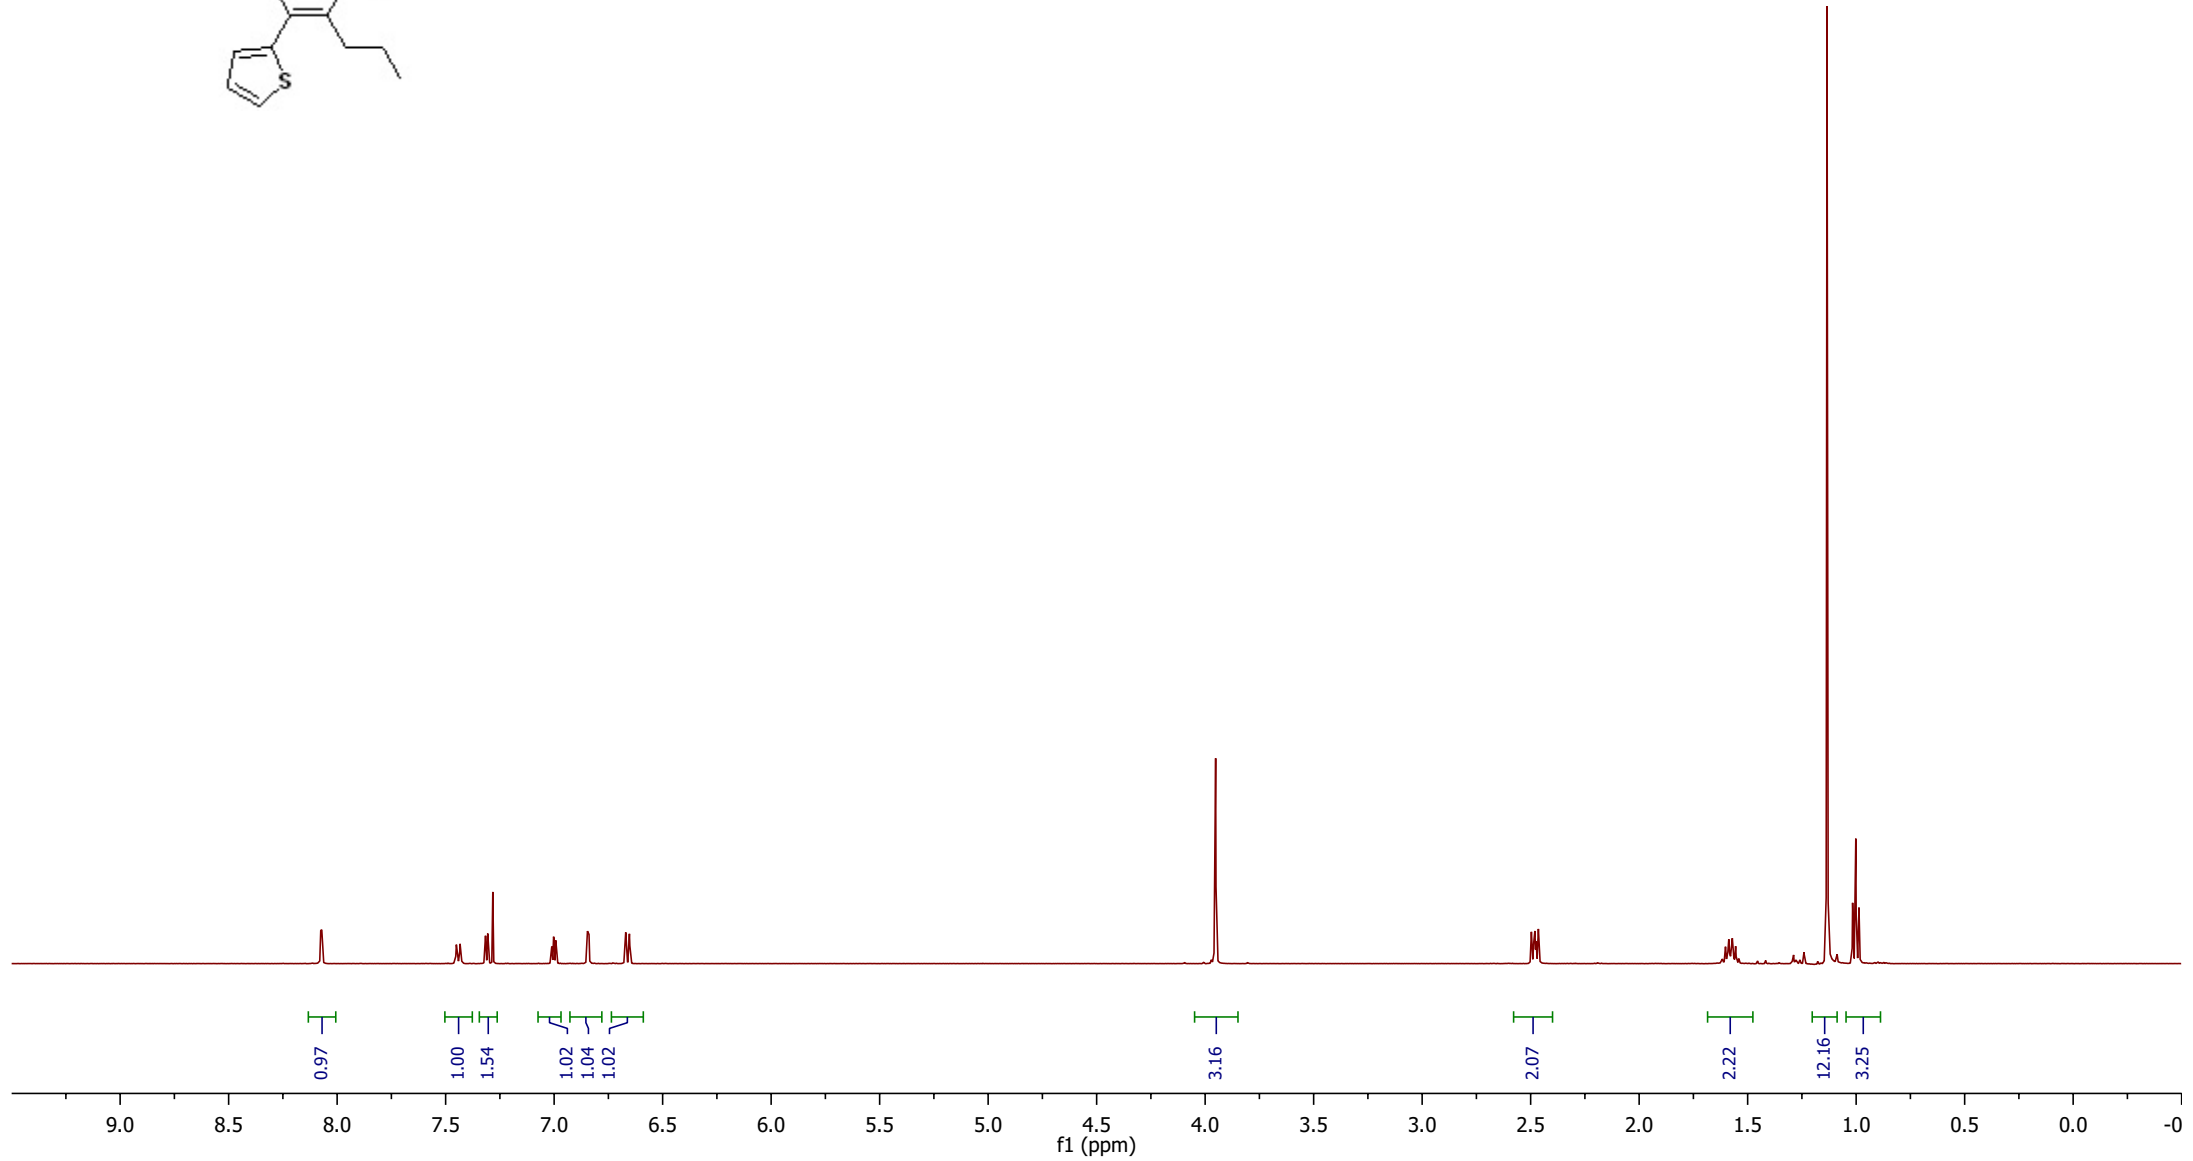

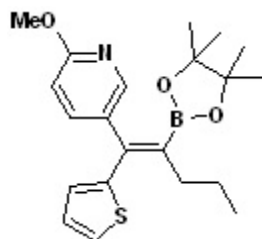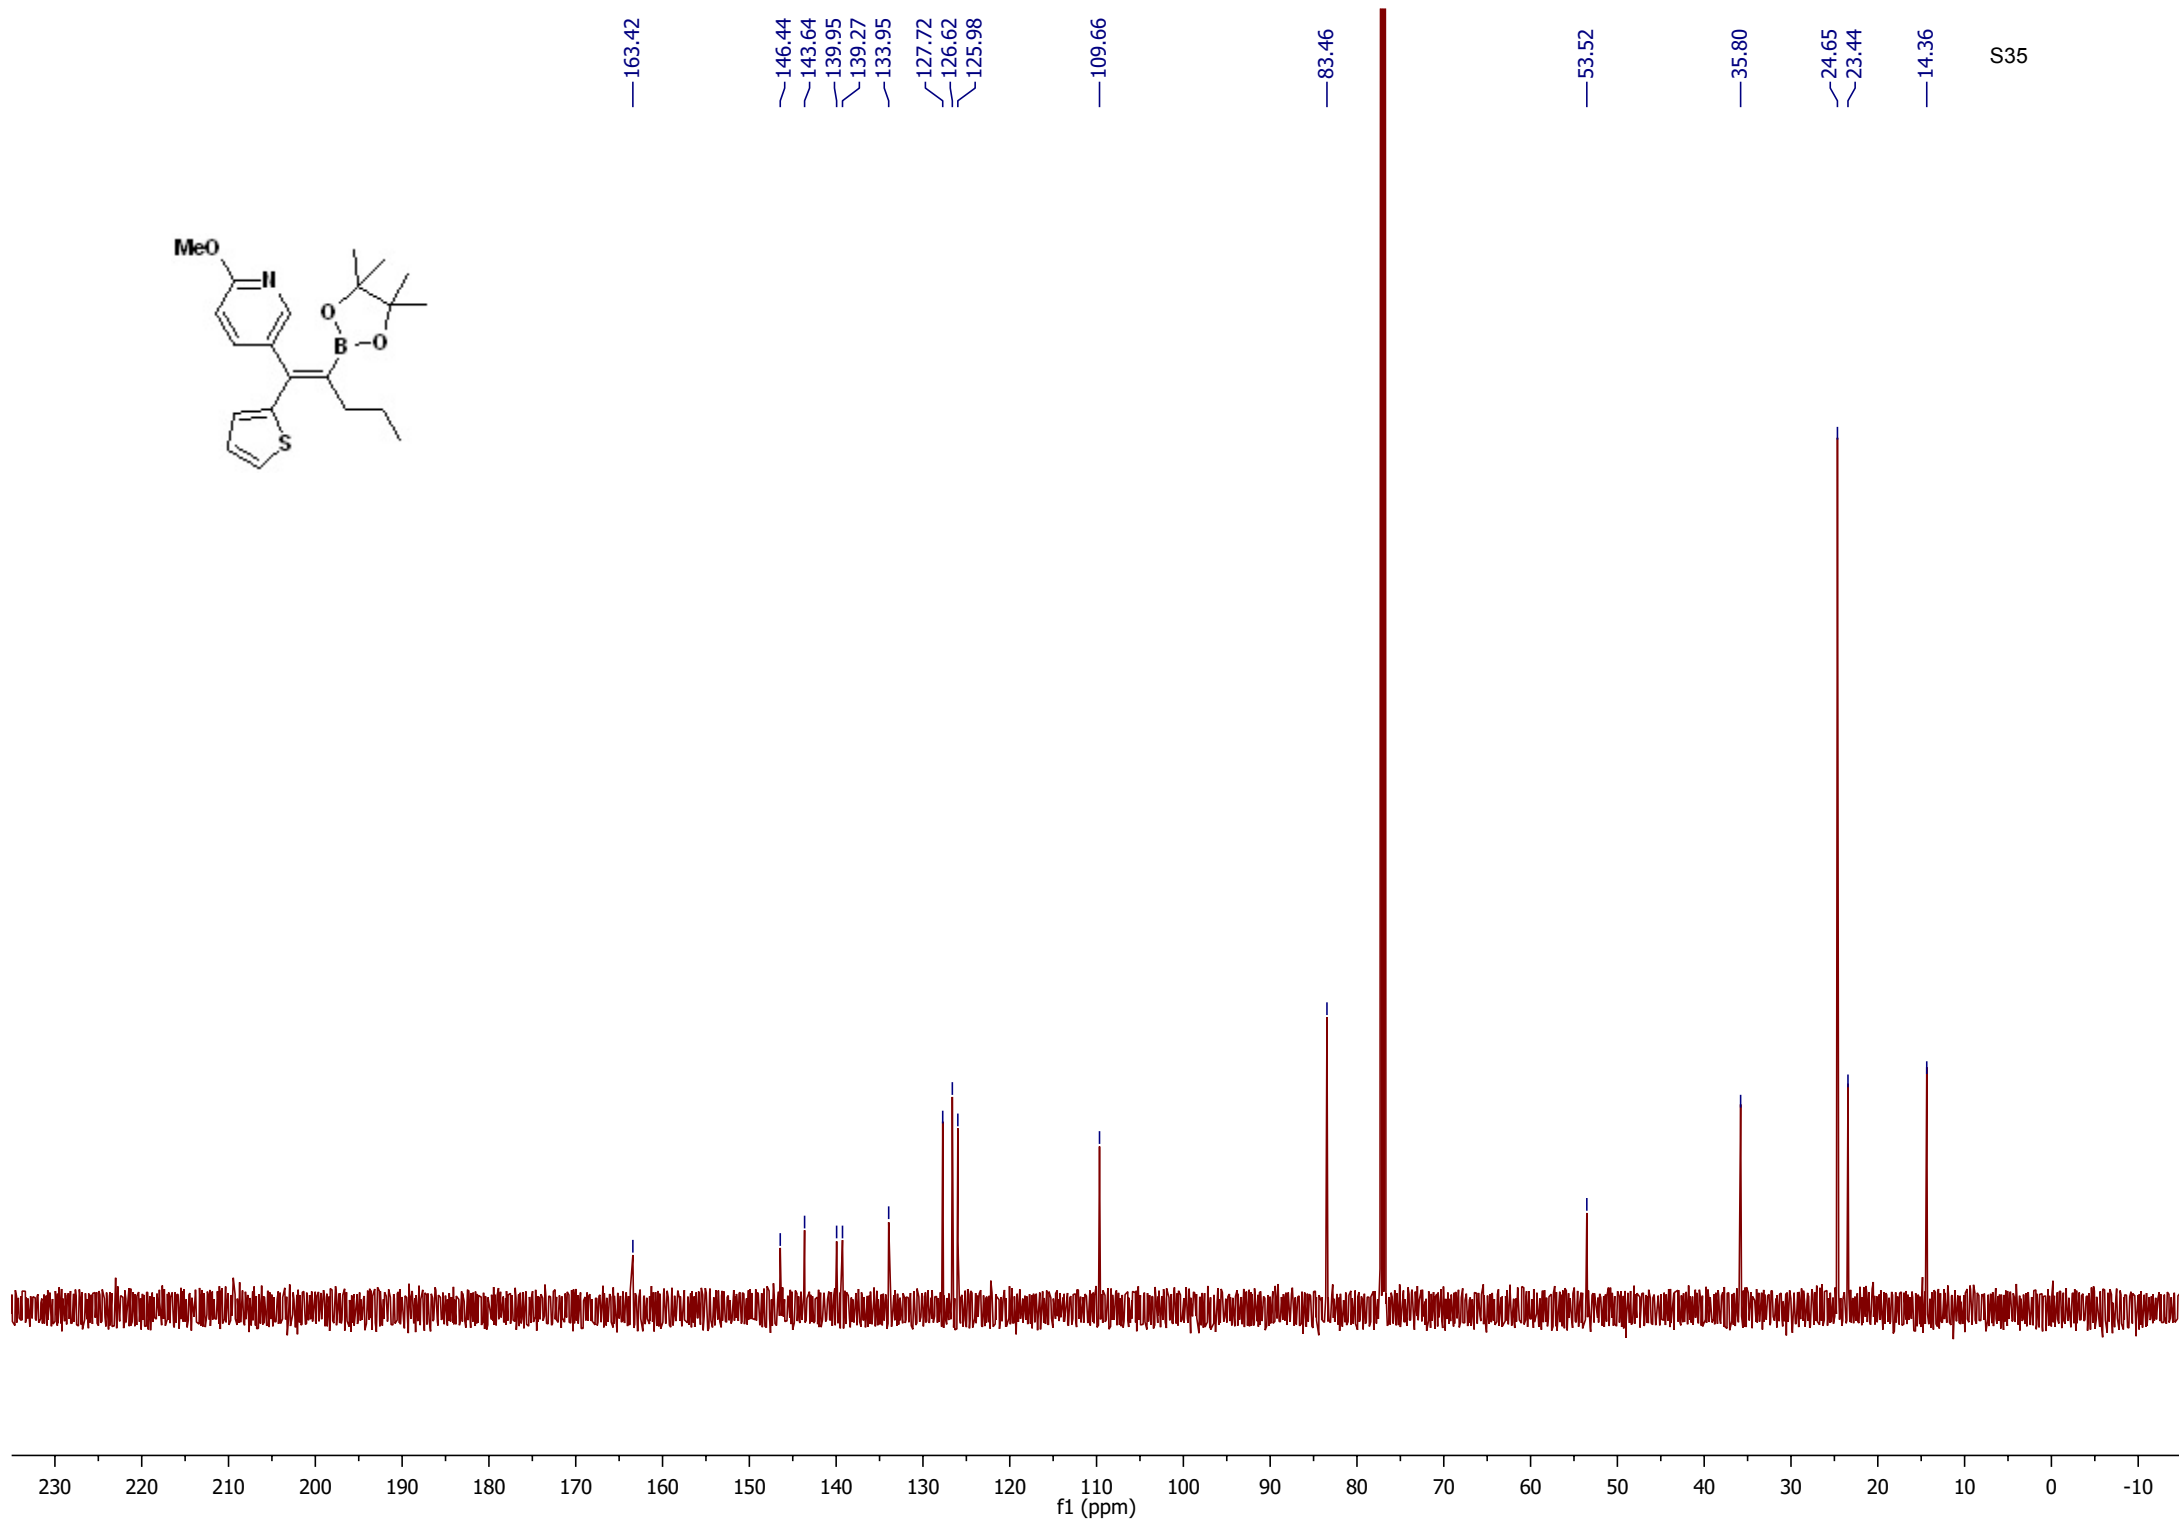

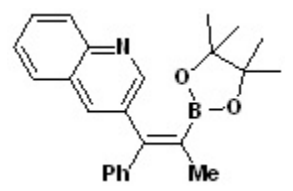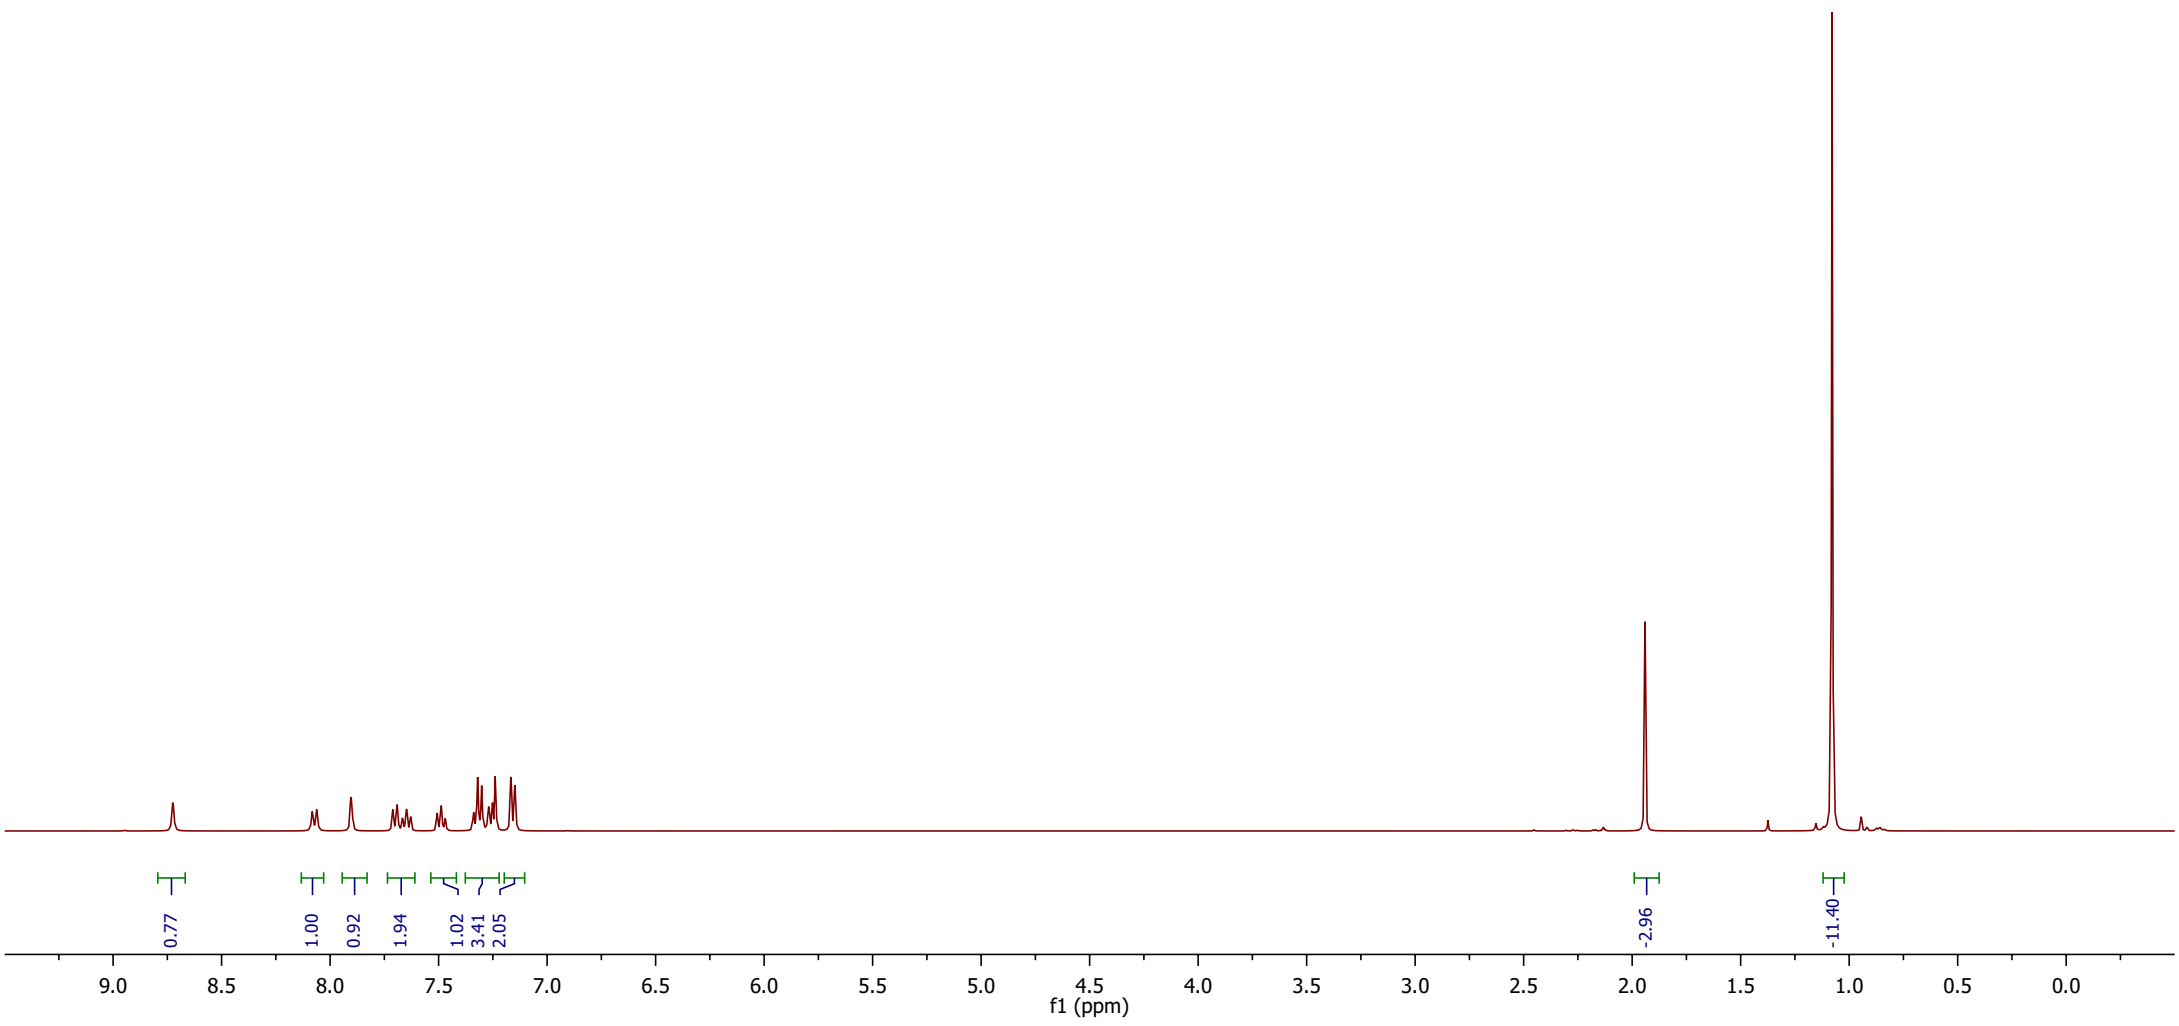

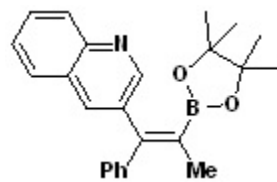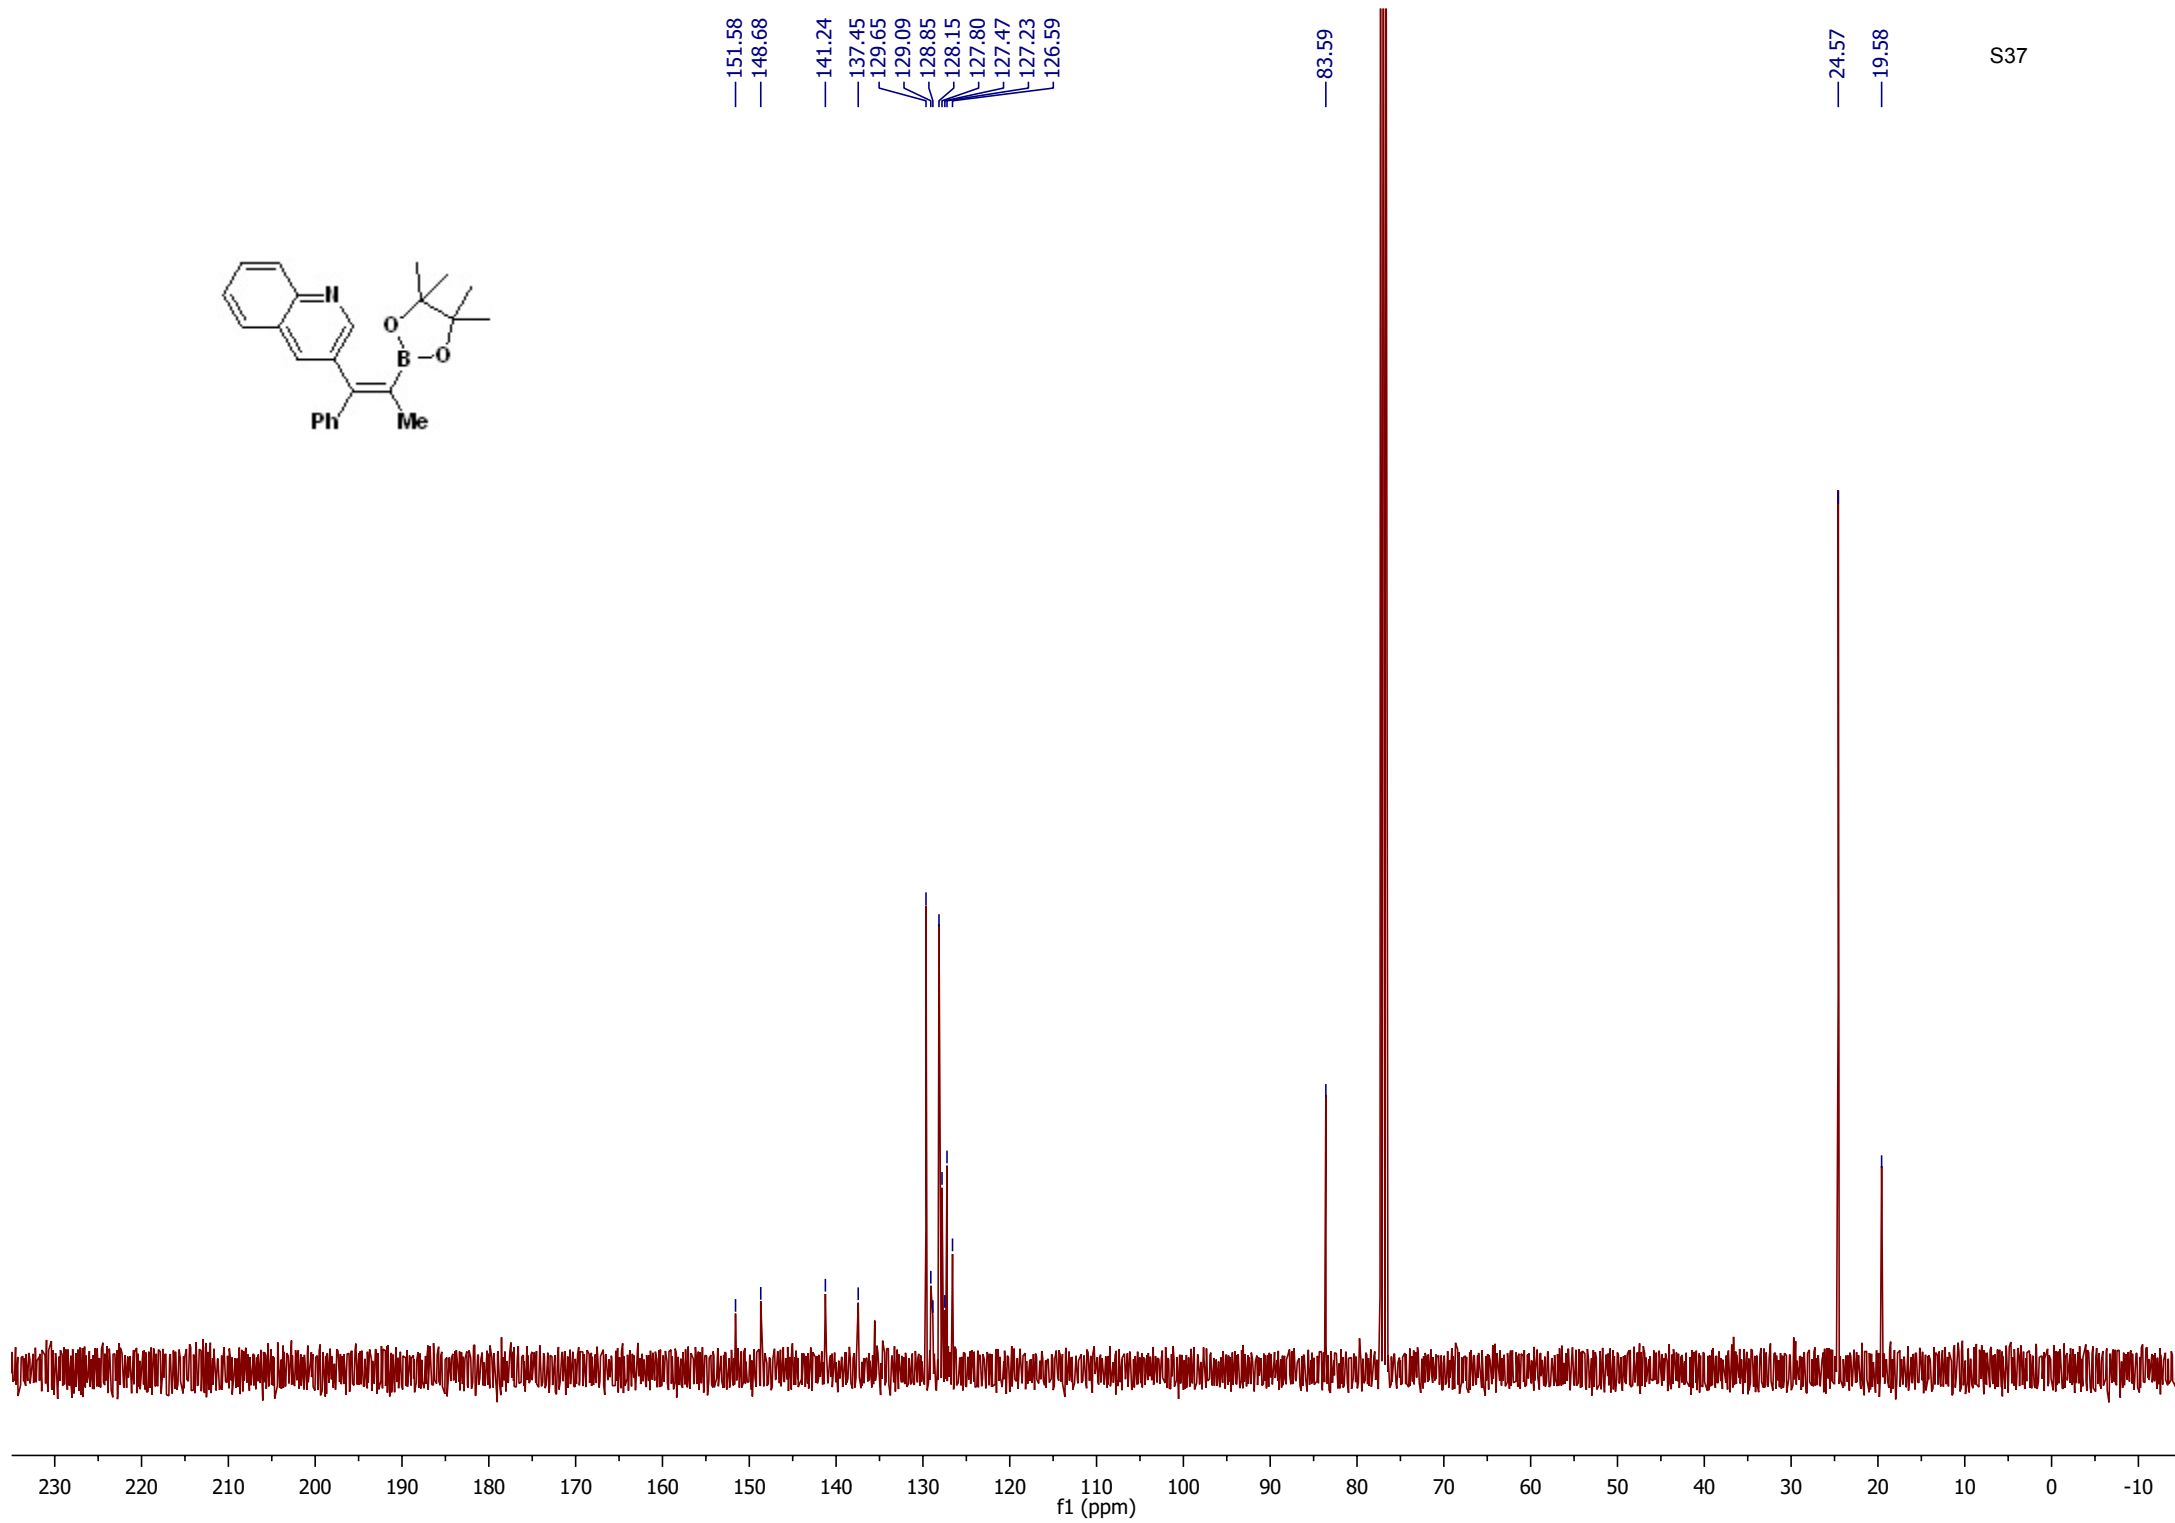

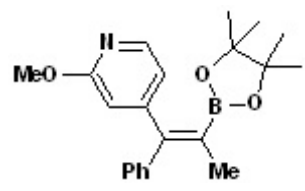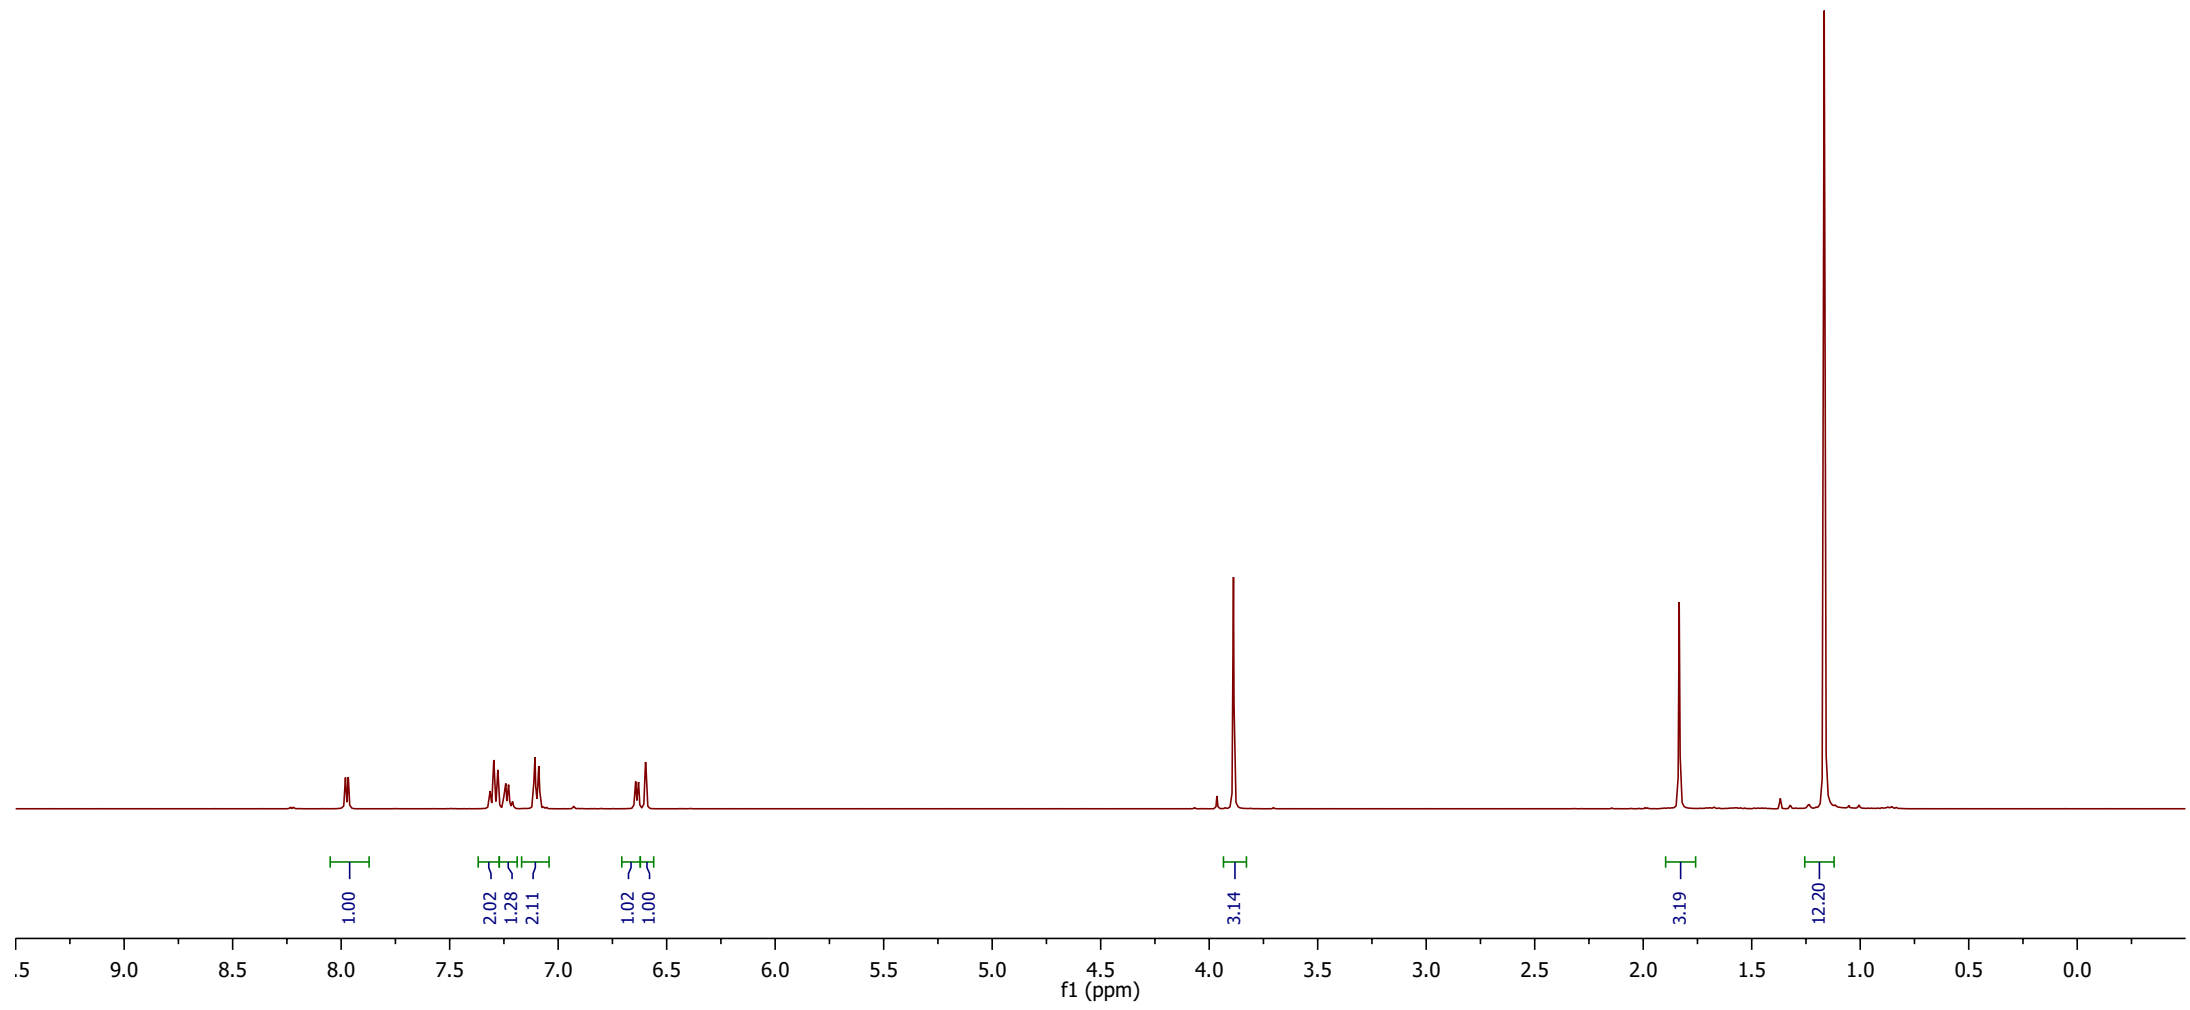

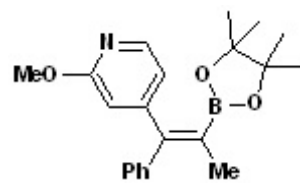

—163.98  
 —154.70  
 148.79  
 145.93  
 140.43  
 129.42  
 128.07  
 127.14  
 —117.72  
 —111.02  
 —83.61  
 —53.32  
 —24.50  
 —19.17

S39

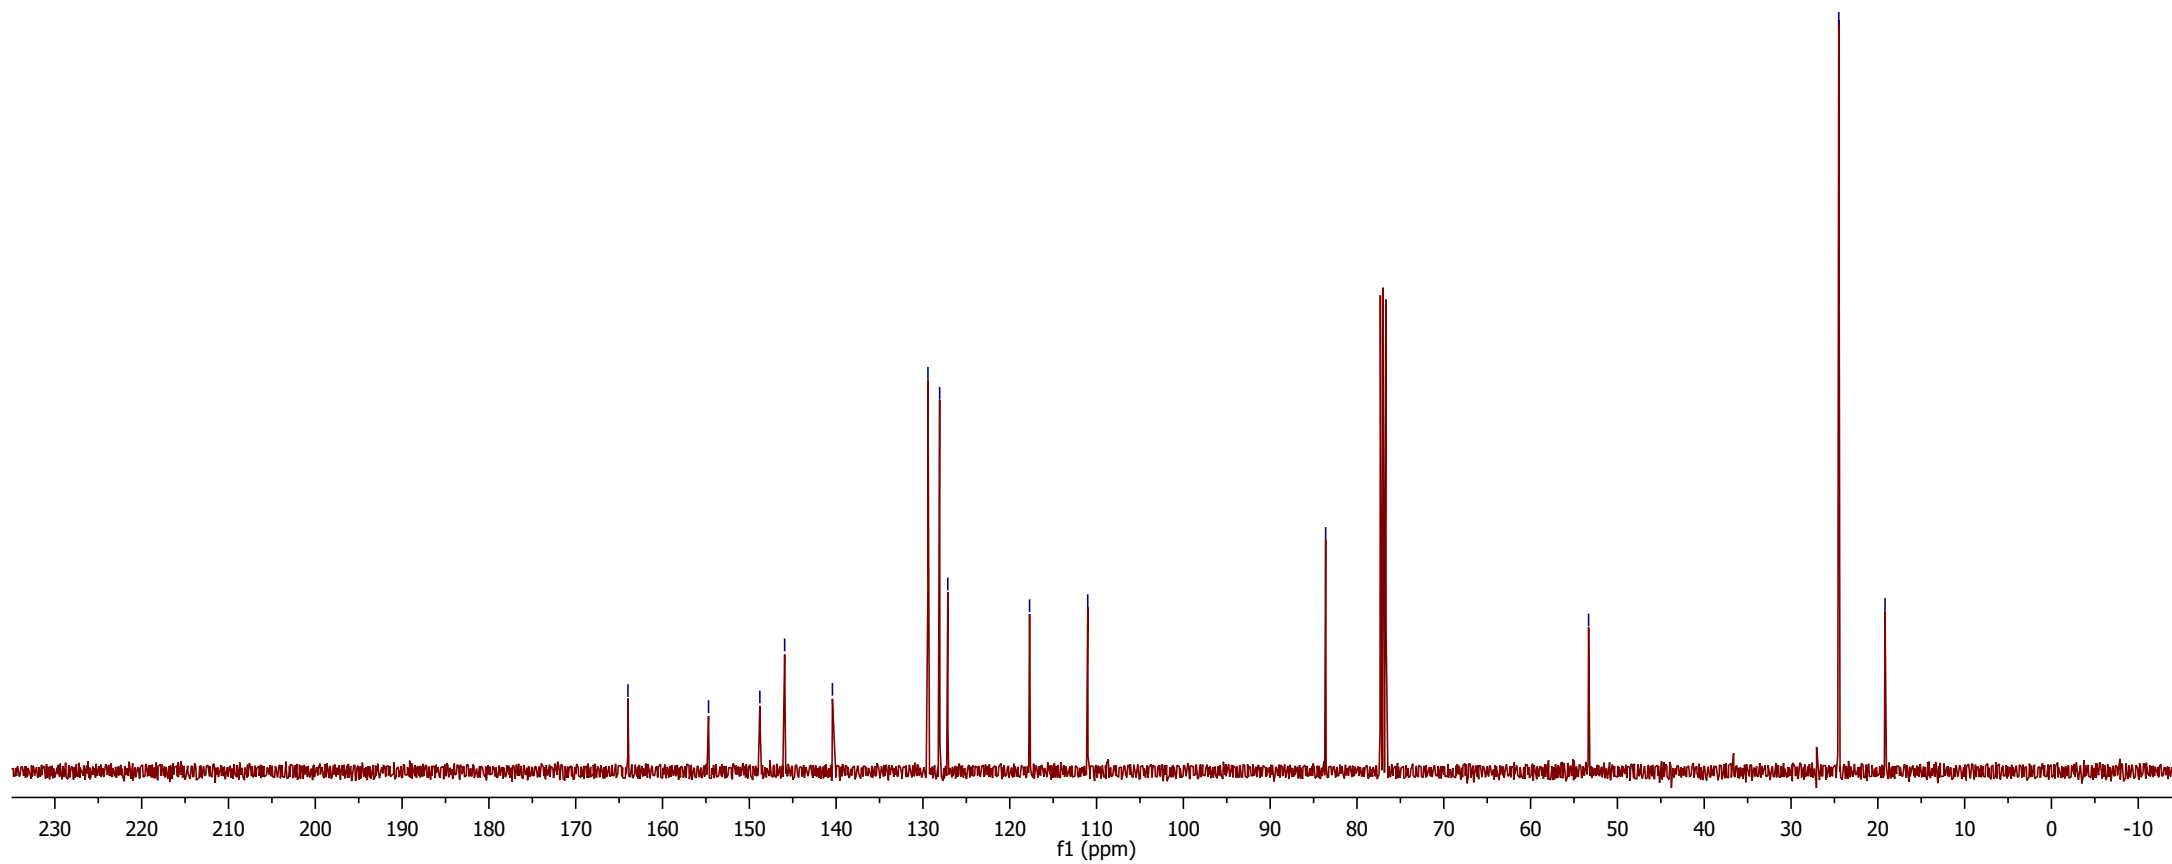

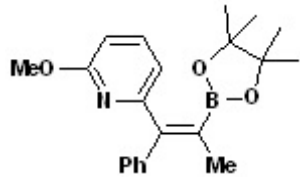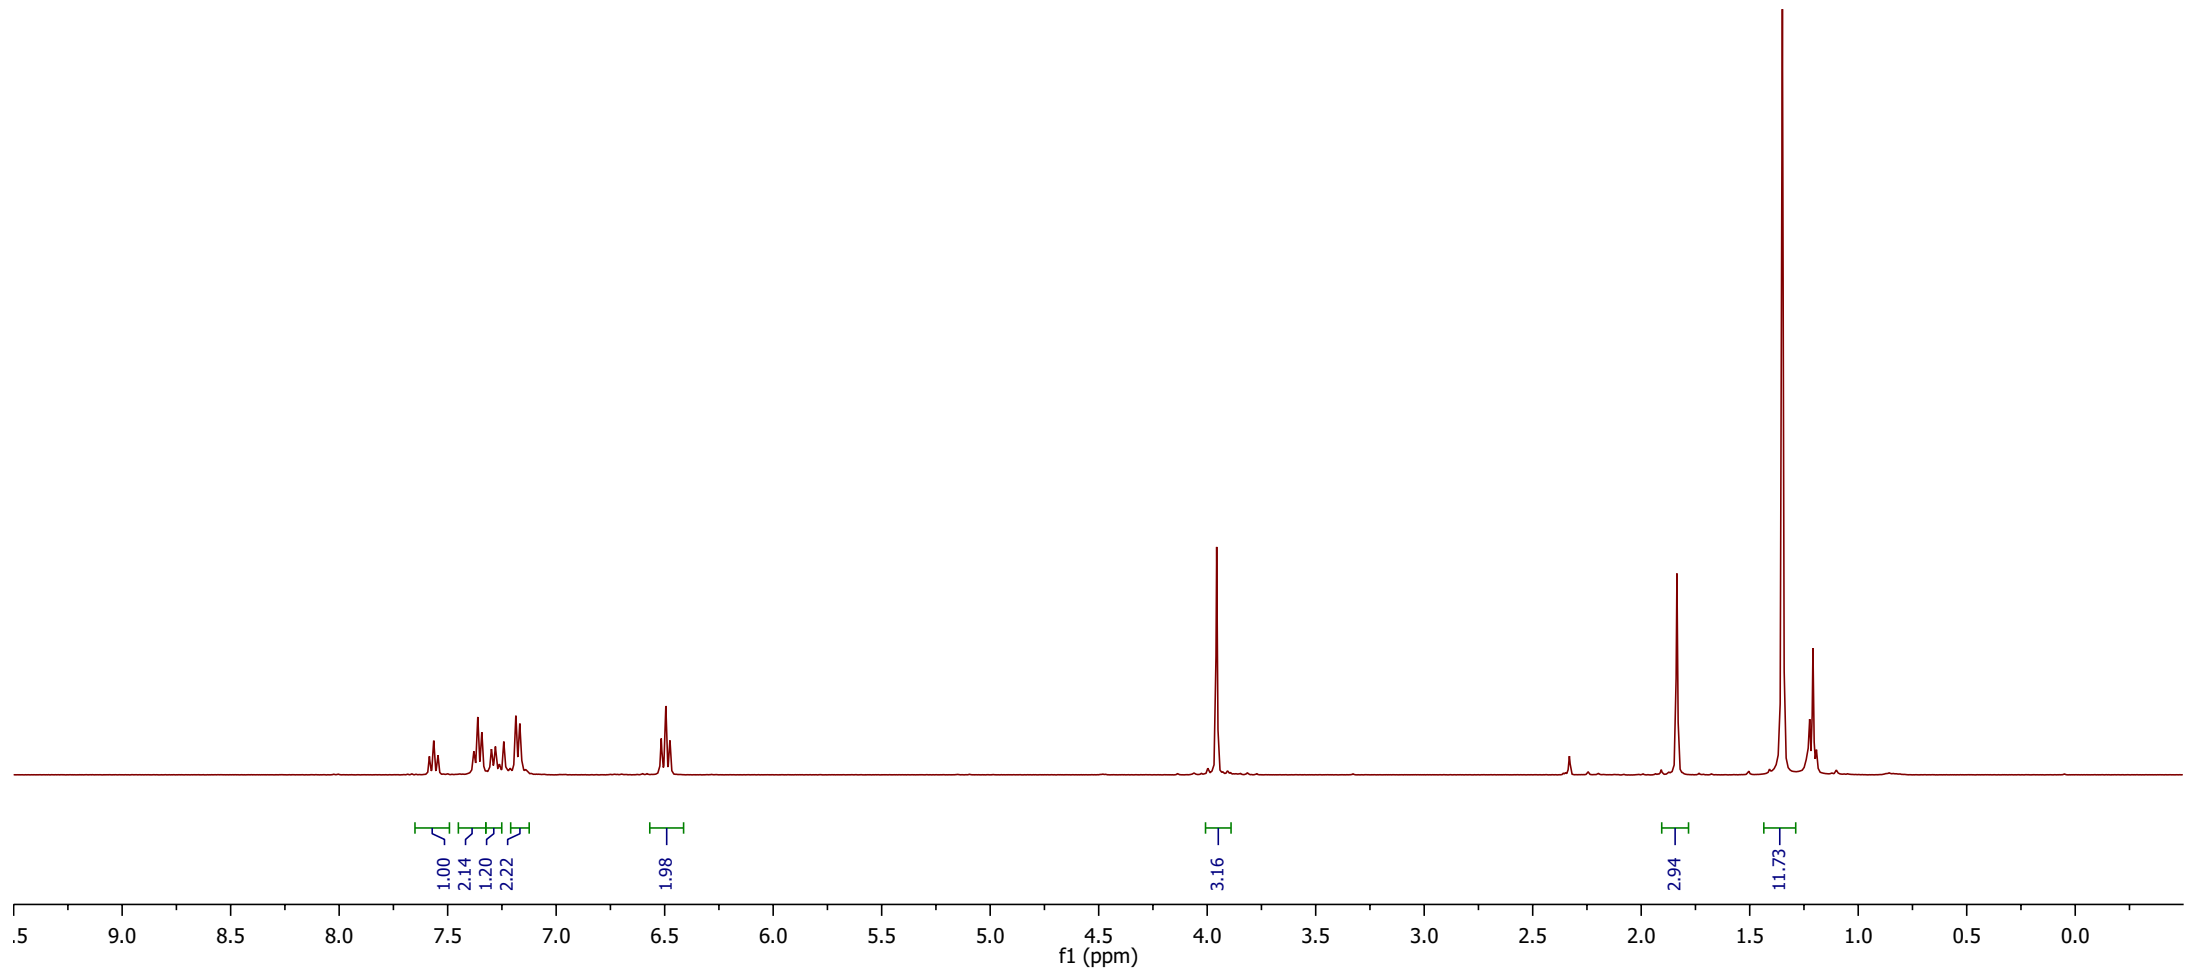



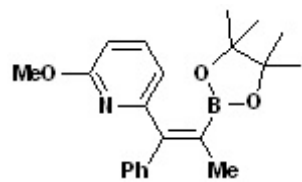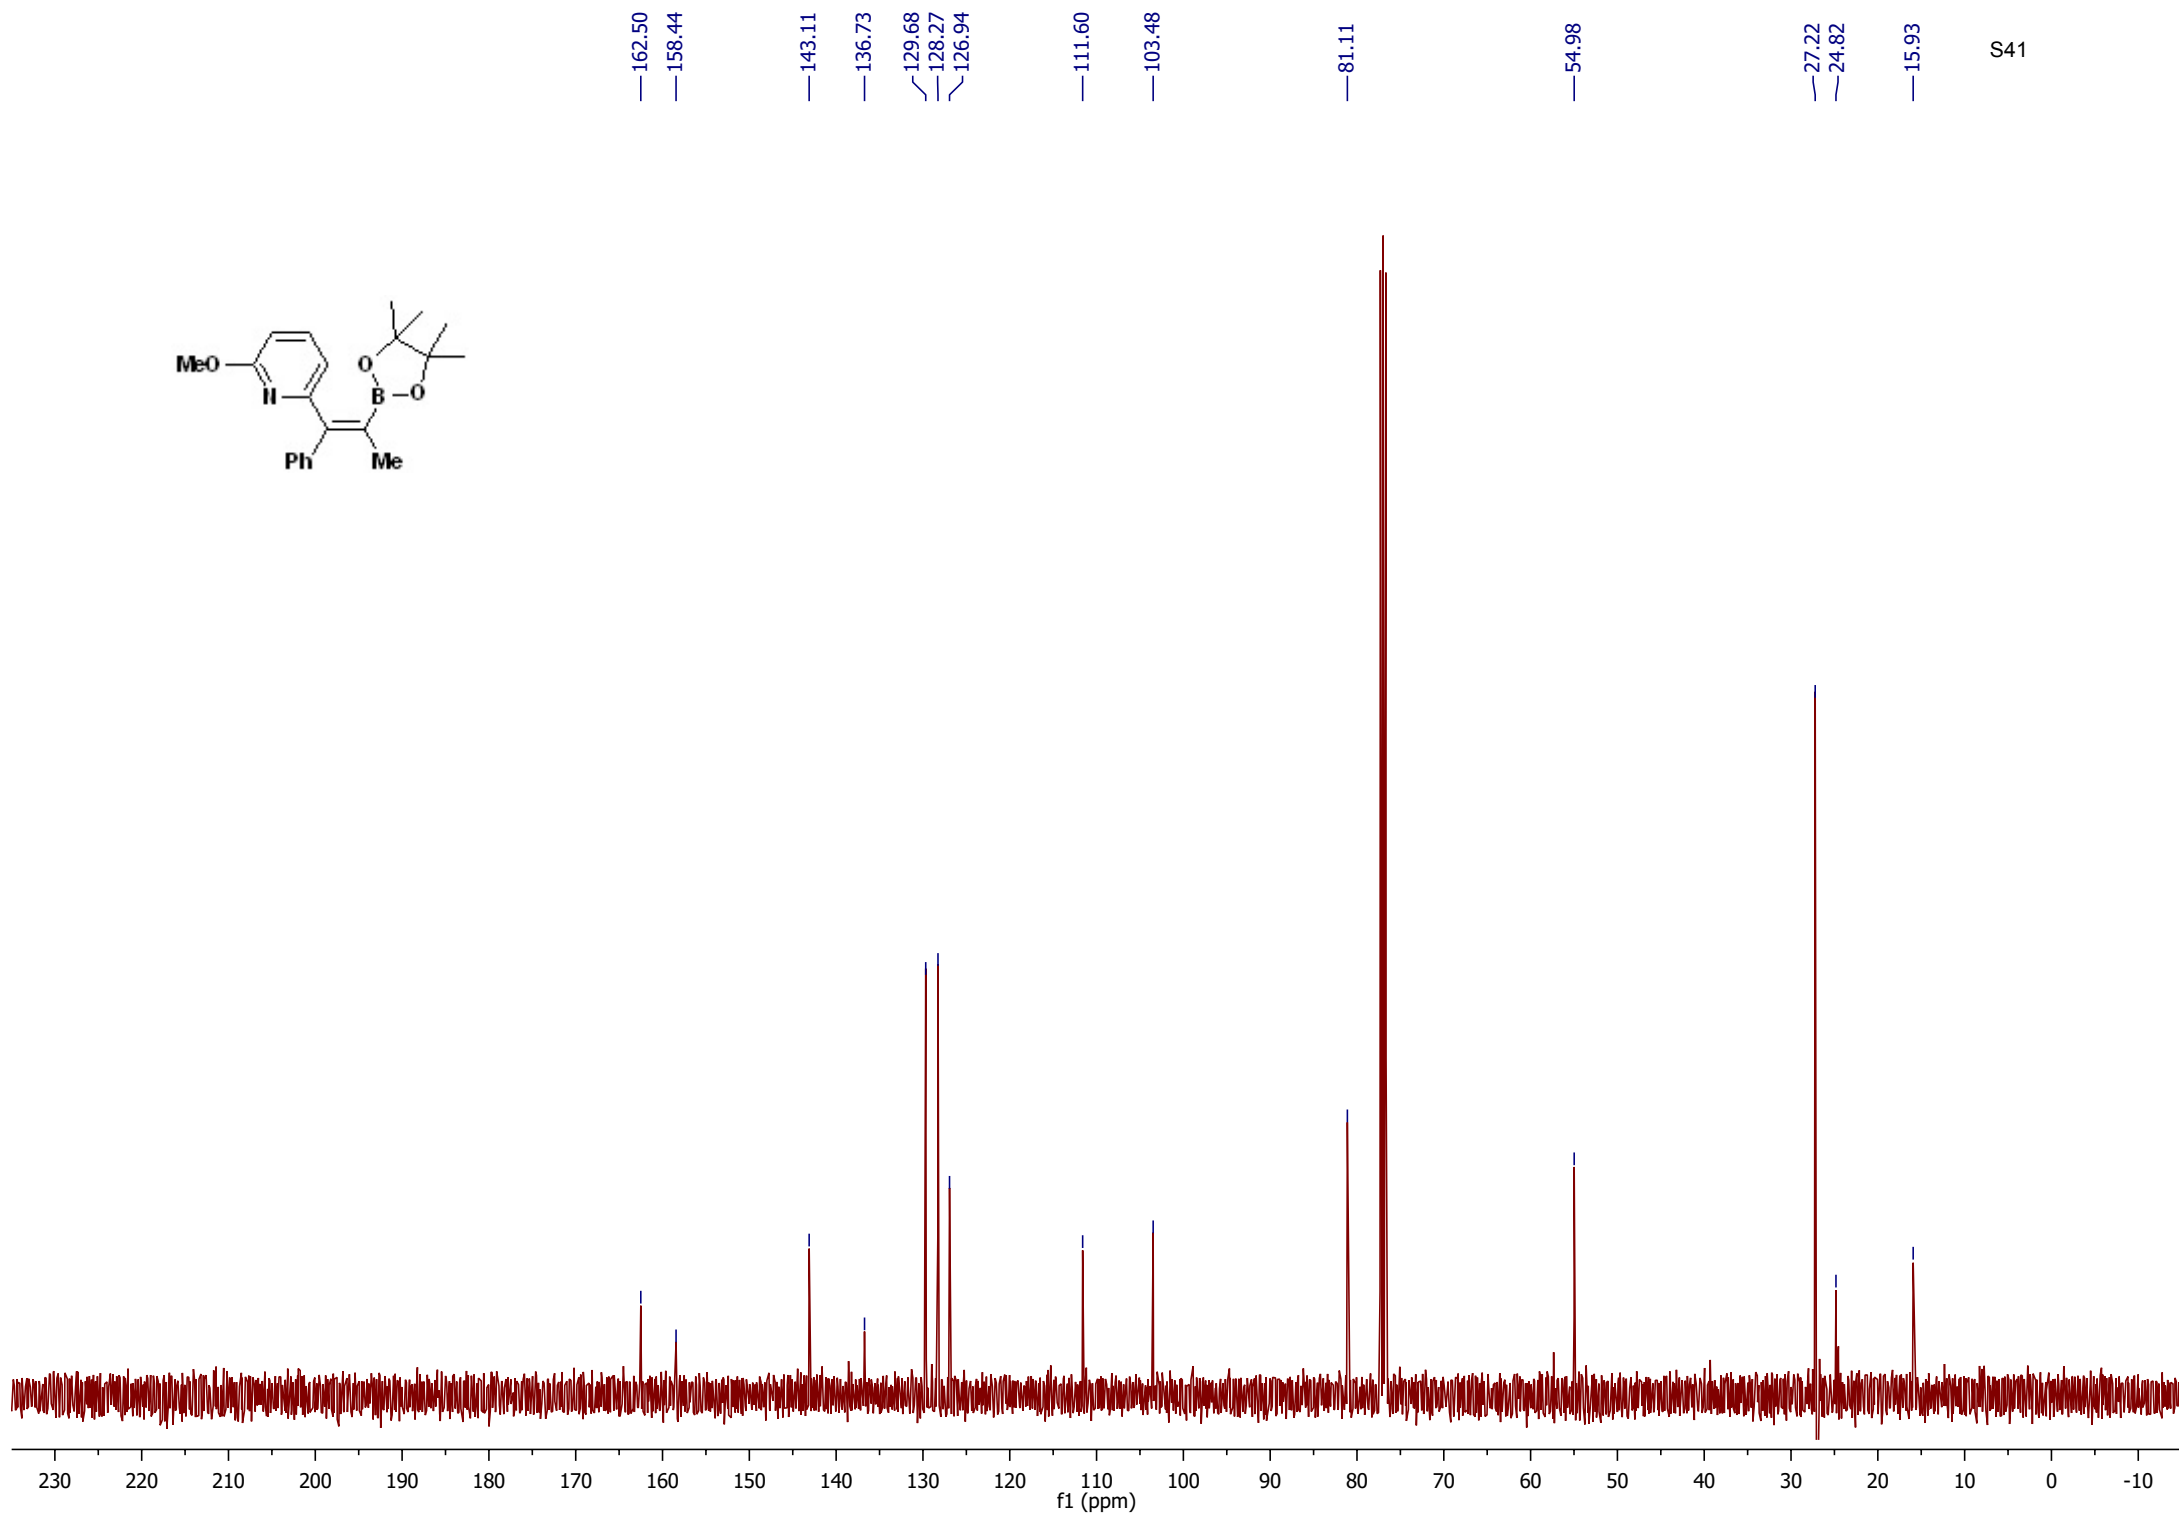

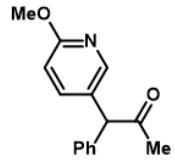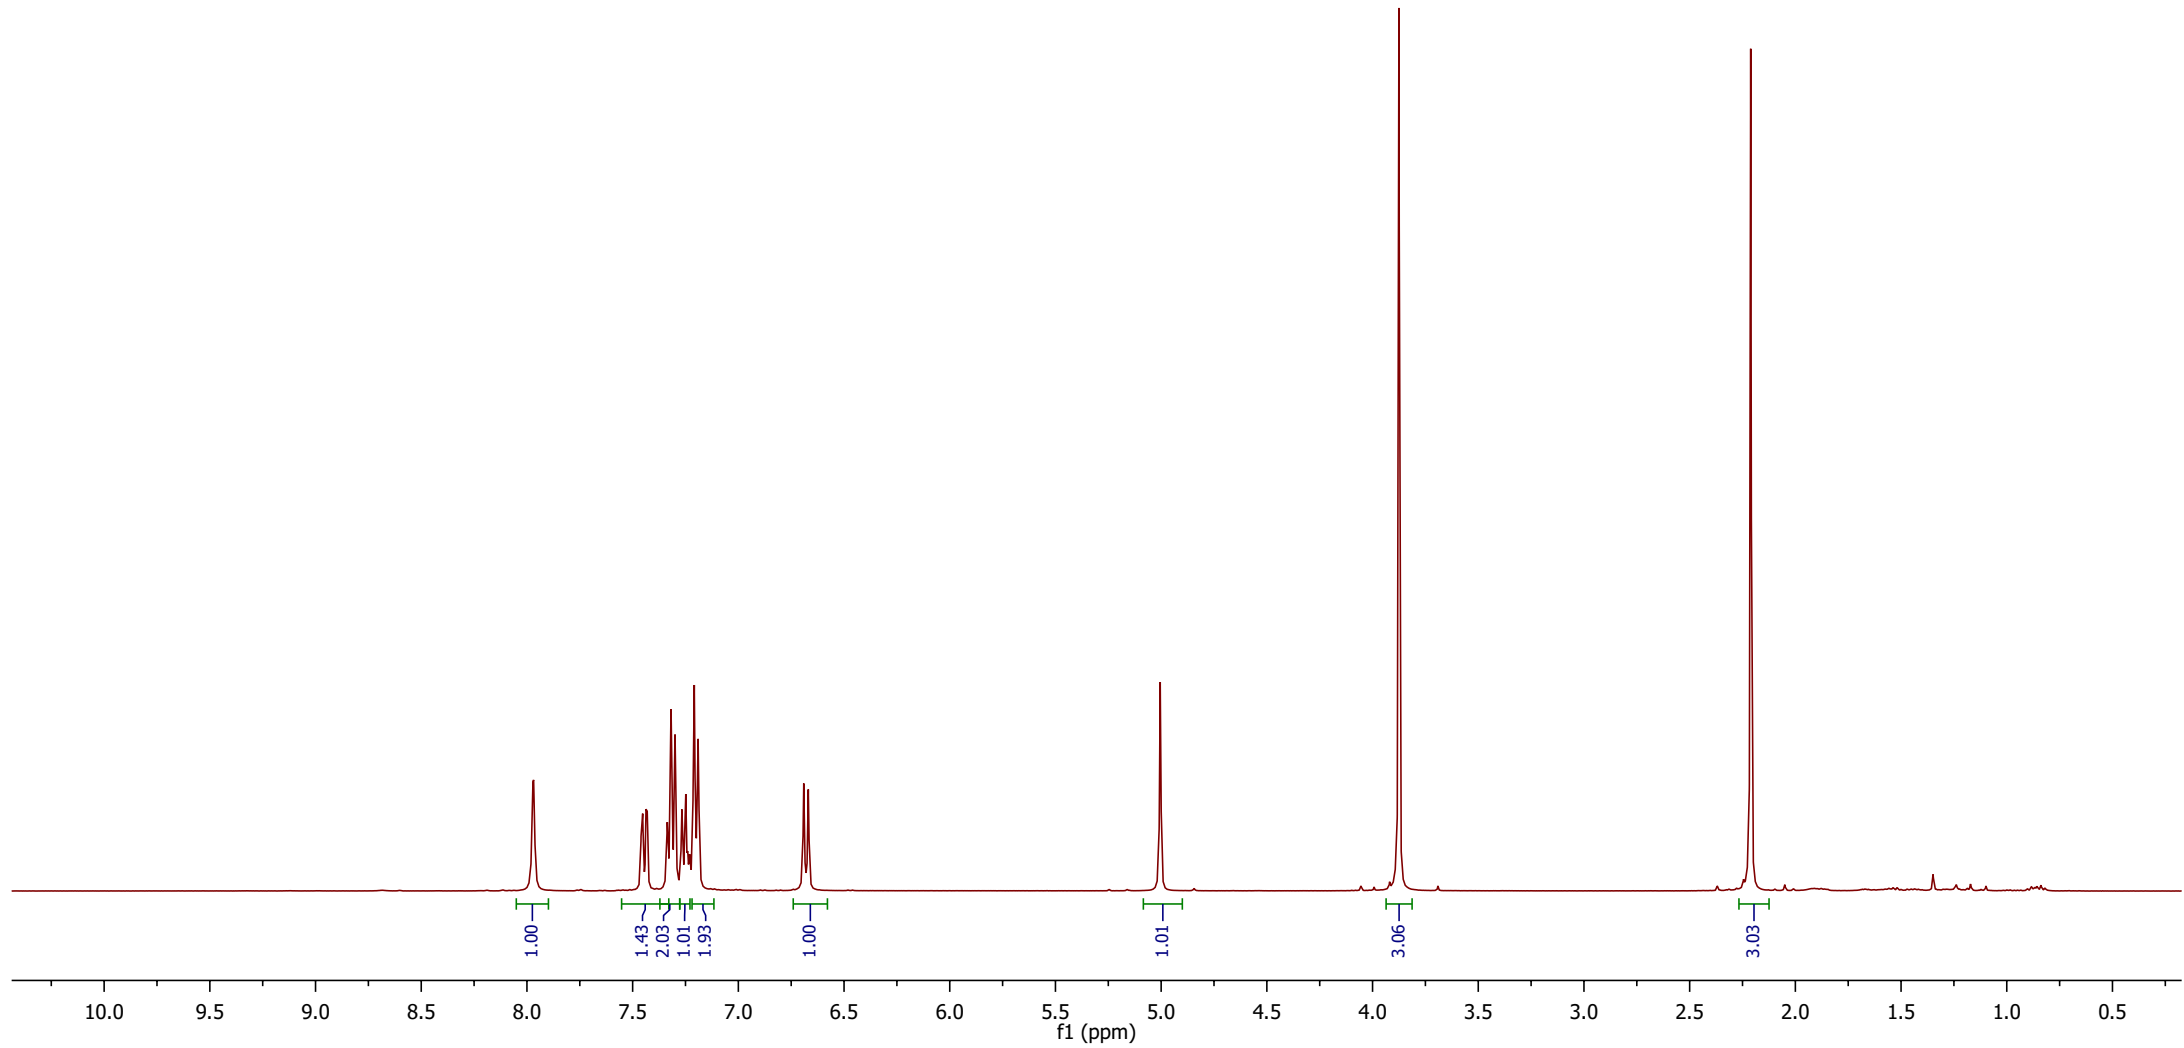

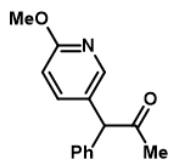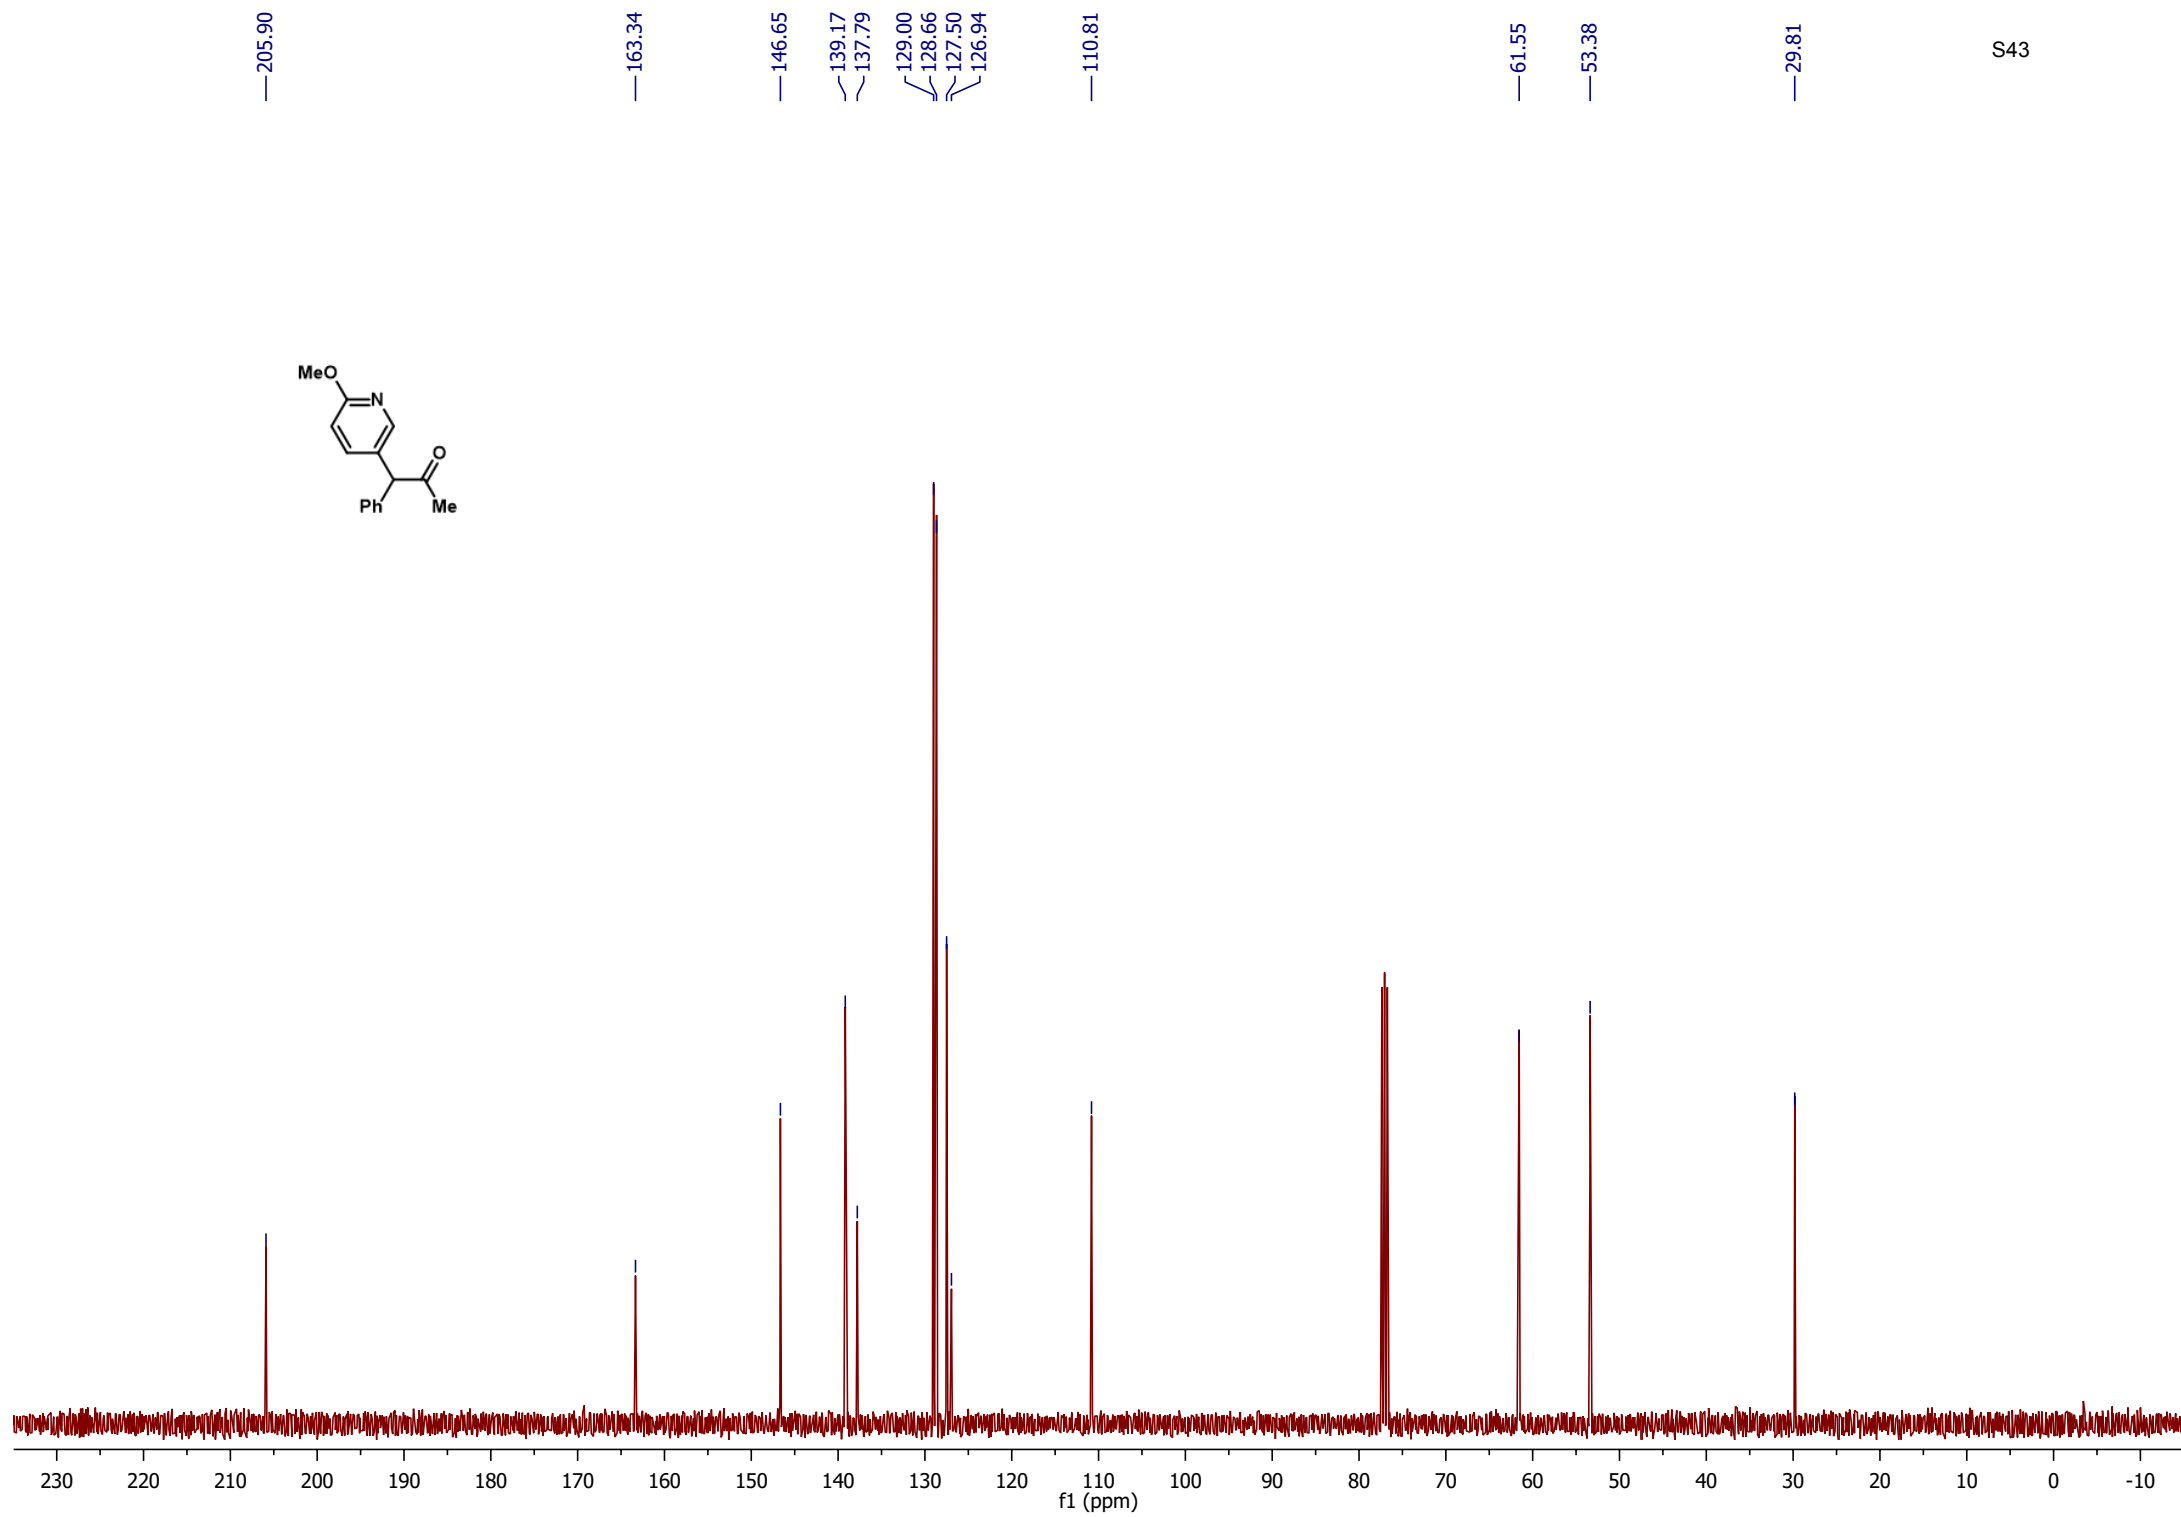

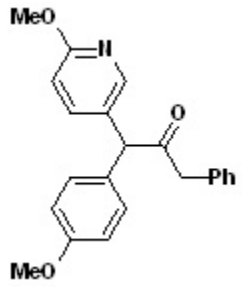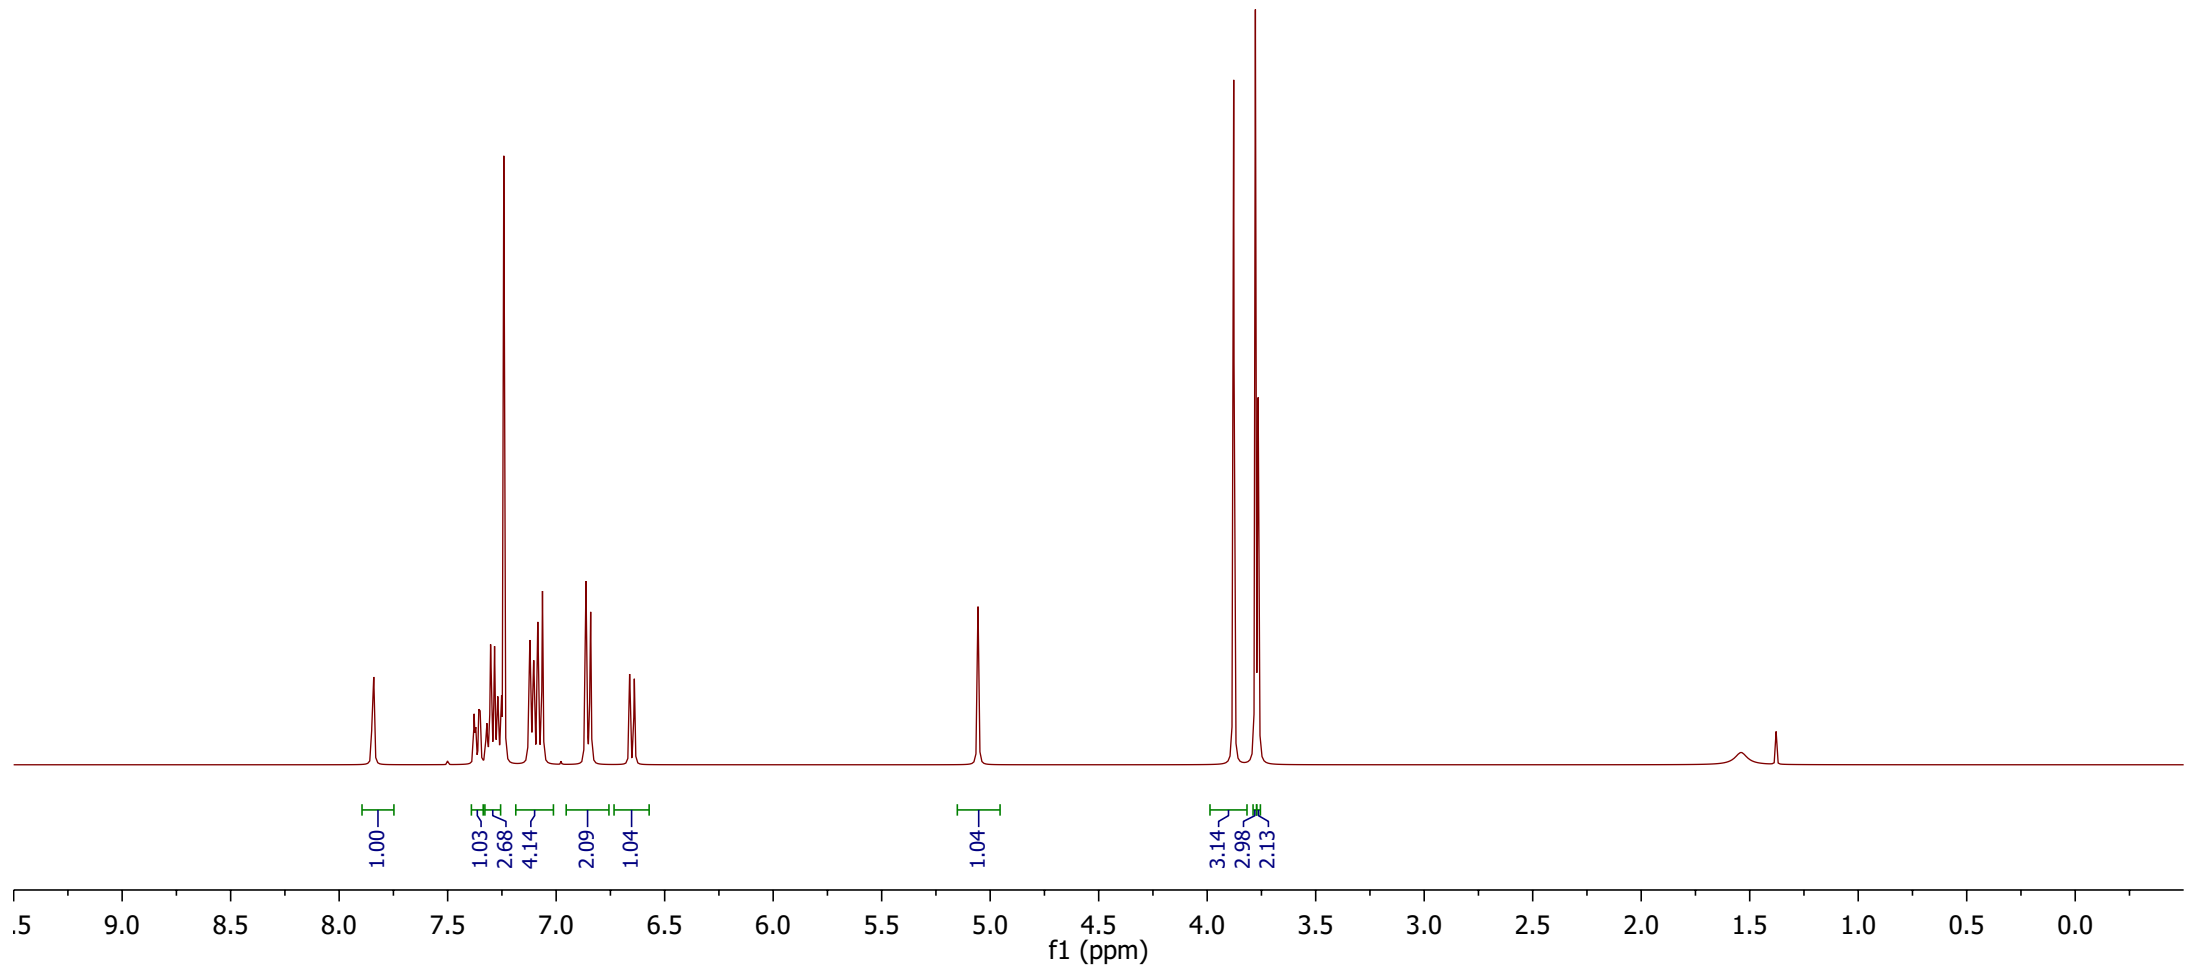

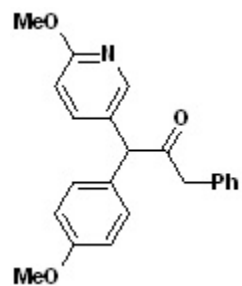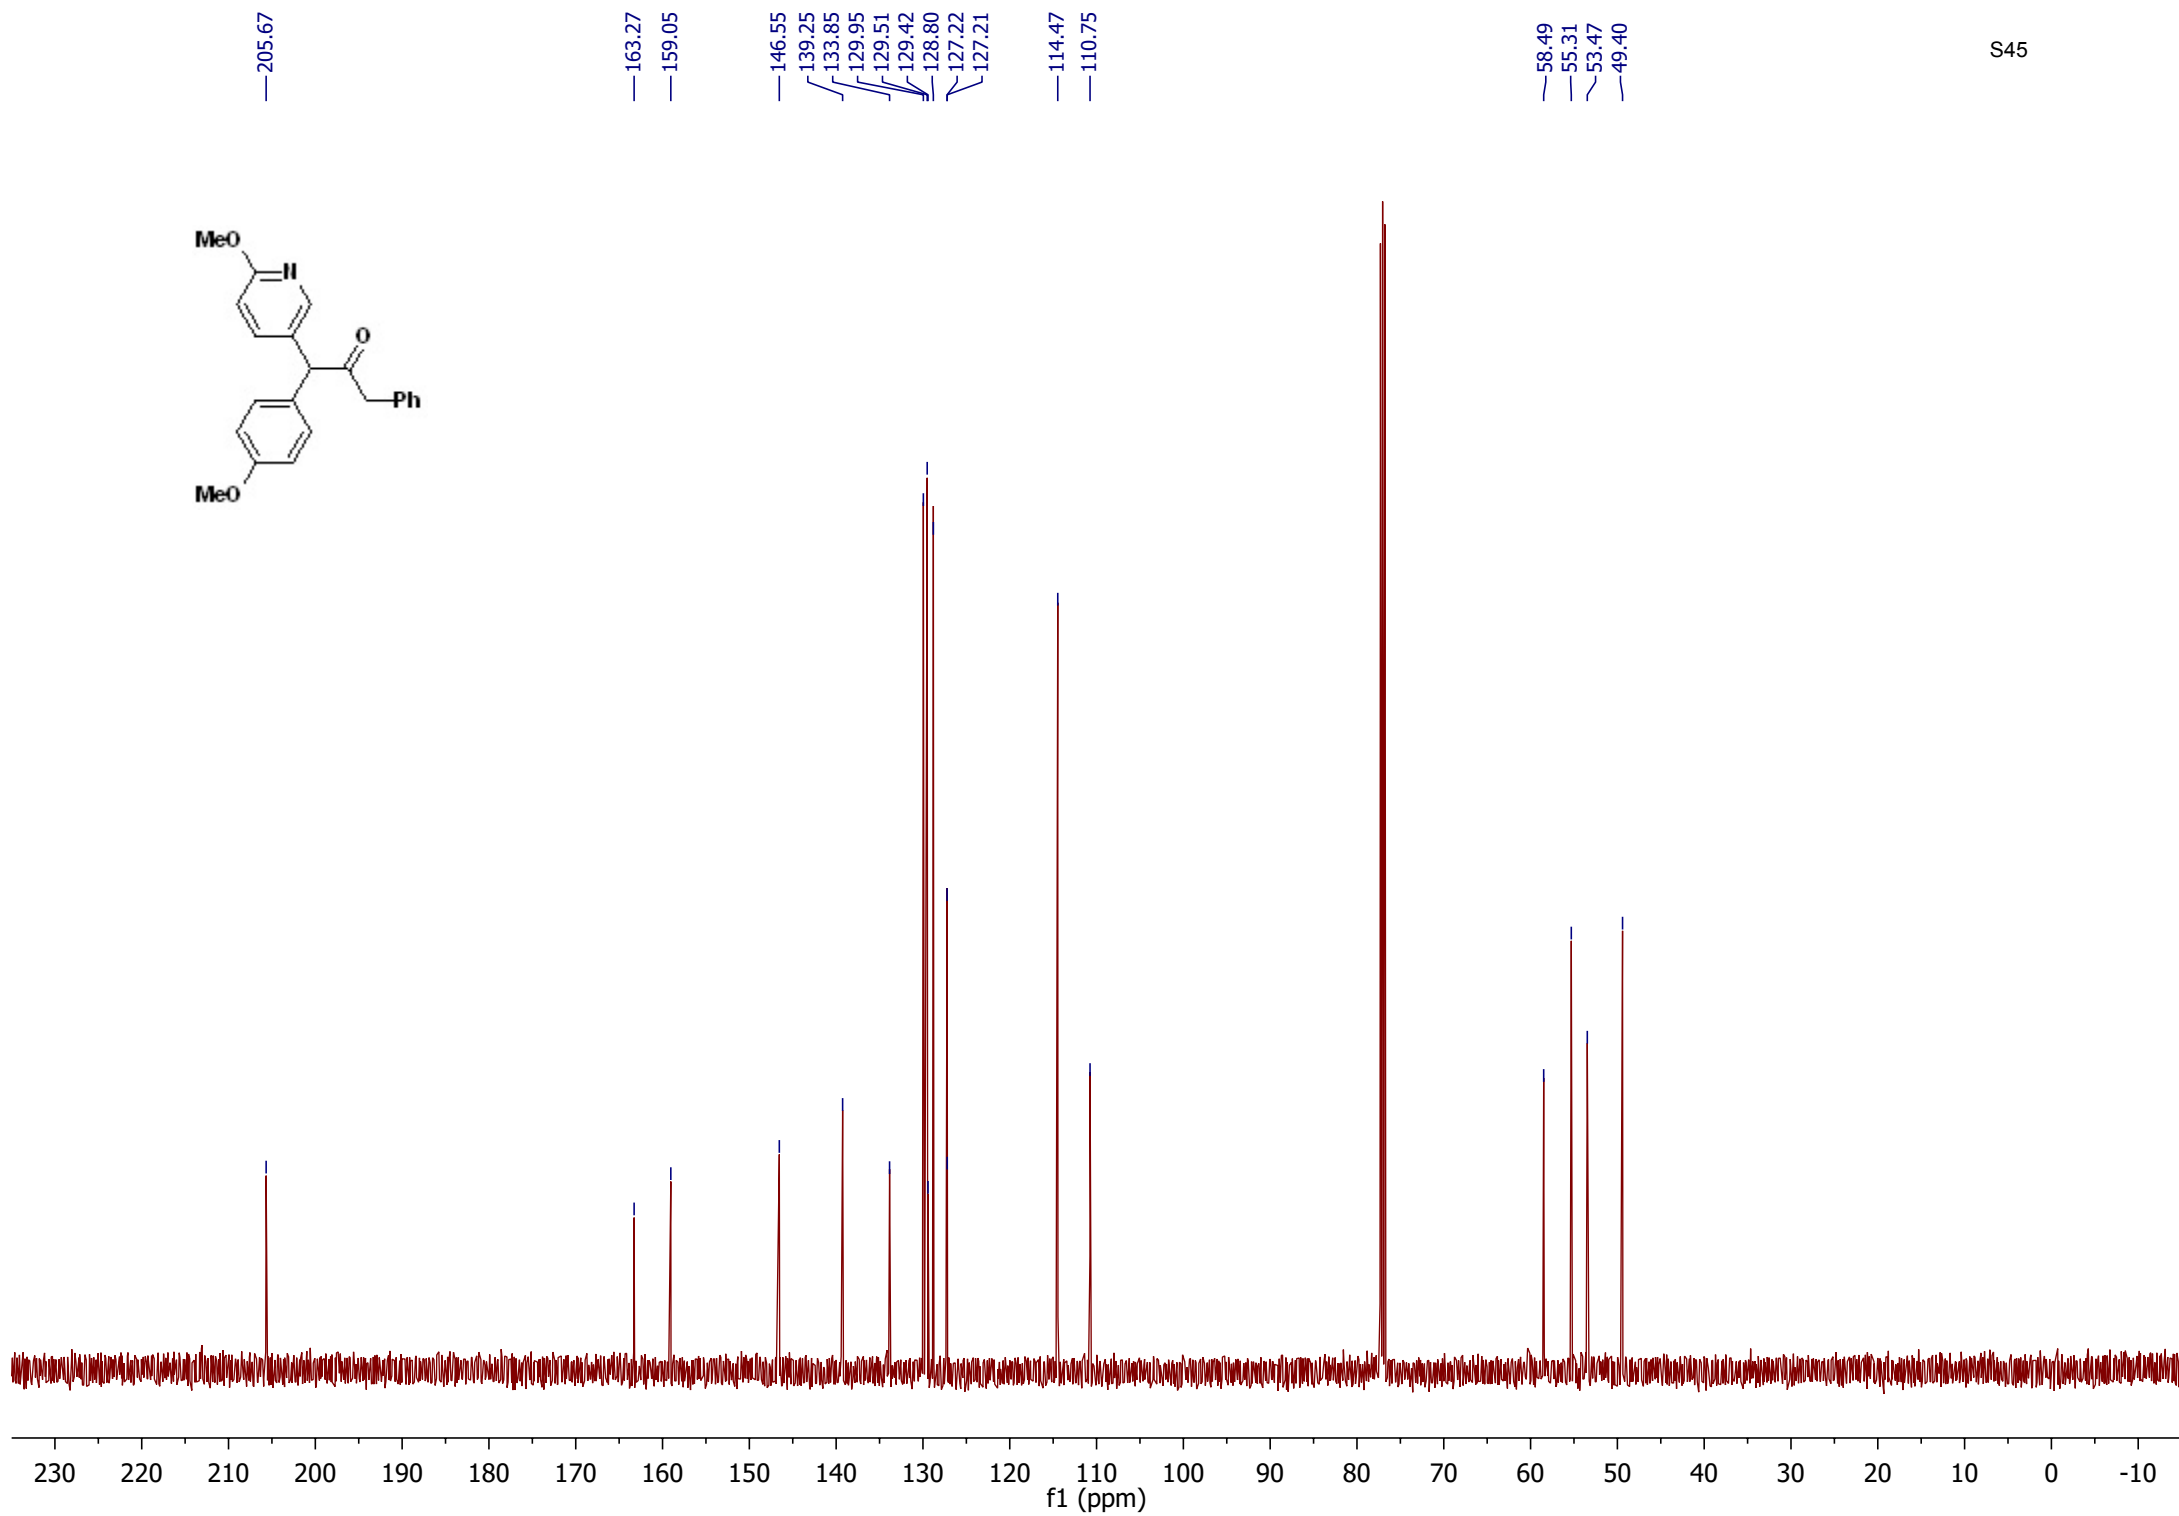

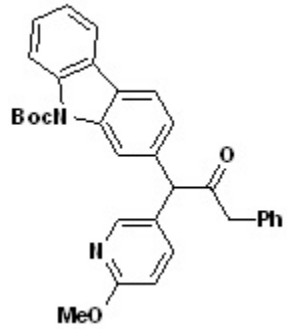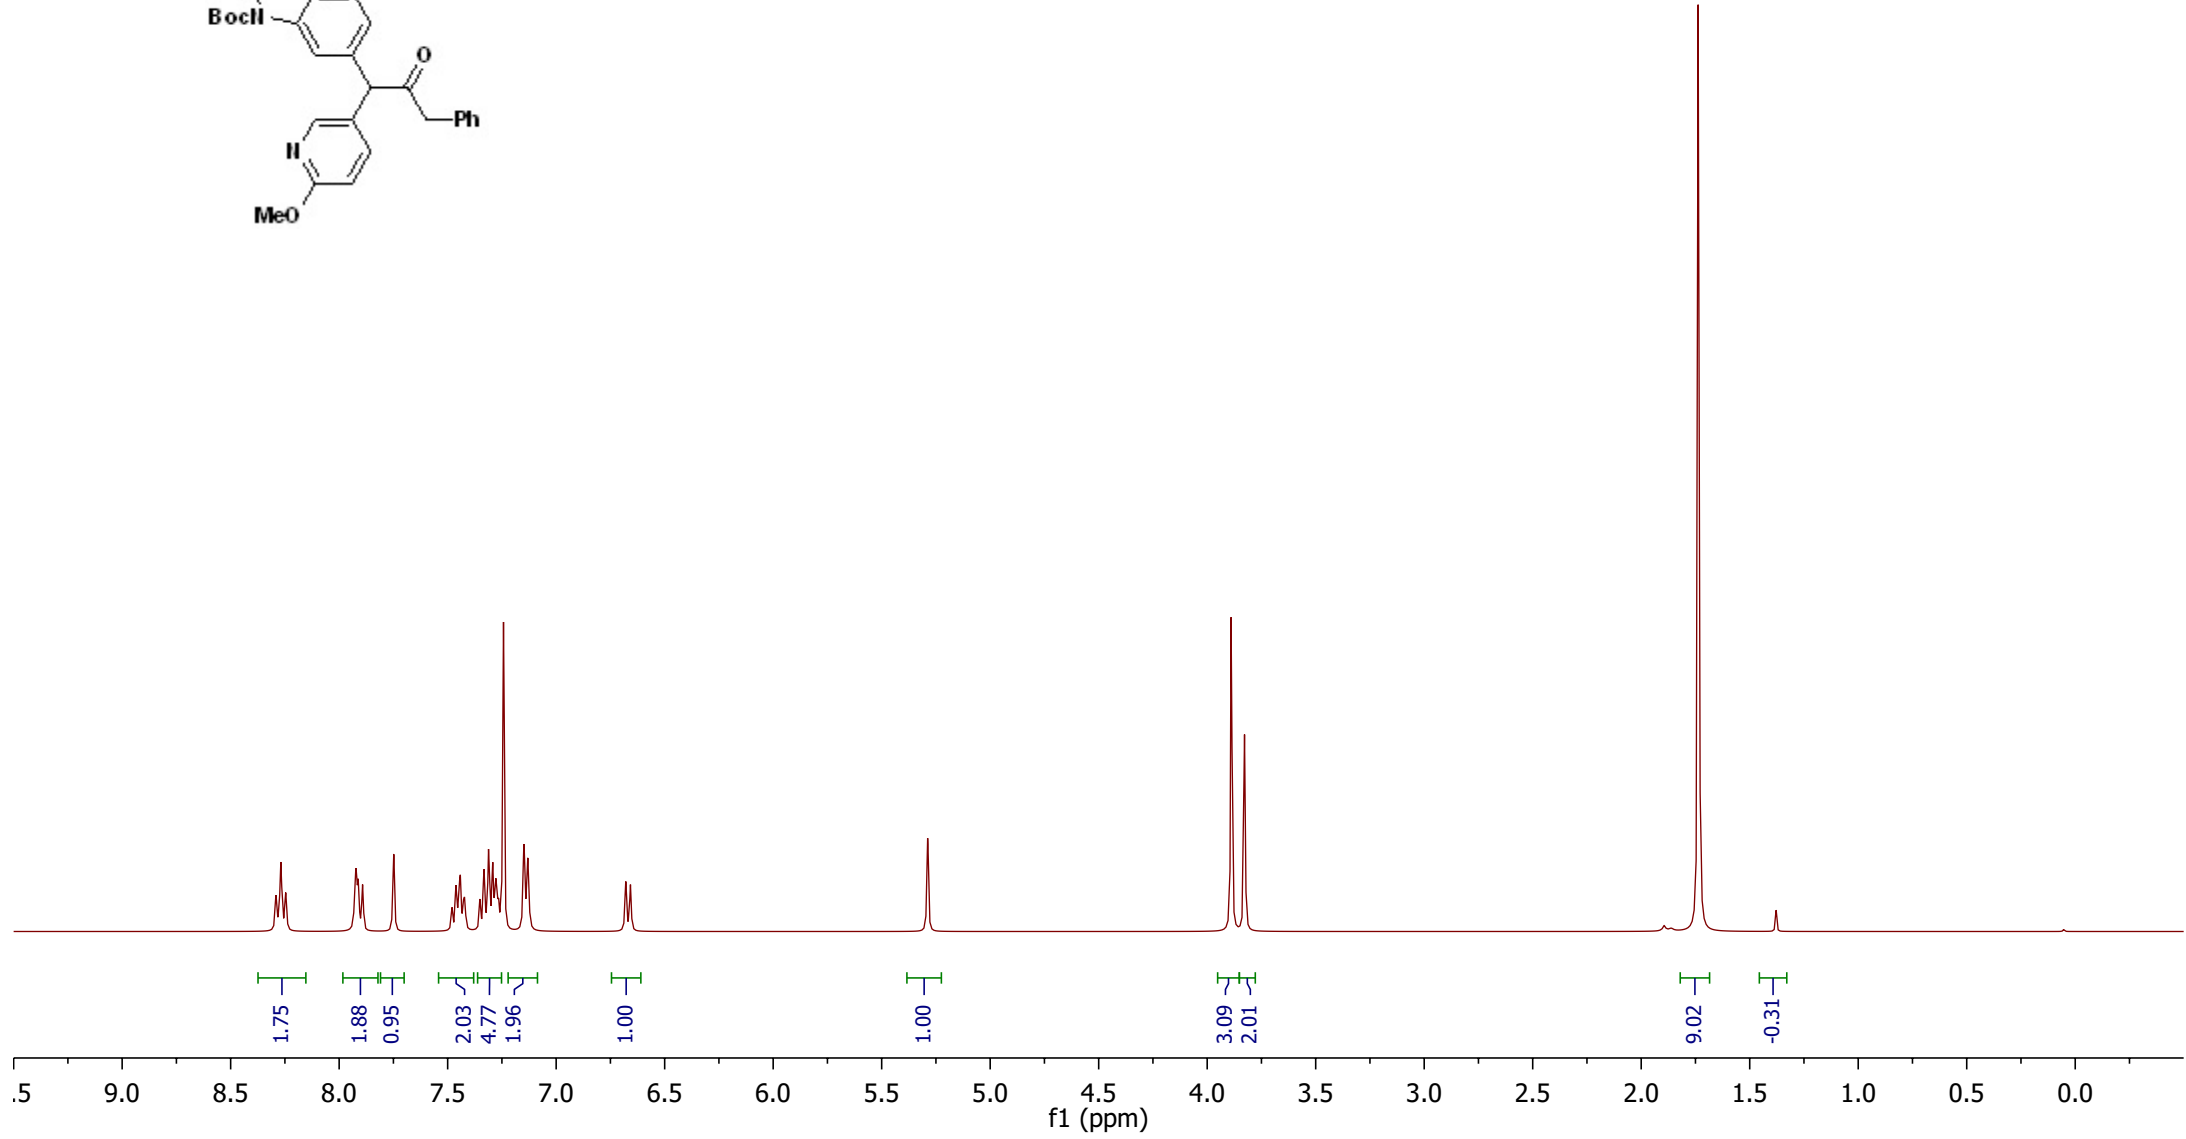

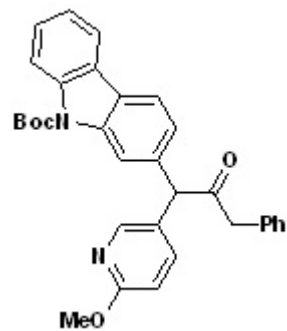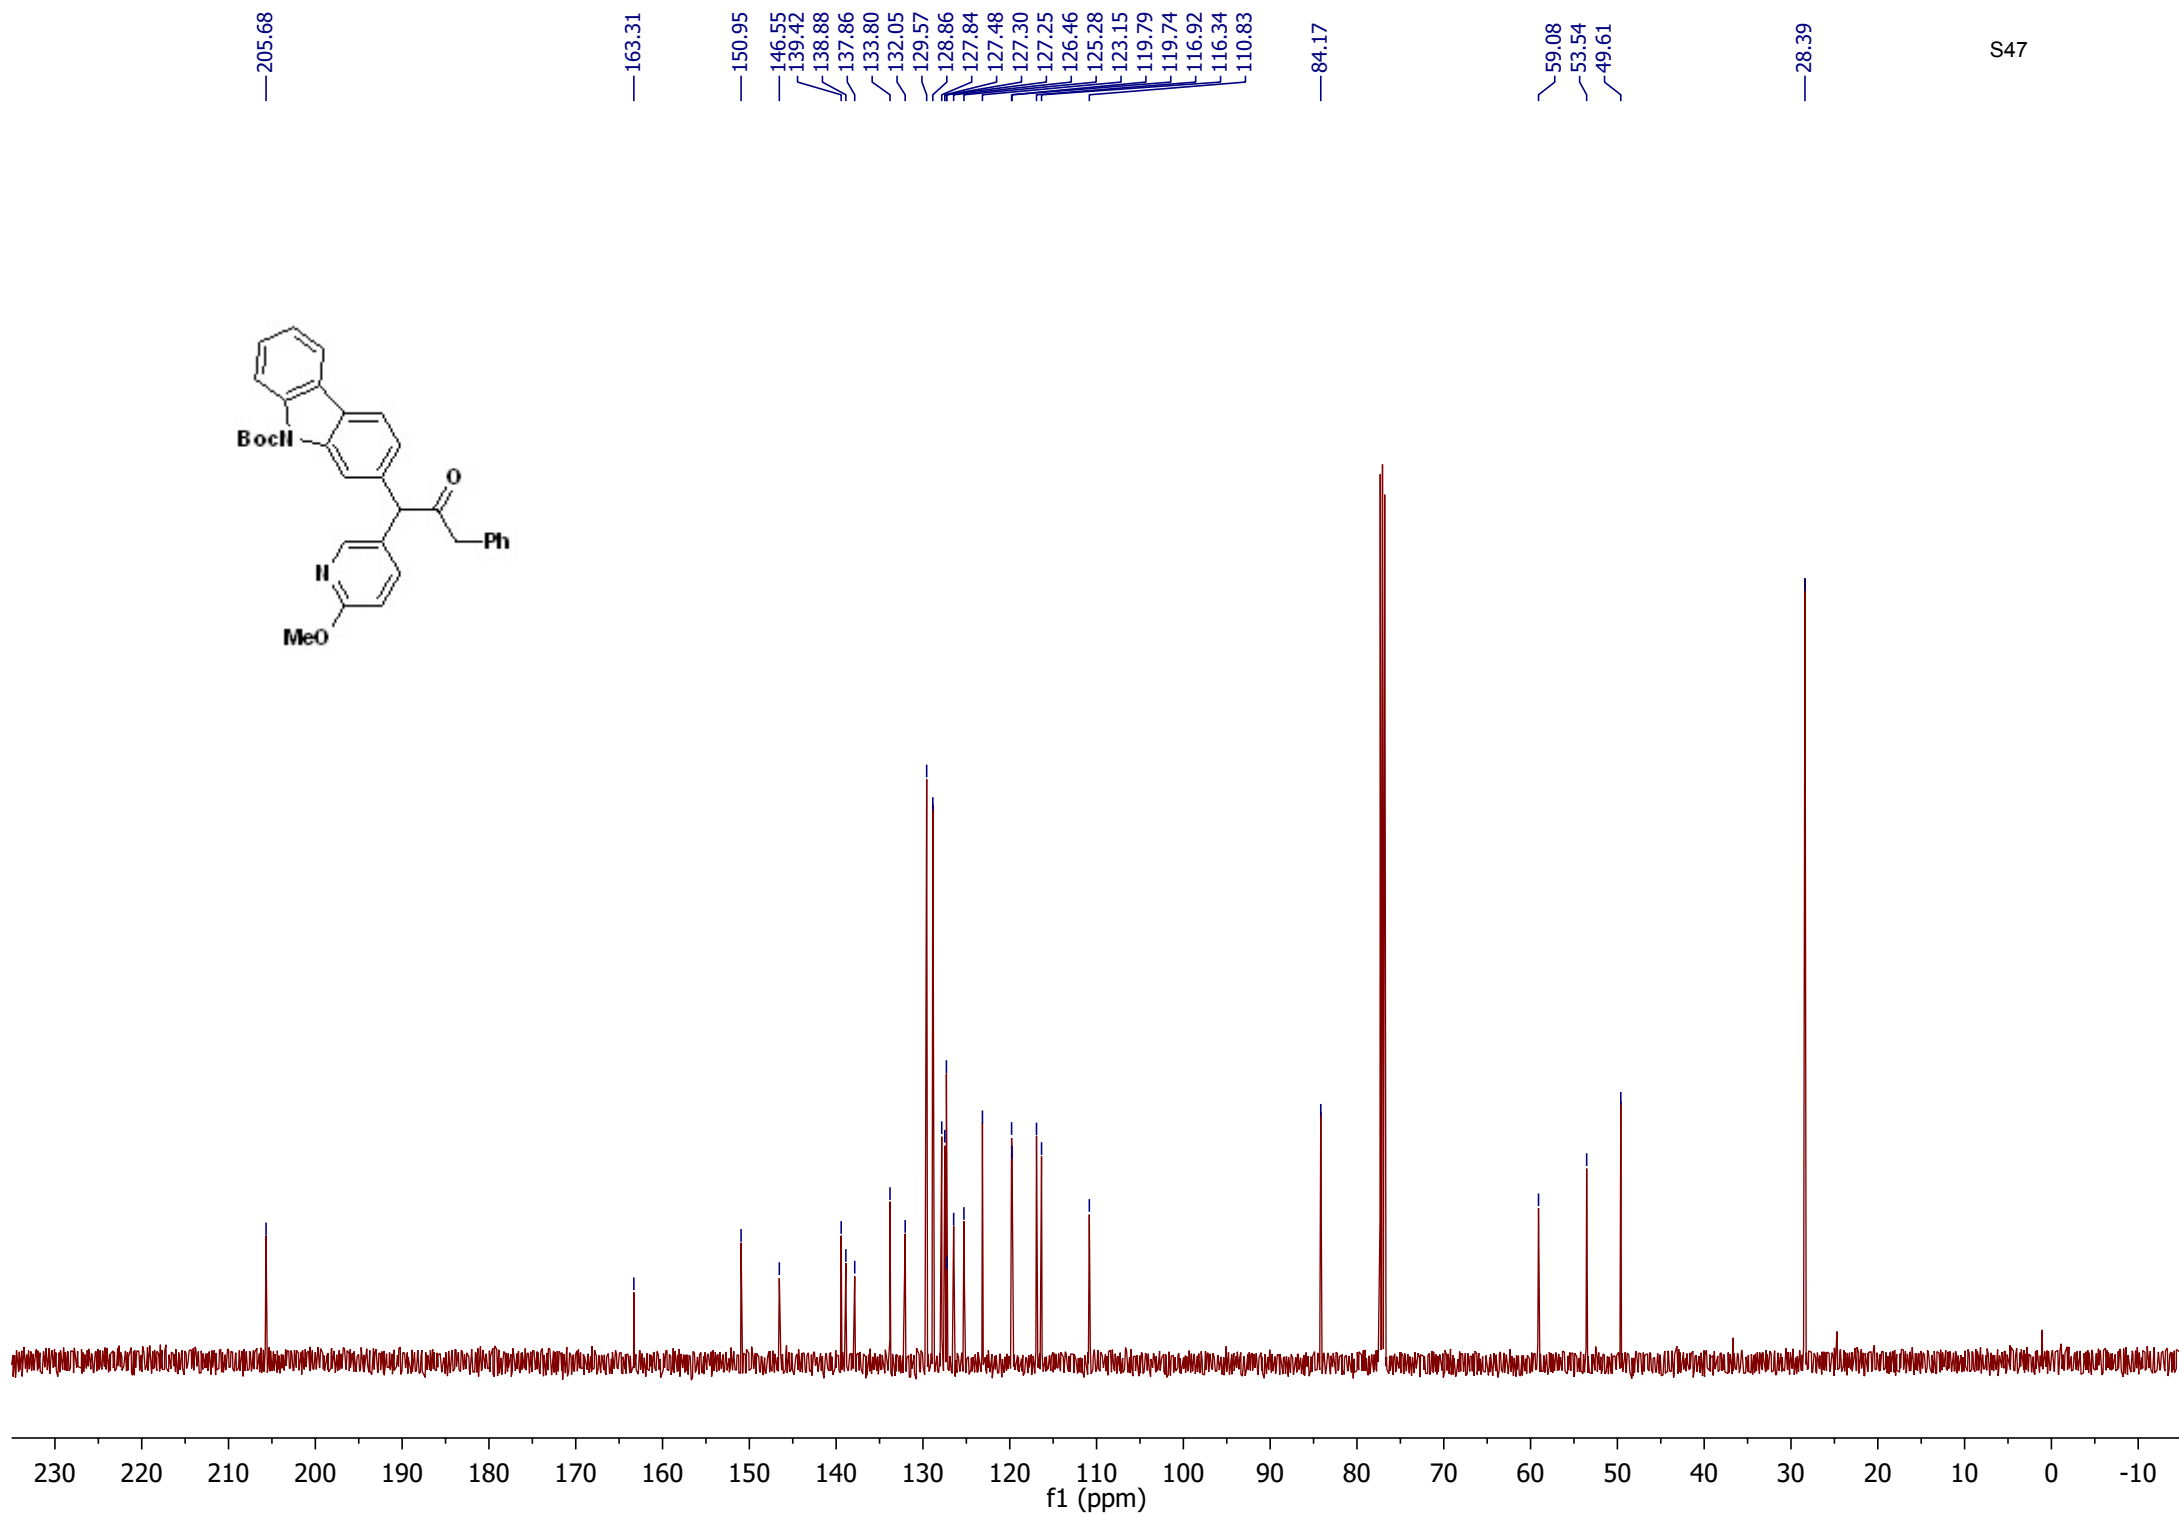

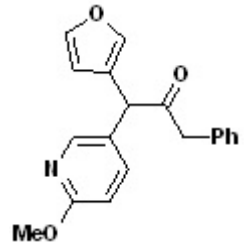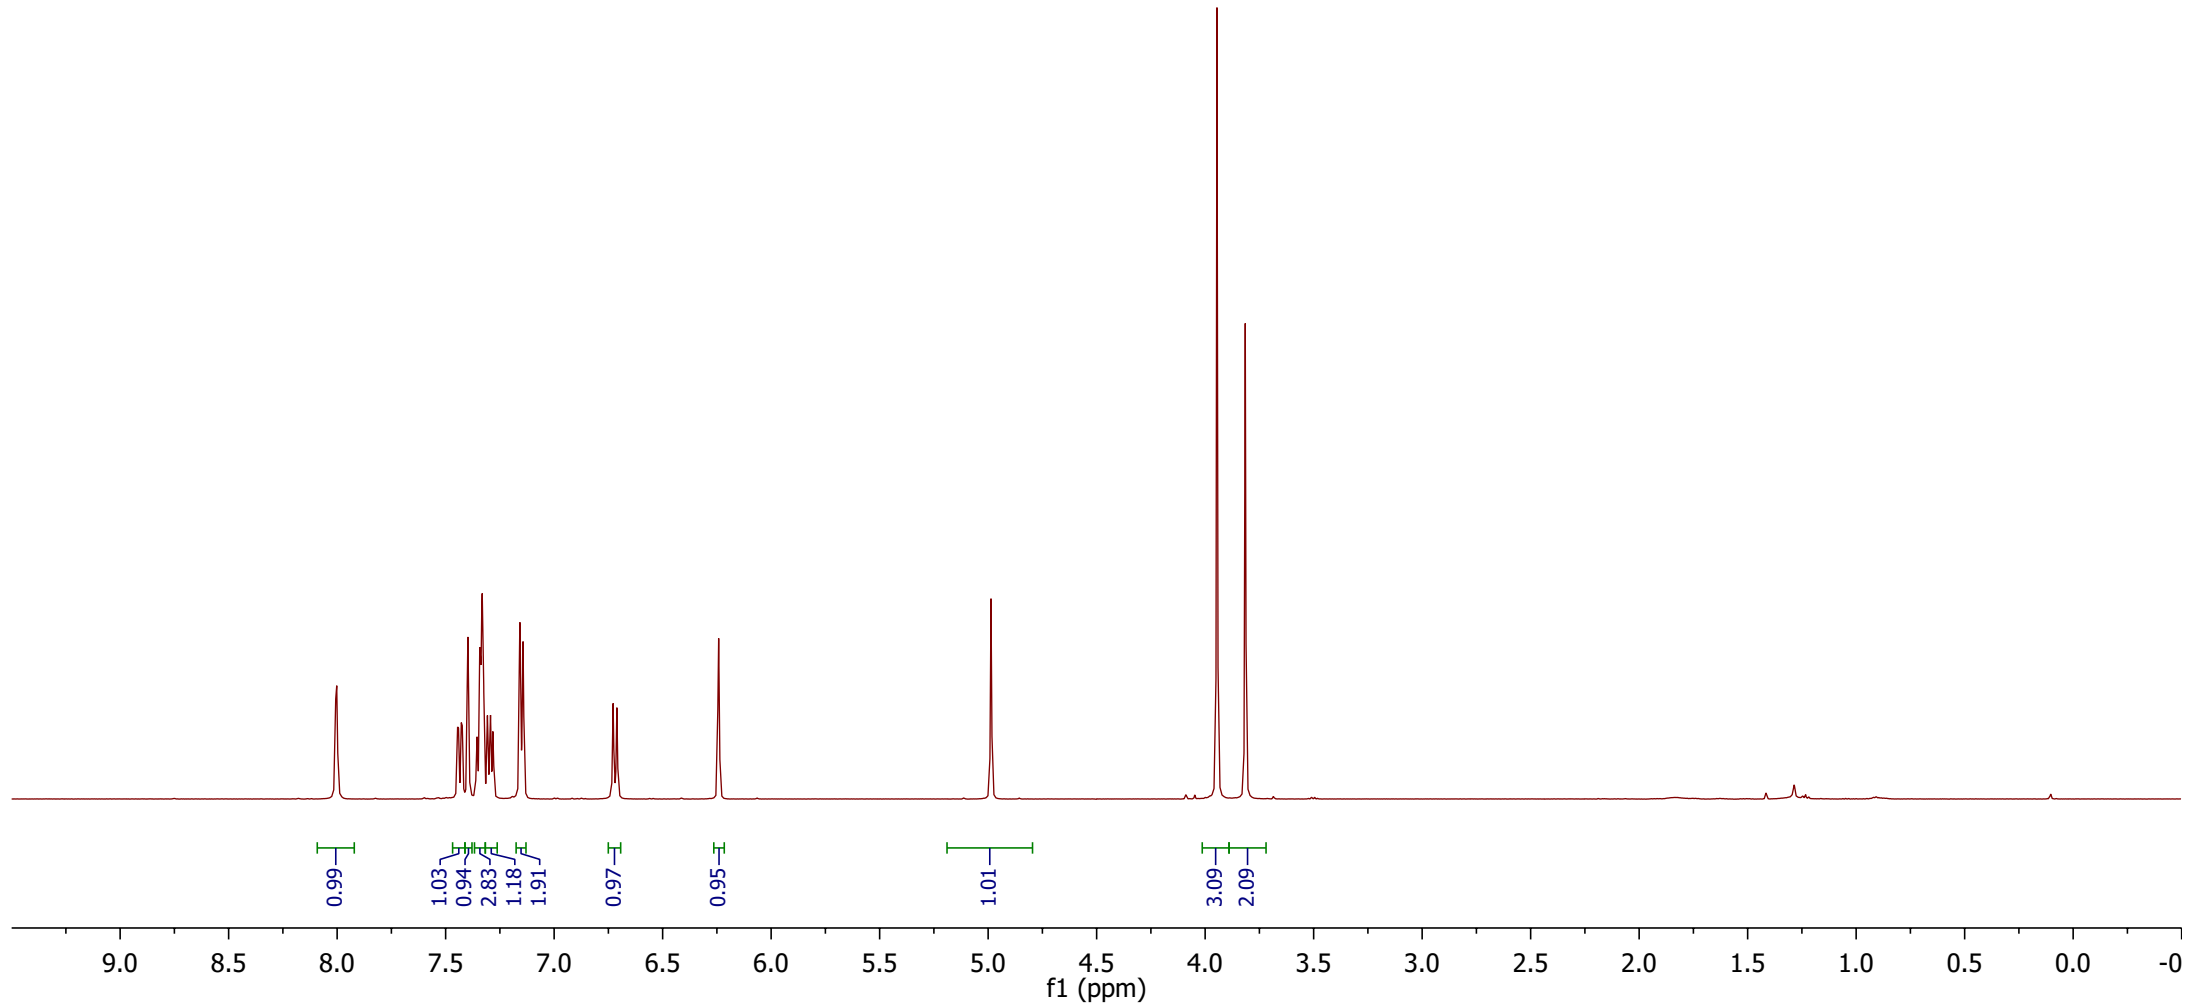



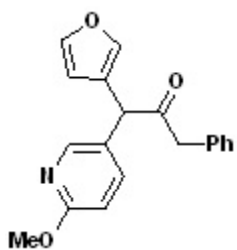

— 204.82

— 163.63

— 146.59

— 143.37

— 140.60

— 138.84

— 133.57

— 129.48

— 128.83

— 127.29

— 126.27

— 122.30

— 111.16

— 110.63

— 53.51

— 50.51

— 48.87

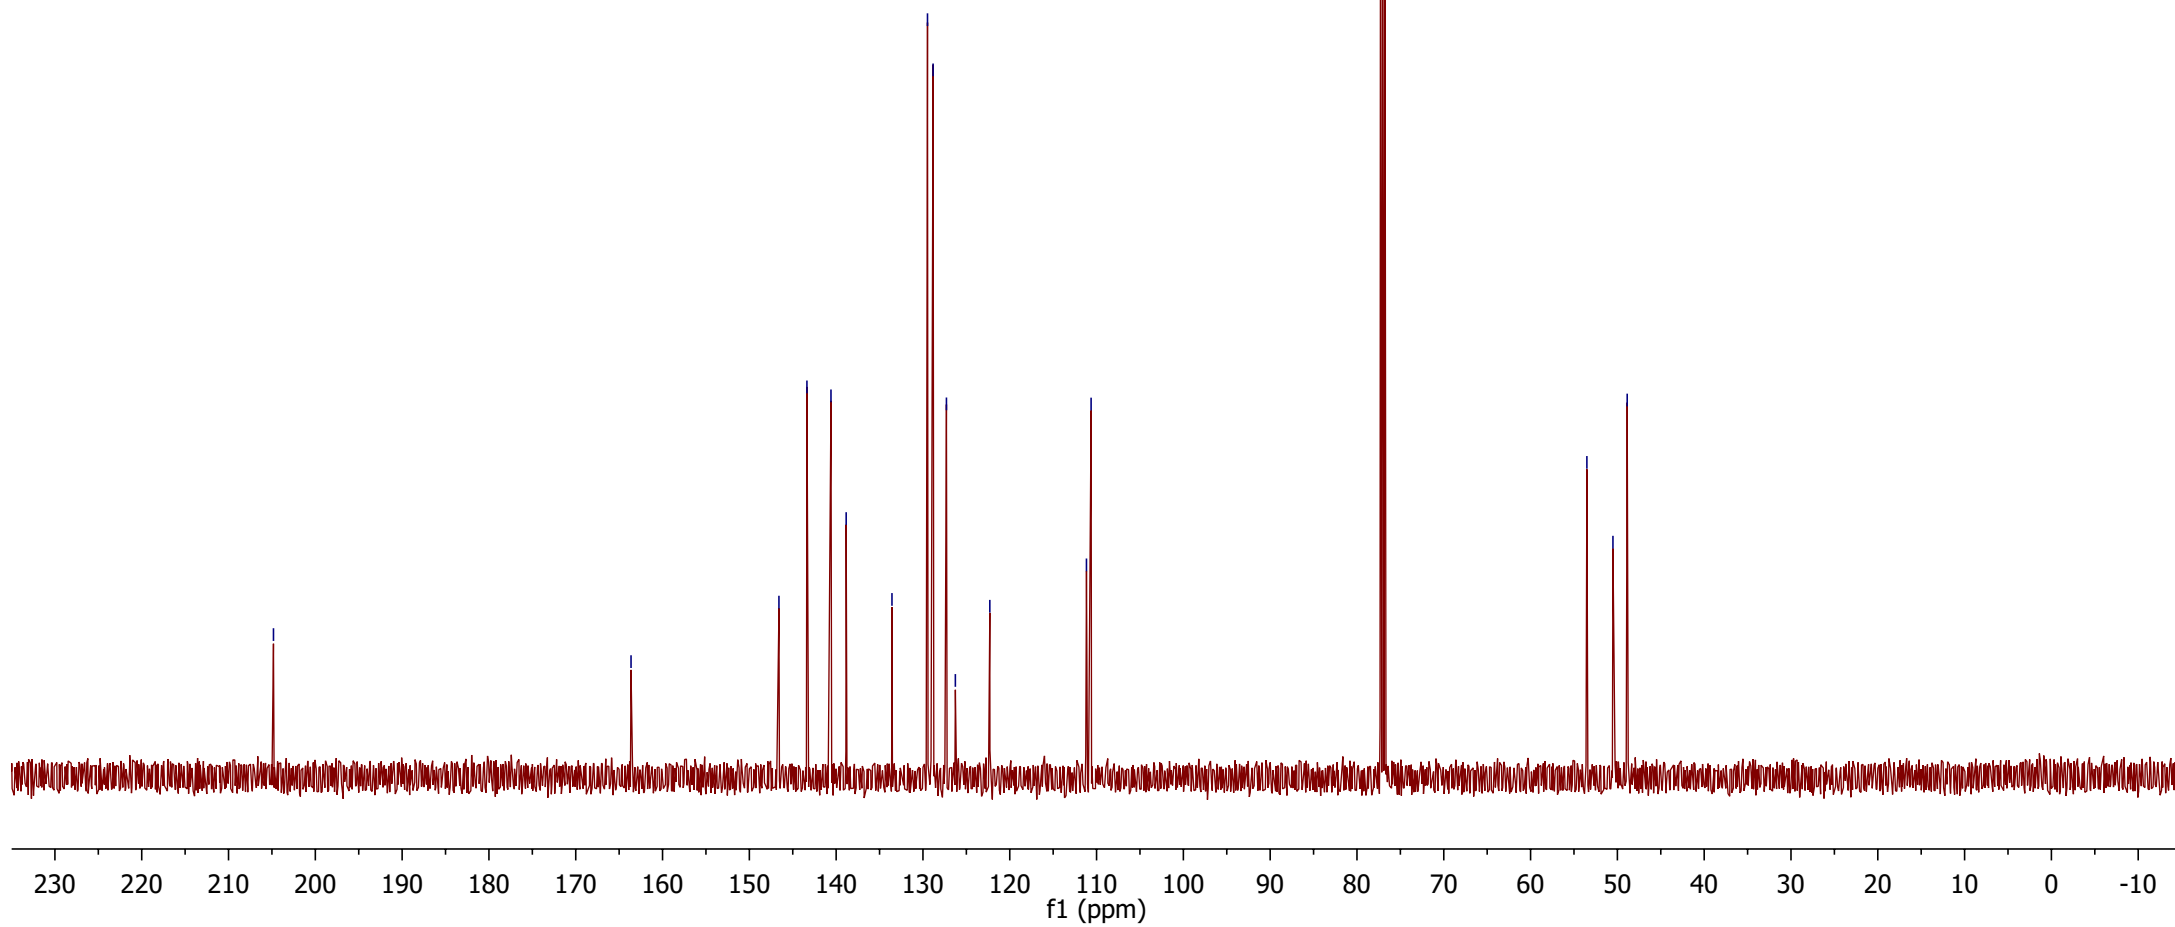

Supplement: c9ob00961b1.pdf [file c9ob00961b1.pdf]
